# Supplementary material for: Model Optimization and In Silico Analysis of Potential Dipeptidyl Peptidase IV Antagonists from GC-MS Identified Compounds in Nauclea latifolia Leaf Extracts
Source: MDPI journal article supplement (doi:10.3390/ijms20235913), 2019-11-25

## Library

&lt;&lt; Target &gt;&gt;

Line#:1 R.Time:5.808(Scan#:38) MassPeaks:37

RawMode:Single 5.808(38) BasePeak:45.05(8413861)

BG Mode:None Group 1 - Event 1

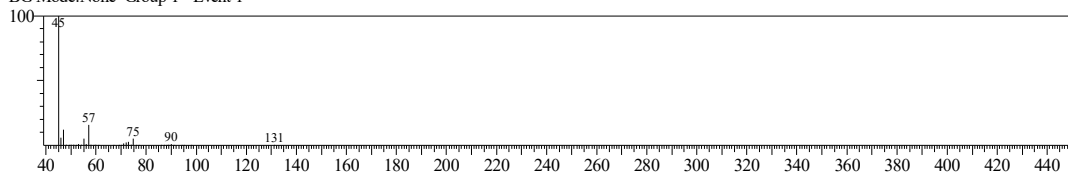

Hit#:1 Entry:1186 Library:NIST11s.lib

SI:94 Formula:C4H10O2 CAS:513-85-9 MolWeight:90 RetIndex:743

CompName:2,3-Butanediol \$\$ Butane-2,3-diol \$\$ Dimethylethylene glycol \$\$ 2,3-Butylene glycol \$\$ 2,3-Dihydroxybutane \$\$ D-2,3-Butane diol \$\$ 2,3-Butane

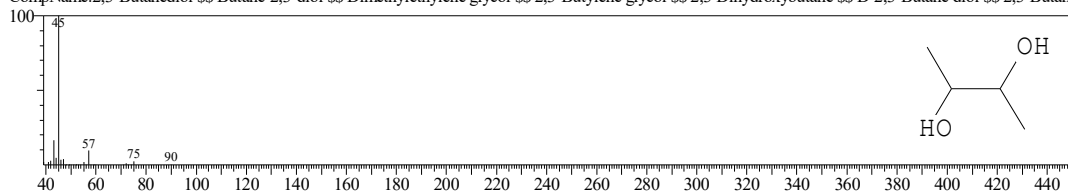

Hit#:2 Entry:1142 Library:NIST11s.lib

SI:94 Formula:C4H10O2 CAS:24347-58-8 MolWeight:90 RetIndex:743

CompName:2,3-Butanediol, [R-(R\*,R\*)]- \$\$ 2,3-Butanediol # \$\$

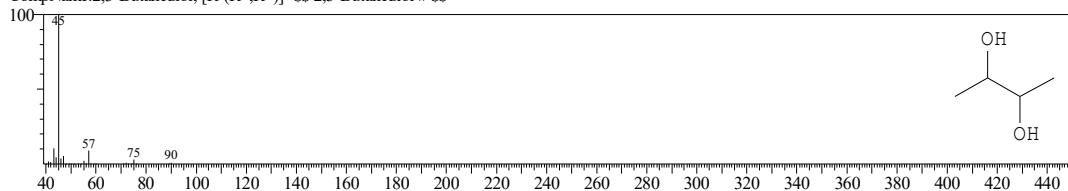

Hit#:3 Entry:1141 Library:NIST11s.lib

SI:94 Formula:C4H10O2 CAS:513-85-9 MolWeight:90 RetIndex:743

CompName:2,3-Butanediol \$\$ Butane-2,3-diol \$\$ Dimethylethylene glycol \$\$ 2,3-Butylene glycol \$\$ 2,3-Dihydroxybutane \$\$ D-2,3-Butane diol \$\$ 2,3-Butane

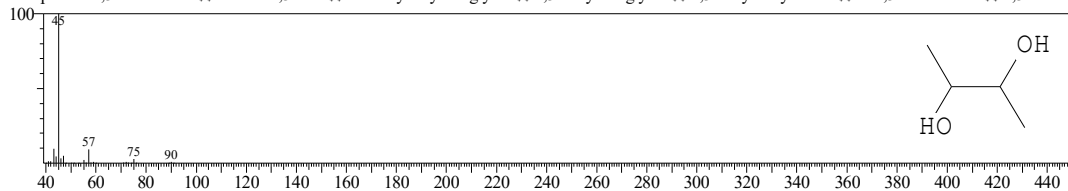

Hit#:4 Entry:1184 Library:NIST11s.lib

SI:94 Formula:C4H10O2 CAS:513-85-9 MolWeight:90 RetIndex:743

CompName:2,3-Butanediol \$\$ Butane-2,3-diol \$\$ Dimethylethylene glycol \$\$ 2,3-Butylene glycol \$\$ 2,3-Dihydroxybutane \$\$ D-2,3-Butane diol \$\$ 2,3-Butane

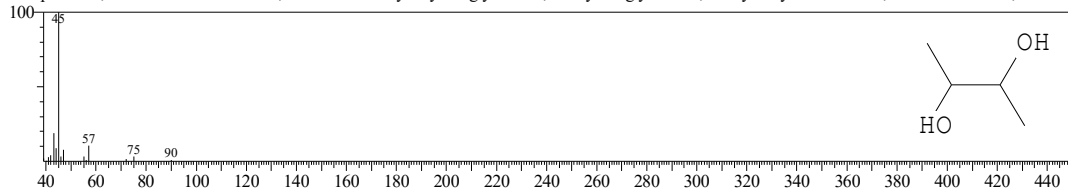

Hit#:5 Entry:1139 Library:NIST11s.lib

SI:93 Formula:C4H10O2 CAS:19132-06-0 MolWeight:90 RetIndex:743

CompName:2,3-Butanediol, [S-(R\*,R\*)]- \$\$ (2S,3S)-(+)-2,3-Butanediol \$\$ 2,3-Butanediol # \$\$

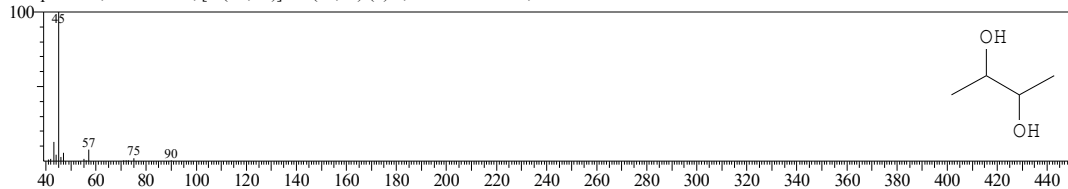

&lt;&lt; Target &gt;&gt;

Line#:2 R.Time:8.867(Scan#:405) MassPeaks:53  
RawMode:Single 8.867(405) BasePeak:57.00(245537)  
BG Mode:None Group 1 - Event 1

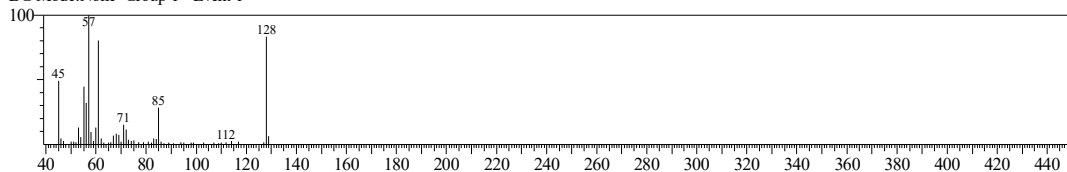

Hit#1 Entry:7041 Library:NIST11.lib

SE:77 Formula:C6H8O3 CAS:3658-77-3 MolWeight:128 RetIndex:1022

CompName:2,5-Dimethyl-4-hydroxy-3(2H)-furanone \$\$ 3(2H)-Furanone, 4-hydroxy-2,5-dimethyl- \$ 3(2H)-Furanone, 2,5-dimethyl-4-hydroxy- \$ Allotone \$

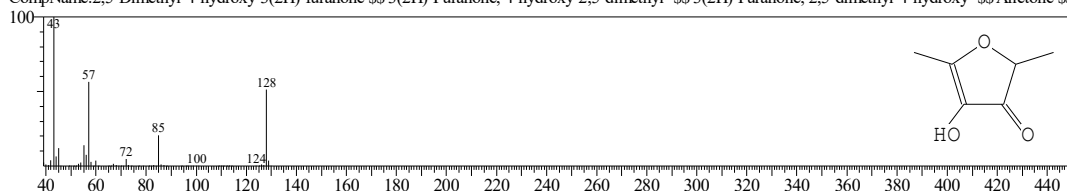

Hit#2 Entry:7057 Library:NIST11.lib

SE:73 Formula:C6H8O3 CAS:28664-35-9 MolWeight:128 RetIndex:1088

CompName:2(5H)-Furanone, 3-hydroxy-4,5-dimethyl- \$ Sotolone \$ 4,5-Dimethyl-3-hydroxy-2(5H)-furanone \$ Furan-2(5H)-one, 3-hydroxy-4,5-dimethyl- \$

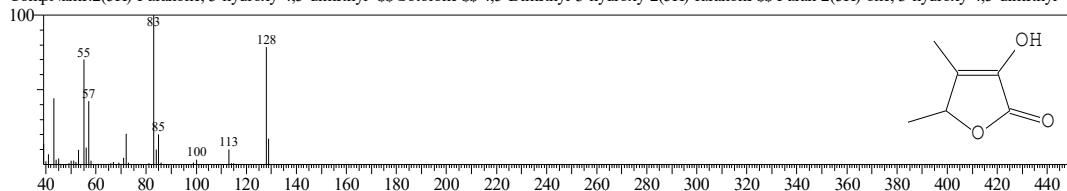

Hit#3 Entry:17824 Library:NIST11.lib

SE:72 Formula:C10H21NOS CAS:1114-71-2 MolWeight:203 RetIndex:1467

CompName:Pebulate \$ Carbamthioic acid, butylethyl-, S-propyl ester \$ Carbamic acid, butylethylthio-, S-propyl ester \$ Butylethylthiocarbamic acid S-propyl ester

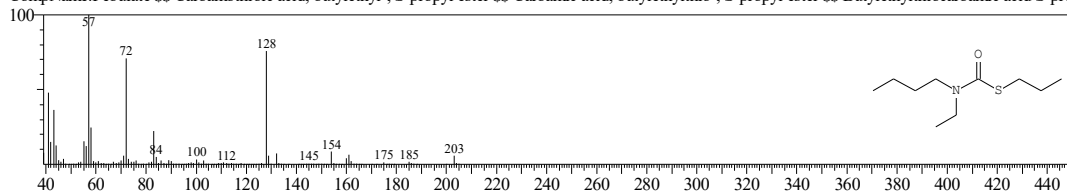

Hit#4 Entry:86713 Library:NIST11.lib

SE:72 Formula:C9H12N2O7 CAS:957-77-7 MolWeight:260 RetIndex:2389

CompName:5-Hydroxyuridine \$ Uridine, 5-hydroxy- \$

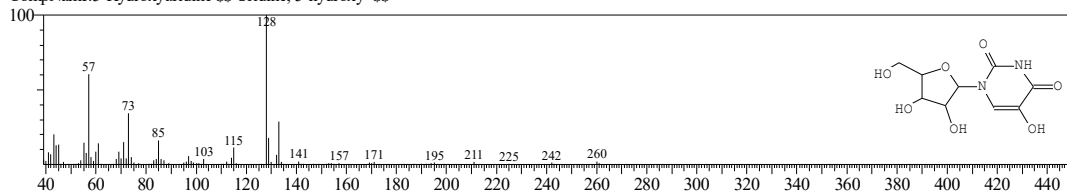

Hit#5 Entry:74152 Library:NIST11.lib

SE:71 Formula:C11H17NOS2 CAS:147723-52-2 MolWeight:243 RetIndex:2181

CompName:Piperidine-1-dithiocarboxylic acid, 2-oxocyclopentyl ester \$ 2-Oxocyclopentyl 1-piperidinecarbodithioate # \$

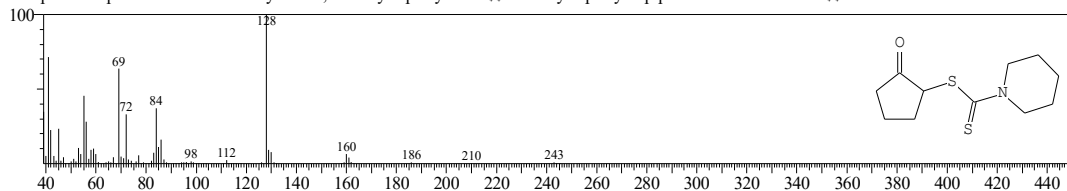

&lt;&lt; Target &gt;&gt;

Line#:3 R.Time:10.883(Scan#:647) MassPeaks:72  
RawMode:Single 10.883(647) BasePeak:109.95(8362006)  
BG Mode:None Group 1 - Event 1

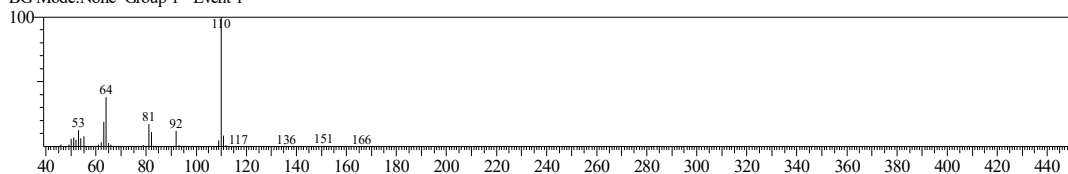

Hit#1 Entry:2673 Library:NIST11s.lib

SE:98 Formula:C<sub>6</sub>H<sub>6</sub>O<sub>2</sub> CAS:120-80-9 MolWeight:110 RetIndex:1122

CompName:Catechol \$\$ 1,2-Benzenediol \$\$ Pyrocatechol \$\$ o-Benzenediol \$\$ o-Dihydroxybenzene \$\$ o-Dioxybenzene \$\$ o-Hydroxyphenol \$\$ o-Phenylenedi

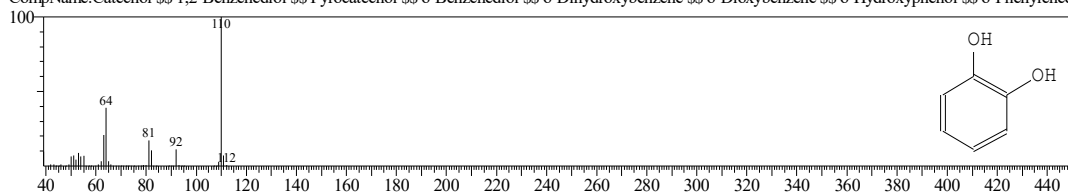

Hit#2 Entry:2674 Library:NIST11s.lib

SE:98 Formula:C<sub>6</sub>H<sub>6</sub>O<sub>2</sub> CAS:120-80-9 MolWeight:110 RetIndex:1122

CompName:Catechol \$\$ 1,2-Benzenediol \$\$ Pyrocatechol \$\$ o-Benzenediol \$\$ o-Dihydroxybenzene \$\$ o-Dioxybenzene \$\$ o-Hydroxyphenol \$\$ o-Phenylenedi

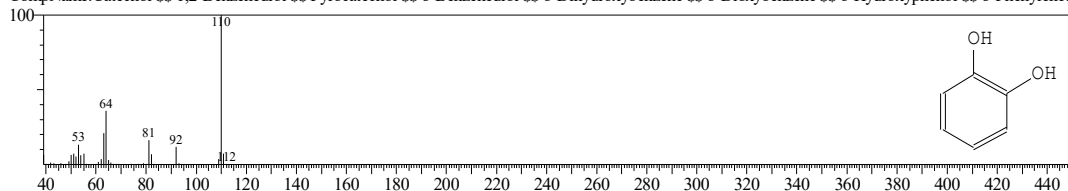

Hit#3 Entry:3063 Library:NIST11s.lib

SE:94 Formula:C<sub>6</sub>H<sub>6</sub>O<sub>2</sub> CAS:120-80-9 MolWeight:110 RetIndex:1122

CompName:Catechol \$\$ 1,2-Benzenediol \$\$ Pyrocatechol \$\$ o-Benzenediol \$\$ o-Dihydroxybenzene \$\$ o-Dioxybenzene \$\$ o-Hydroxyphenol \$\$ o-Phenylenedi

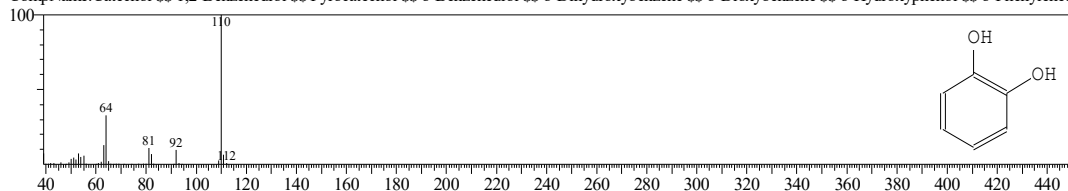

Hit#4 Entry:2678 Library:NIST11s.lib

SE:89 Formula:C<sub>6</sub>H<sub>6</sub>O<sub>2</sub> CAS:108-46-3 MolWeight:110 RetIndex:1122

CompName:Resorcinol \$\$ 1,3-Benzenediol \$\$ .alpha.-Resorcinol \$\$ m-Benzenediol \$\$ m-Dihydroxybenzene \$\$ m-Dioxybenzene \$\$ m-Hydroquinone \$\$ m-Hy

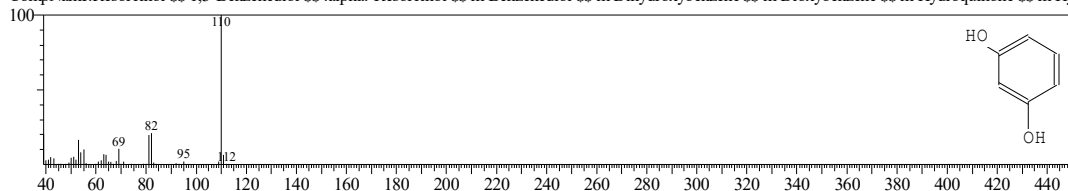

Hit#5 Entry:2679 Library:NIST11s.lib

SE:89 Formula:C<sub>6</sub>H<sub>6</sub>O<sub>2</sub> CAS:108-46-3 MolWeight:110 RetIndex:1122

CompName:Resorcinol \$\$ 1,3-Benzenediol \$\$ .alpha.-Resorcinol \$\$ m-Benzenediol \$\$ m-Dihydroxybenzene \$\$ m-Dioxybenzene \$\$ m-Hydroquinone \$\$ m-Hy

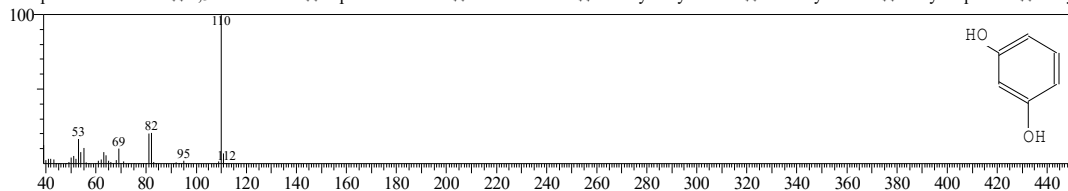

&lt;&lt; Target &gt;&gt;

Line#:4 R.Time:11.108(Scan#:674) MassPeaks:71

RawMode:Single 11.108(674) BasePeak:120.00(531607)

BG Mode:None Group 1 - Event 1

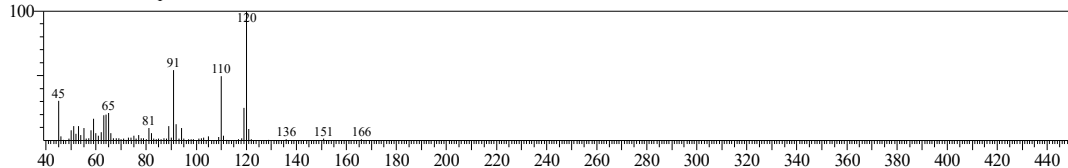

Hit#1 Entry:4095 Library:NIST11s.lib

SE:78 Formula:C<sub>8</sub>H<sub>8</sub>O CAS:496-16-2 MolWeight:120 RetIndex:1036

CompName:Benzo[1,2-b:4,5-b']difuran, 2,3-dihydro- \$\$ Coumaran \$\$ Dihydrobenzofuran \$\$ Dihydrocoumarone \$\$ Kumaran \$\$ 2,3-Dihydrobenzofuran \$\$ 2,3-Dihydro-1-ben

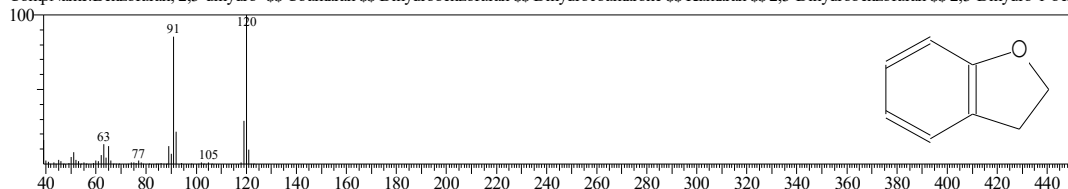

Hit#2 Entry:5306 Library:NIST11s.lib

SE:77 Formula:C<sub>8</sub>H<sub>8</sub>O CAS:496-16-2 MolWeight:120 RetIndex:1036

CompName:Benzo[1,2-b:4,5-b']difuran, 2,3-dihydro- \$\$ Coumaran \$\$ Dihydrobenzofuran \$\$ Dihydrocoumarone \$\$ Kumaran \$\$ 2,3-Dihydrobenzofuran \$\$ 2,3-Dihydro-1-ben

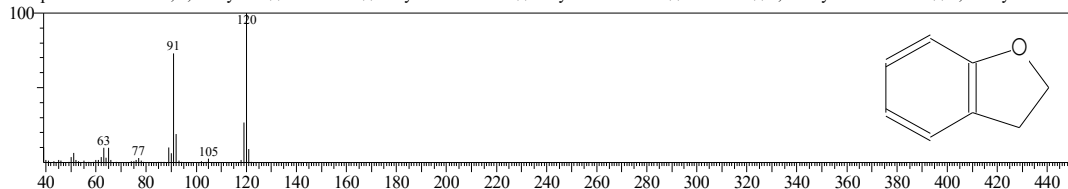

Hit#3 Entry:5304 Library:NIST11s.lib

SE:73 Formula:C<sub>8</sub>H<sub>8</sub>O CAS:766-94-9 MolWeight:120 RetIndex:959

CompName:Benzene, (ethenyloxy)- \$\$ Ether, phenyl vinyl \$\$ (Vinyloxy)benzene \$\$ Phenoxyethene \$\$ Phenoxyethylene \$\$ Phenyl vinyl ether \$\$ Vinyl phenyl e

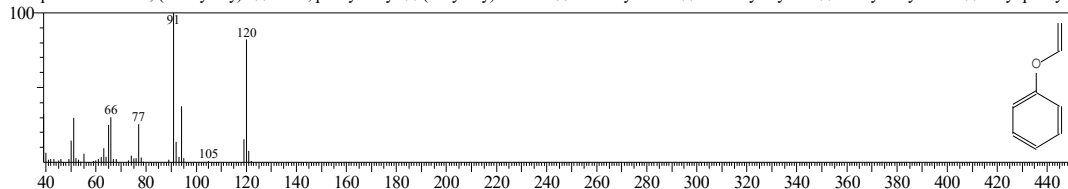

Hit#4 Entry:4094 Library:NIST11s.lib

SE:73 Formula:C<sub>8</sub>H<sub>8</sub>O CAS:766-94-9 MolWeight:120 RetIndex:959

CompName:Benzene, (ethenyloxy)- \$\$ Ether, phenyl vinyl \$\$ (Vinyloxy)benzene \$\$ Phenoxyethene \$\$ Phenoxyethylene \$\$ Phenyl vinyl ether \$\$ Vinyl phenyl e

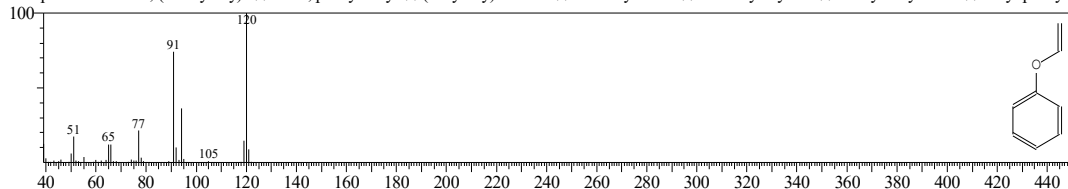

Hit#5 Entry:14596 Library:NIST11s.lib

SE:72 Formula:C<sub>10</sub>H<sub>12</sub>O CAS:5459-40-5 MolWeight:148 RetIndex:1172

CompName:4-Ethoxystyrene \$\$ p-Ethoxystyrene \$\$ Benzene, 1-ethenyl-4-ethoxy- \$\$ 1-Ethoxy-4-vinylbenzene # \$\$ p-Vinylphenetole \$\$

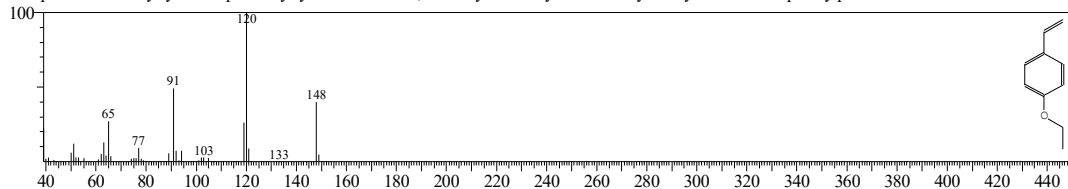

&lt;&lt; Target &gt;&gt;

Line#:5 R.Time:12.342(Scan#:822) MassPeaks:88  
RawMode:Single 12.342(822) BasePeak:150.05(795392)  
BG Mode:None Group 1 - Event 1

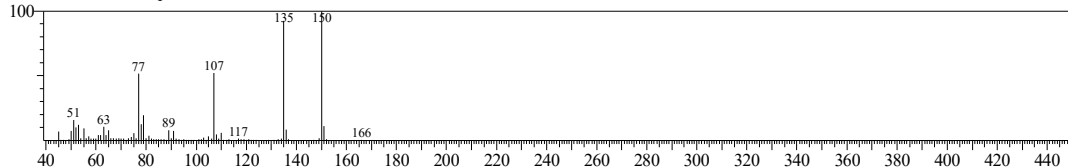

Hit#1 Entry:15257 Library:NIST11s.lib

SE:91 Formula:C9H10O2 CAS:7786-61-0 MolWeight:150 RetIndex:1293

CompName:2-Methoxy-4-vinylphenol \$\$ Phenol, 4-ethenyl-2-methoxy- \$\$ Phenol, 2-methoxy-4-vinyl- \$\$ 4-Hydroxy-3-methoxystyrene \$\$ p-Vinylguaiacol \$\$

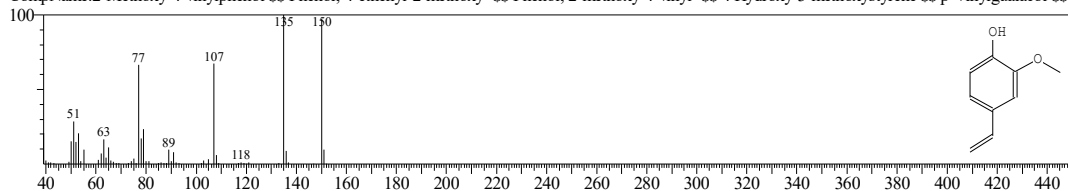

Hit#2 Entry:8939 Library:NIST11s.lib

SE:82 Formula:C9H10O2 CAS:586-37-8 MolWeight:150 RetIndex:1218

CompName:3-Methoxyacetophenone \$\$ Ethanone, 1-(3-methoxyphenyl)- \$\$ Acetophenone, 3'-methoxy- \$\$ 3-Acetylanisole \$\$ 1-Acetyl-3-methoxybenzene \$\$

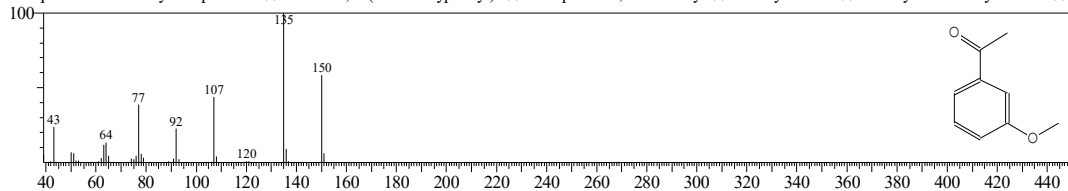

Hit#3 Entry:15258 Library:NIST11s.lib

SE:82 Formula:C9H10O2 CAS:586-37-8 MolWeight:150 RetIndex:1218

CompName:3-Methoxyacetophenone \$\$ Ethanone, 1-(3-methoxyphenyl)- \$\$ Acetophenone, 3'-methoxy- \$\$ 3-Acetylanisole \$\$ 1-Acetyl-3-methoxybenzene \$\$

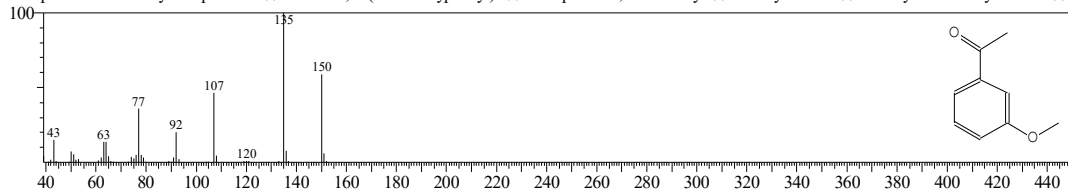

Hit#4 Entry:8932 Library:NIST11s.lib

SE:82 Formula:C9H10O2 CAS:875-59-2 MolWeight:150 RetIndex:1363

CompName:4-Hydroxy-2-methylacetophenone \$\$ 2-Methyl-4-hydroxyacetophenone \$\$ Ethanone, 1-(4-hydroxy-2-methylphenyl)- \$\$ 1-(4-Hydroxy-2-methylph

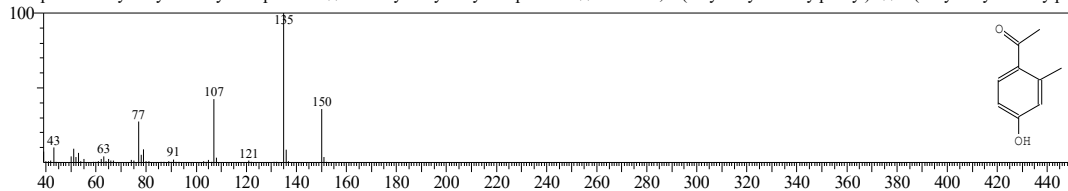

Hit#5 Entry:8936 Library:NIST11s.lib

SE:82 Formula:C9H10O2 CAS:876-02-8 MolWeight:150 RetIndex:1363

CompName:4-Hydroxy-3-methylacetophenone \$\$ 4-Hydroxy-3'-methylacetophenone \$\$ Ethanone, 1-(4-hydroxy-3-methylphenyl)- \$\$ 1-(4-Hydroxy-3-methylph

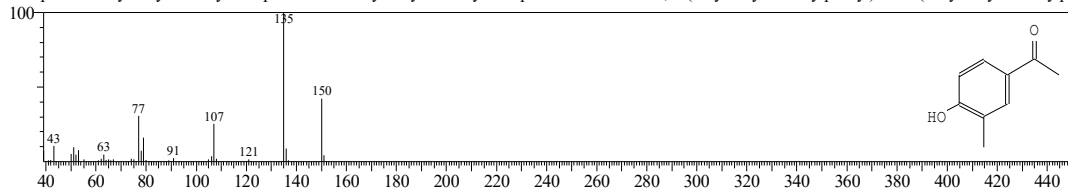

&lt;&lt; Target &gt;&gt;

Line#:6 R.Time:12.917(Scan#:891) MassPeaks:93  
RawMode:Single 12.917(891) BasePeak:71.00(146338)  
BG Mode:None Group 1 - Event 1

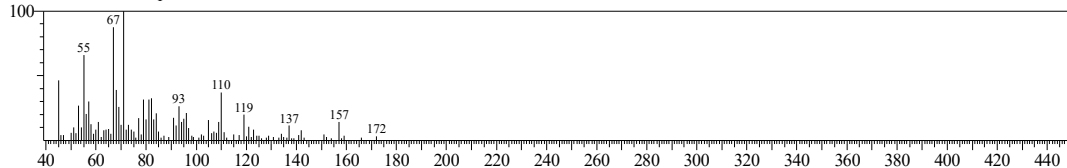

Hit#1 Entry:12731 Library:NIST11.lib

SE:87 Formula:C10H18O2 CAS:64142-78-5 MolWeight:170 RetIndex:1325

CompName:2,7-Octadiene-1,6-diol, 2,6-dimethyl- \$\$ 8-Hydroxylinalool \$\$ 2,6-Dimethyl-2,7-octadiene-1,6-diol \$\$

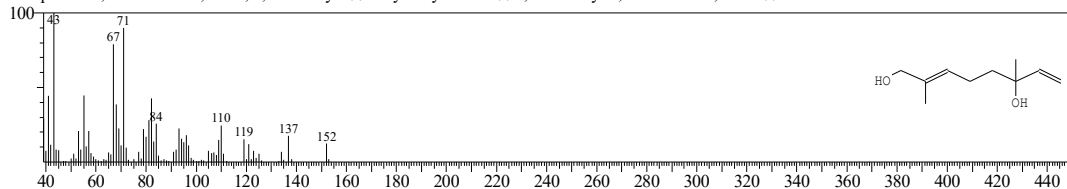

Hit#2 Entry:25783 Library:NIST11.lib

SE:79 Formula:C10H18O2 CAS:26489-17-8 MolWeight:170 RetIndex:1471

CompName:2,6-Octadiene-1,8-diol, 2,6-dimethyl- \$\$ (2Z,6Z)-2,6-Dimethyl-2,6-octadiene-1,8-diol # \$\$

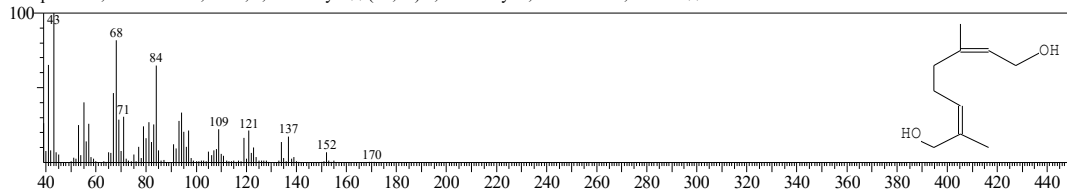

Hit#3 Entry:82697 Library:NIST11.lib

SE:79 Formula:C16H30O2 CAS:0-00-0 MolWeight:254 RetIndex:1792

CompName:1,2-15,16-Diepoxyhexadecane \$\$ 2-[12-(2-Oxiranyl)dodecyl]oxirane # \$\$

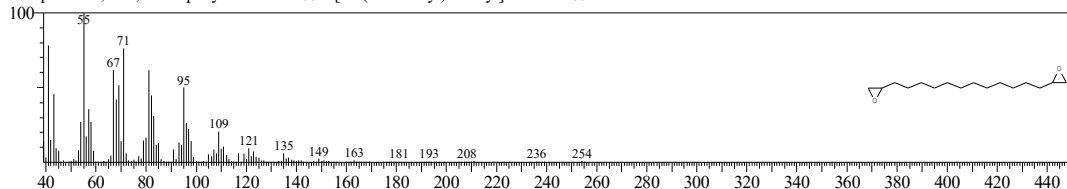

Hit#4 Entry:32923 Library:NIST11.lib

SE:78 Formula:C12H22O CAS:72845-33-1 MolWeight:182 RetIndex:1181

CompName:1,6-Octadiene, 3-ethoxy-3,7-dimethyl- \$\$ 3-Ethoxy-3,7-dimethyl-1,6-octadiene \$\$ Ethyl linalool \$\$

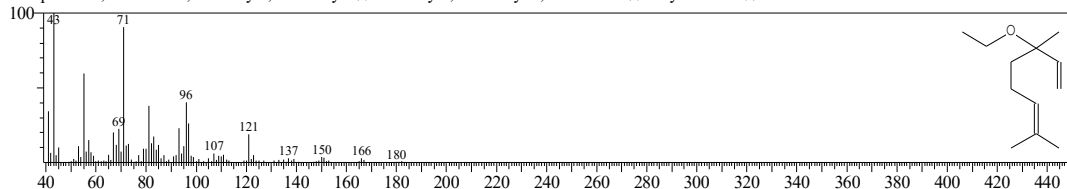

Hit#5 Entry:49565 Library:NIST11.lib

SE:77 Formula:C14H24O CAS:0-00-0 MolWeight:208 RetIndex:1663

CompName:13-Tetradec-11-yn-1-ol \$\$ 13-Tetradecen-11-yn-1-ol # \$\$

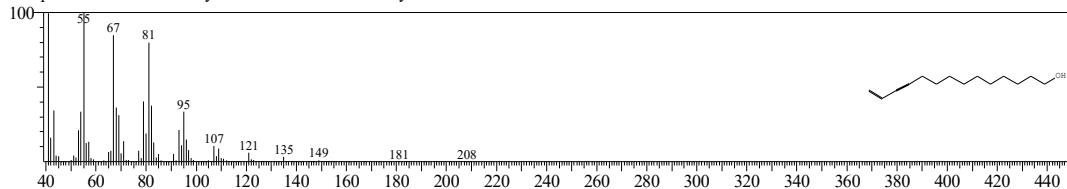

&lt;&lt; Target &gt;&gt;

Line#:7 R.Time:13.900(Scan#:1009) MassPeaks:106  
RawMode:Single 13.900(1009) BasePeak:136.00(604937)  
BG Mode:None Group 1 - Event 1

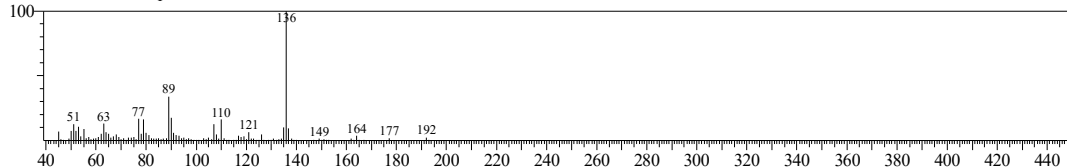

Hit#1 Entry:11540 Library:NIST11s.lib

SI:79 Formula:C<sub>9</sub>H<sub>8</sub>O<sub>3</sub> CAS:7310-95-4 MolWeight:164 RetIndex:1617

CompName:2-Hydroxy-5-methylisophthalaldehyde \$\$ 1,3-Benzenedicarboxaldehyde, 2-hydroxy-5-methyl- \$\$

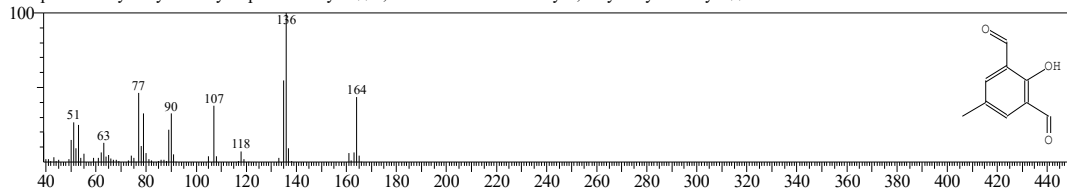

Hit#2 Entry:22111 Library:NIST11.lib

SI:78 Formula:C<sub>9</sub>H<sub>8</sub>O<sub>3</sub> CAS:7310-95-4 MolWeight:164 RetIndex:1617

CompName:2-Hydroxy-5-methylisophthalaldehyde \$\$ 1,3-Benzenedicarboxaldehyde, 2-hydroxy-5-methyl- \$\$

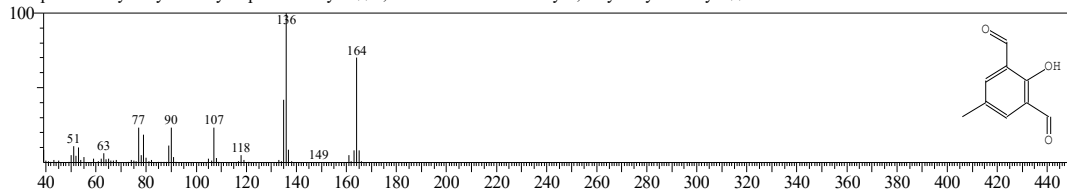

Hit#3 Entry:56489 Library:NIST11.lib

SI:77 Formula:C<sub>9</sub>H<sub>9</sub>N<sub>5</sub>O<sub>2</sub> CAS:339302-07-7 MolWeight:219 RetIndex:0

CompName:Phenol, 2-methoxy-4-[(tetrazol-1-ylimino)methyl]- \$\$ 2-Methoxy-4-[(E)-(1H-tetrazol-1-ylimino)methyl]phenol # \$\$

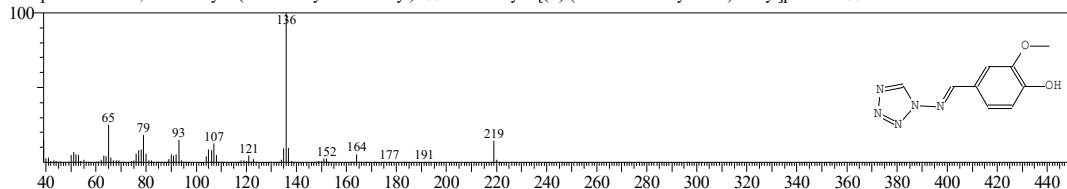

Hit#4 Entry:22854 Library:NIST11.lib

SI:77 Formula:C<sub>10</sub>H<sub>15</sub>NO CAS:39590-27-7 MolWeight:165 RetIndex:1425

CompName:2-Ethoxyphenethylamine \$\$ 2-(2-Ethoxyphenyl)ethanamine # \$\$

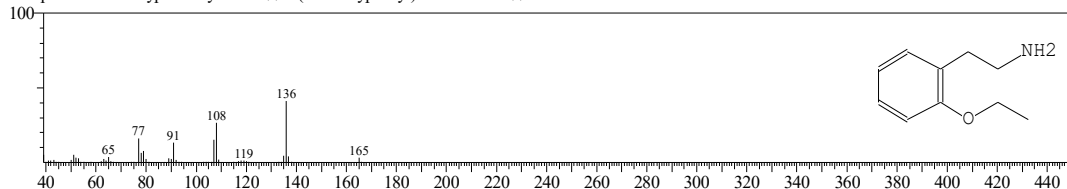

Hit#5 Entry:9536 Library:NIST11.lib

SI:75 Formula:C<sub>8</sub>H<sub>8</sub>O<sub>2</sub> CAS:90111-15-2 MolWeight:136 RetIndex:1316

CompName:3-Hydroxy-2-methylbenzaldehyde

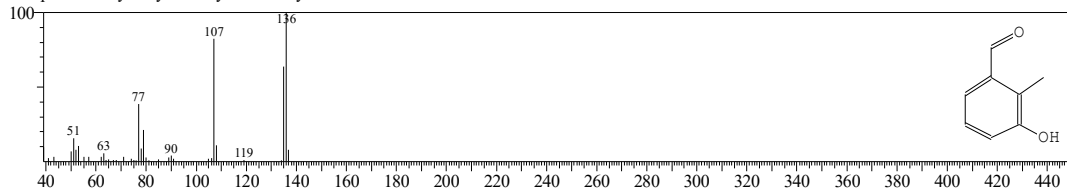

&lt;&lt; Target &gt;&gt;

Line#:8 R.Time:14.767(Scan#:1113) MassPeaks:118  
RawMode:Single 14.767(1113) BasePeak:151.00(200178)  
BG Mode:None Group 1 - Event 1

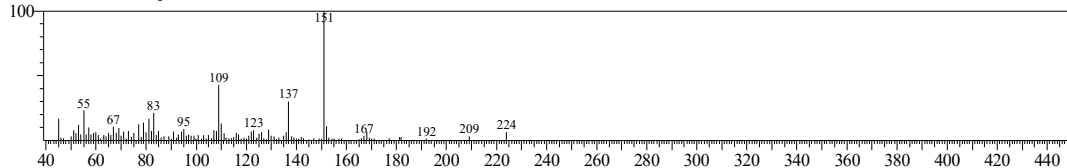

Hit#:1 Entry:64618 Library:NIST11.lib

SE:72 Formula:C10H15BrO CAS:64161-50-8 MolWeight:230 RetIndex:1417

CompName:Bicyclo[2.2.1]heptan-2-one, 1-(bromomethyl)-, 7,7-dimethyl-, (1S)- \$S\$ 1-(Bromomethyl)-7,7-dimethylbicyclo[2.2.1]heptan-2-one # \$S\$

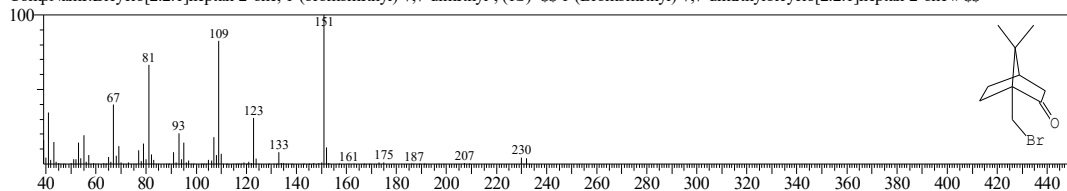

Hit#:2 Entry:62318 Library:NIST11.lib

SE:72 Formula:C14H26O2 CAS:126-86-3 MolWeight:226 RetIndex:1485

CompName:2,4,7,9-Tetramethyl-5-decyn-4,7-diol \$S\$ 2,4,7,9-Tetramethyl-5-decyn-4,7-diol \$S\$ 5-Decyne-4,7-diol, 2,4,7,9-tetramethyl- \$S\$ Surfyol 104 \$S\$ Surfy

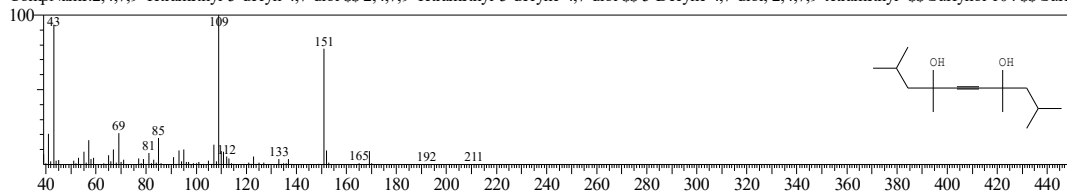

Hit#:3 Entry:31663 Library:NIST11.lib

SE:71 Formula:C12H20O CAS:62338-24-3 MolWeight:180 RetIndex:1317

CompName:Ethanone, 1-(4,5-diethyl-2-methyl-1-cyclopenten-1-yl)- \$S\$ 1-(4,5-Diethyl-2-methyl-1-cyclopenten-1-yl)ethanone # \$S\$

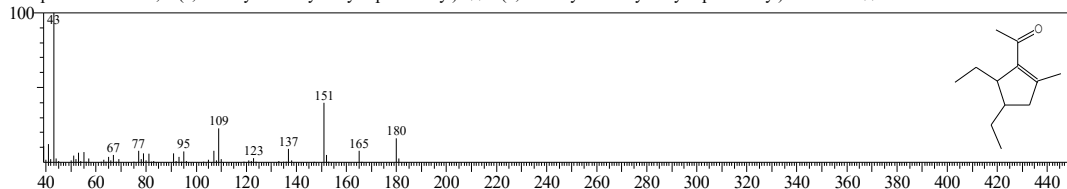

Hit#:4 Entry:40152 Library:NIST11.lib

SE:71 Formula:C12H18O2 CAS:0-00-0 MolWeight:194 RetIndex:1323

CompName:6-(3,3-Dimethyl-oxiran-2-ylidene)-5,5-dimethyl-hex-3-en-2-one \$S\$ (3E,6Z)-6-(3,3-Dimethyl-2-oxiranylidene)-5,5-dimethyl-3-hexen-2-one # \$S\$

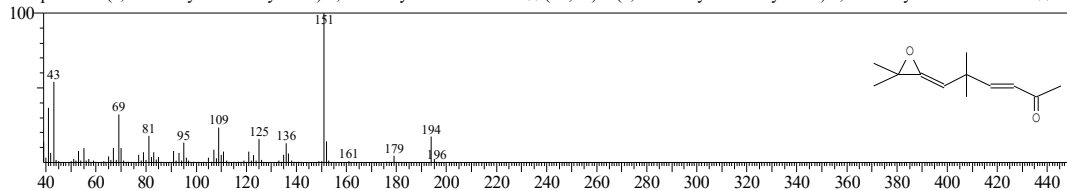

Hit#:5 Entry:20700 Library:NIST11s.lib

SE:71 Formula:C14H26O2 CAS:126-86-3 MolWeight:226 RetIndex:1485

CompName:2,4,7,9-Tetramethyl-5-decyn-4,7-diol \$S\$ 2,4,7,9-Tetramethyl-5-decyn-4,7-diol \$S\$ 5-Decyne-4,7-diol, 2,4,7,9-tetramethyl- \$S\$ Surfyol 104 \$S\$ Surfy

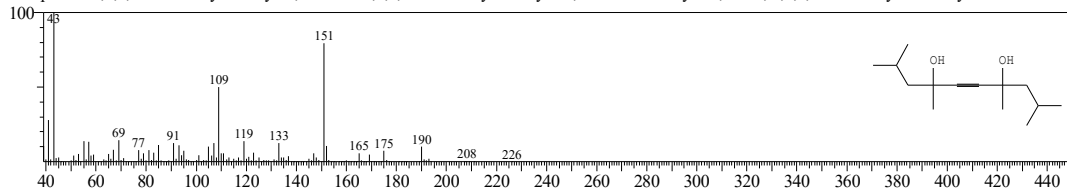



&lt;&lt; Target &gt;&gt;

Line#:9 R.Time:14.983(Scan#:1139) MassPeaks:126  
RawMode:Single 14.983(1139) BasePeak:180.00(227812)  
BG Mode:None Group 1 - Event 1

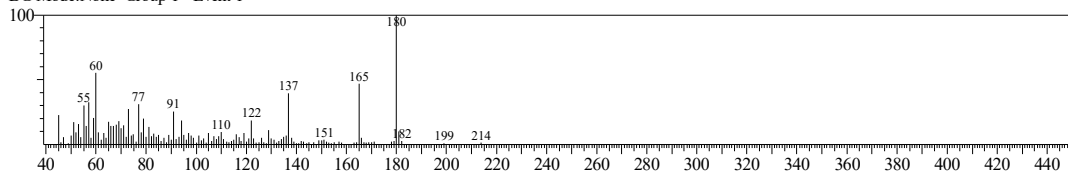

Hit#:1 Entry:81228 Library:NIST11.lib

SE:65 Formula:C16H28O2 CAS:459-67-6 MolWeight:252 RetIndex:1993

CompName:11-(2-Cyclopenten-1-yl)undecanoic acid, (+)- \$\$ Hydnocarpic acid \$\$ 2-Cyclopentene-1-undecanoic acid \$\$ Isolated from chaulmoogra oil \$\$ 11-(2

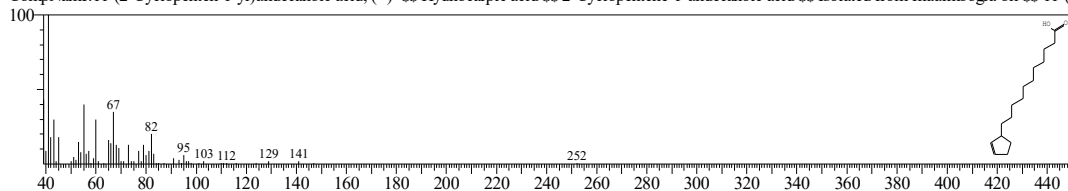

Hit#:2 Entry:31435 Library:NIST11.lib

SE:64 Formula:C10H12O3 CAS:54644-27-8 MolWeight:180 RetIndex:1580

CompName:1,2,4-Cyclopentanetrione, 3-(2-pentenyl)- \$\$ 3-[(2E)-2-Pentenyl]-1,2,4-cyclopentanetrione # \$\$

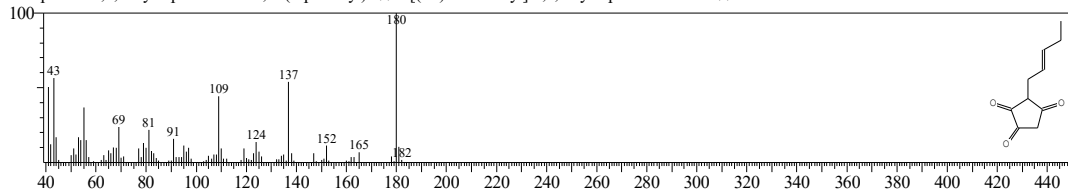

Hit#:3 Entry:14404 Library:NIST11.lib

SE:64 Formula:C10H12O3 CAS:54644-27-8 MolWeight:180 RetIndex:1580

CompName:1,2,4-Cyclopentanetrione, 3-(2-pentenyl)- \$\$ 3-[(2E)-2-Pentenyl]-1,2,4-cyclopentanetrione # \$\$

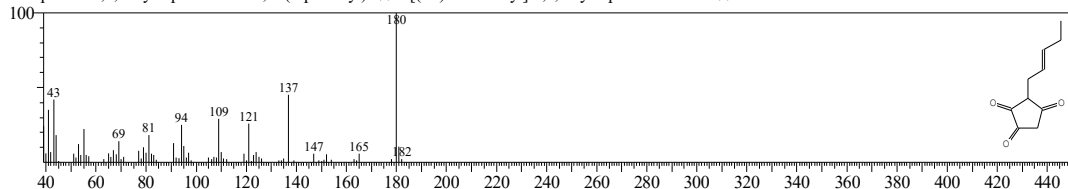

Hit#:4 Entry:31655 Library:NIST11.lib

SE:64 Formula:C12H20O CAS:77822-49-2 MolWeight:180 RetIndex:1157

CompName:Furan, 2,3-dihydro-2,2-dimethyl-3-(1-methylethenyl)-5-(1-methylethyl)- \$\$ 3-Isopropenyl-5-isopropyl-2,2-dimethyl-2,3-dihydrofuran # \$\$

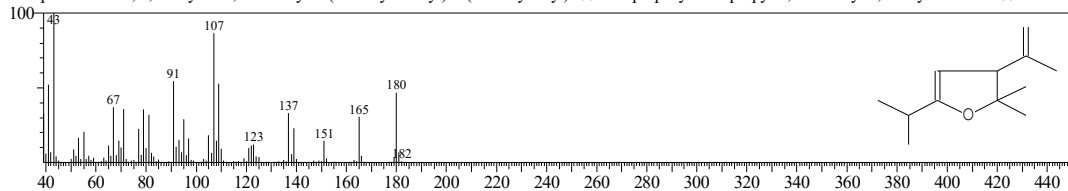

Hit#:5 Entry:31479 Library:NIST11.lib

SE:64 Formula:C11H16O2 CAS:15051-75-9 MolWeight:180 RetIndex:1345

CompName:3-Hydroxymethylene-1,7,7-trimethylbicyclo[2.2.1]heptan-2-one \$\$ 3-(3E)-3-(Hydroxymethylene)-1,7,7-trimethylbicyclo[2.2.1]heptan-2-one # \$\$

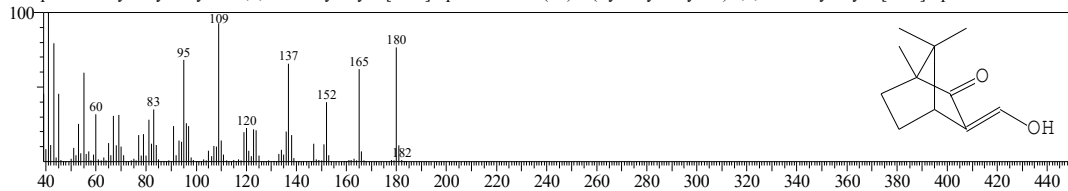

&lt;&lt; Target &gt;&gt;

Line#:10 R.Time:15.400(Scan#:1189) MassPeaks:125  
RawMode:Single 15.400(1189) BasePeak:55.00(769118)  
BG Mode:None Group 1 - Event 1

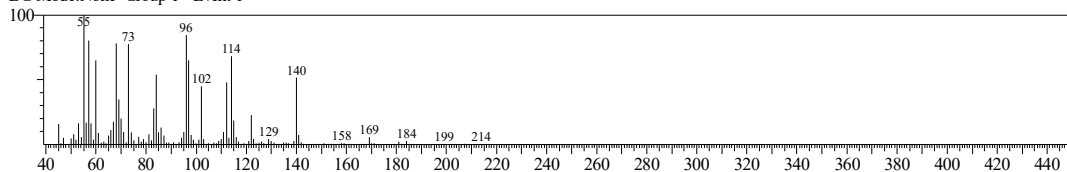

Hit#:1 Entry:19273 Library:NIST11.lib  
SE:75 Formula:C8H14O3 CAS:15458-61-4 MolWeight:158 RetIndex:1347  
CompName:9-Oxabicyclo[3.3.1]nonane-2,6-diol

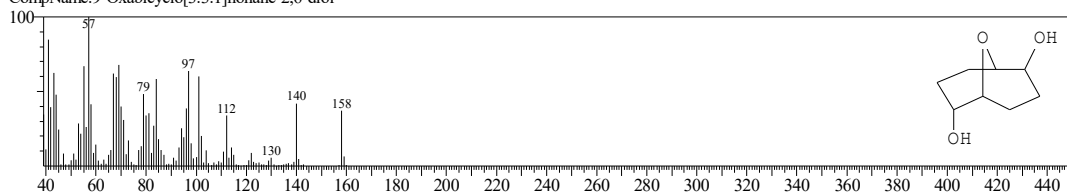

Hit#:2 Entry:4003 Library:NIST11.lib  
SE:74 Formula:C6H10O2 CAS:0-00-0 MolWeight:114 RetIndex:982  
CompName:cis-3-Hexenoic acid (3Z)-3-Hexenoic acid # 55

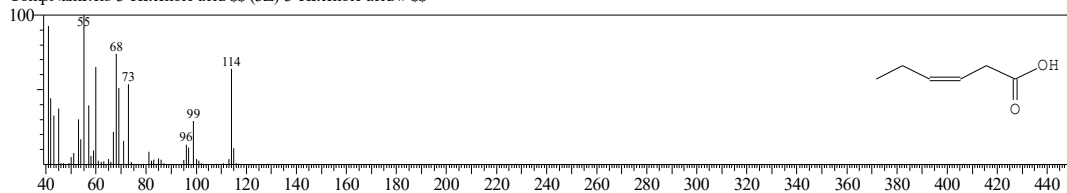

Hit#:3 Entry:33864 Library:NIST11.lib  
SE:73 Formula:C11H20O2 CAS:4189-02-0 MolWeight:184 RetIndex:1479  
CompName:2-Undecenoic acid (Z)-2-Undecenoic acid # 55

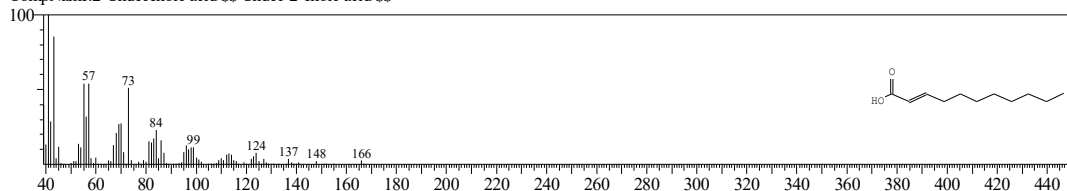

Hit#:4 Entry:11110 Library:NIST11.lib  
SE:73 Formula:C8H12O2 CAS:19740-79-5 MolWeight:140 RetIndex:1142  
CompName:9-Oxabicyclo[3.3.1]nonan-2-one

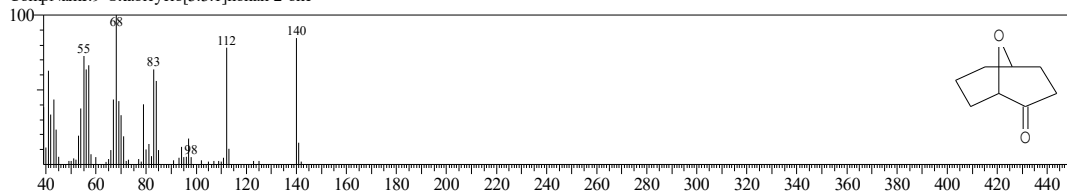

Hit#:5 Entry:33865 Library:NIST11.lib  
SE:72 Formula:C11H20O2 CAS:15790-94-0 MolWeight:184 RetIndex:1479  
CompName:trans-2-undecenoic acid (2E)-2-Undecenoic acid # 55

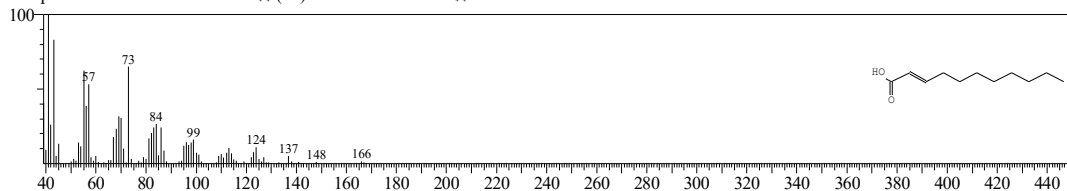

&lt;&lt; Target &gt;&gt;

Line#:11 R.Time:15.800(Scan#:1237) MassPeaks:136  
RawMode:Single 15.800(1237) BasePeak:108.00(1405748)  
BG Mode:None Group 1 - Event 1

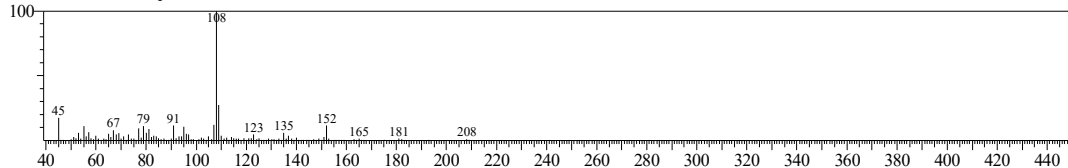

Hit#1 Entry:49452 Library:NIST11.lib

SE:87 Formula:C13H20O2 CAS:52210-15-8 MolWeight:208 RetIndex:1627

CompName:2-Cyclohexen-1-one, 4-(3-hydroxy-1-butenyl)-3,5,5-trimethyl-, [R-[R\*,R\*-(E)]]- \$S\$ 2-Cyclohexen-1-one, 4-[(1E,3R)-3-hydroxy-1-buten-1-yl]-3,5,

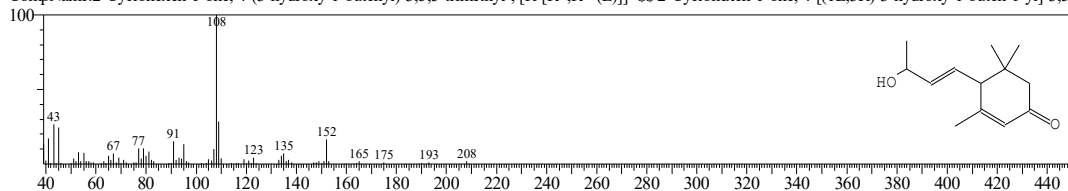

Hit#2 Entry:49451 Library:NIST11.lib

SE:86 Formula:C13H20O2 CAS:34318-21-3 MolWeight:208 RetIndex:1627

CompName:2-Cyclohexen-1-one, 4-(3-hydroxy-1-butenyl)-3,5,5-trimethyl- \$S\$ 3-Oxo-.alpha.-ionol \$S\$ 4-(3-Hydroxy-1-butenyl)-3,5,5-trimethyl-2-cyclohexen-1-

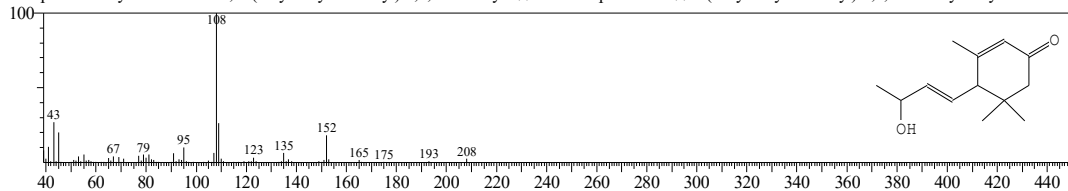

Hit#3 Entry:9560 Library:NIST11.lib

SE:81 Formula:C10H16O CAS:4501-58-0 MolWeight:152 RetIndex:1155

CompName:.alpha.-Campholenal \$S\$ (R)-.alpha.-Campholene aldehyde \$S\$ 3-Cyclopentene-1-acetaldehyde, 2,2,3-trimethyl- \$S\$ .alpha.-Campholene aldehyde \$S\$

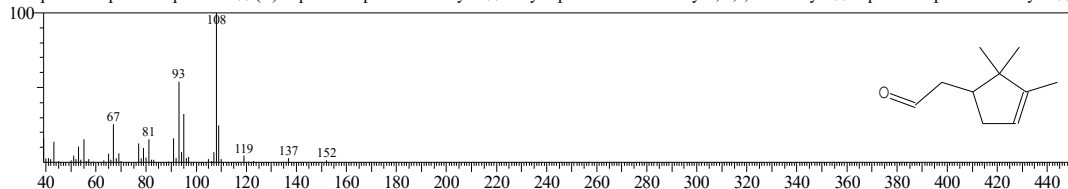

Hit#4 Entry:16472 Library:NIST11.lib

SE:80 Formula:C10H16O CAS:4501-58-0 MolWeight:152 RetIndex:1155

CompName:.alpha.-Campholenal \$S\$ (R)-.alpha.-Campholene aldehyde \$S\$ 3-Cyclopentene-1-acetaldehyde, 2,2,3-trimethyl- \$S\$ .alpha.-Campholene aldehyde \$S\$

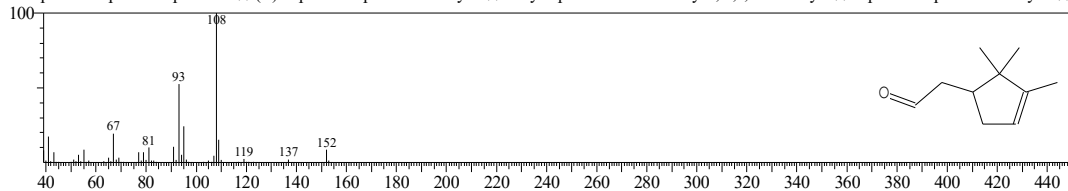

Hit#5 Entry:9561 Library:NIST11.lib

SE:78 Formula:C10H16O CAS:4501-58-0 MolWeight:152 RetIndex:1155

CompName:.alpha.-Campholenal \$S\$ (R)-.alpha.-Campholene aldehyde \$S\$ 3-Cyclopentene-1-acetaldehyde, 2,2,3-trimethyl- \$S\$ .alpha.-Campholene aldehyde \$S\$

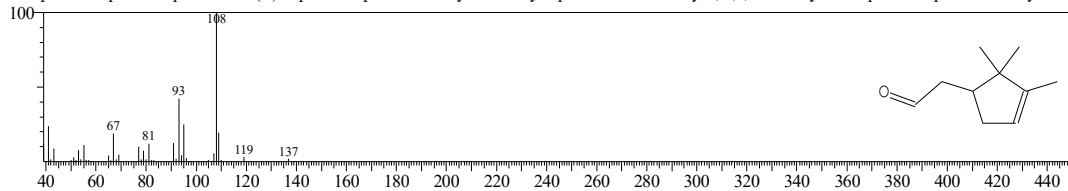

&lt;&lt; Target &gt;&gt;

Line#:12 R.Time:16.050(Scan#:1267) MassPeaks:137

RawMode:Single 16.050(1267) BasePeak:60.00(317902)

BG Mode:None Group 1 - Event 1

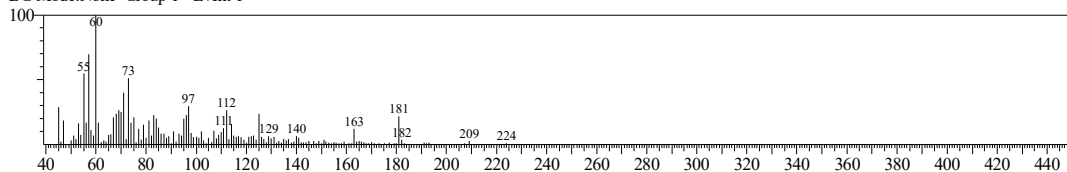

Hit#:1 Entry:51953 Library:NIST11.lib

SE:75 Formula:C11H16O4 CAS:117132-08-8 MolWeight:212 RetIndex:1610

CompName:9,9-Dimethoxybicyclo[3.3.1]nona-2,4-dione \$\$ 9,9-Dimethoxybicyclo[3.3.1]nonane-2,4-dione # \$\$

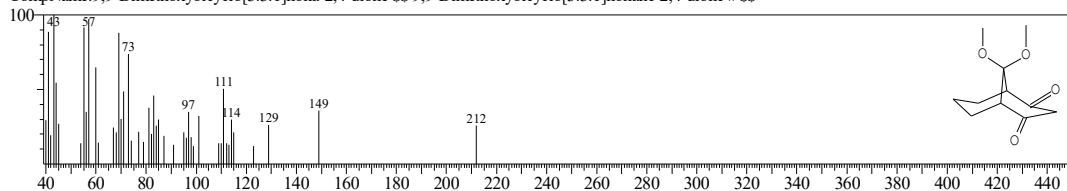

Hit#:2 Entry:25037 Library:NIST11.lib

SE:73 Formula:C18H34O2 CAS:112-80-1 MolWeight:282 RetIndex:2175

CompName:Oleic Acid \$\$ 9-Octadecenoic acid (Z)- \$\$ .DELTA.-9-cis-Oleic acid \$\$ cis-Oleic Acid \$\$ cis-Octadecenoic Acid \$\$ Emersol 211 \$\$ Emersol 220 V

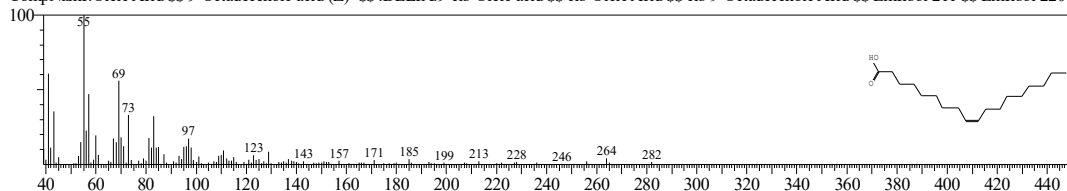

Hit#:3 Entry:205078 Library:NIST11.lib

SE:73 Formula:C18H32O16 CAS:597-12-6 MolWeight:504 RetIndex:4506

CompName:.alpha.-D-Glucopyranoside, O-.alpha.-D-glucopyranosyl-(1.fwdarw.3)-.beta.-D-fructofuranosyl \$\$ Glucopyranoside, O-.alpha.-D-glucopyranosyl-(1

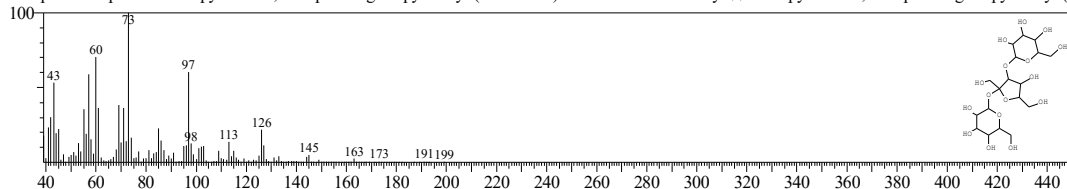

Hit#:4 Entry:84362 Library:NIST11.lib

SE:72 Formula:C16H32O2 CAS:57-10-3 MolWeight:256 RetIndex:1968

CompName:n-Hexadecanoic acid \$\$ Hexadecanoic acid \$\$ n-Hexadecic acid \$\$ Palmitic acid \$\$ Pentadecanecarboxylic acid \$\$ 1-Pentadecanecarboxylic acid

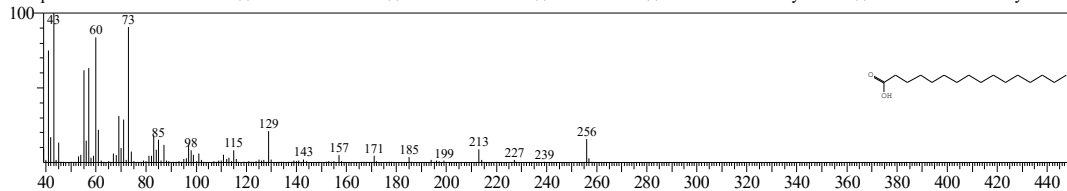

Hit#:5 Entry:10618 Library:NIST11s.lib

SE:72 Formula:C9H18O2 CAS:112-05-0 MolWeight:158 RetIndex:1272

CompName:Nonanoic acid \$\$ n-Nonanoic acid \$\$ n-Nonoic acid \$\$ n-Nonylic acid \$\$ Nonoic acid \$\$ Nonylic acid \$\$ Pelargic acid \$\$ Pelargonic acid \$\$ 1-Oc

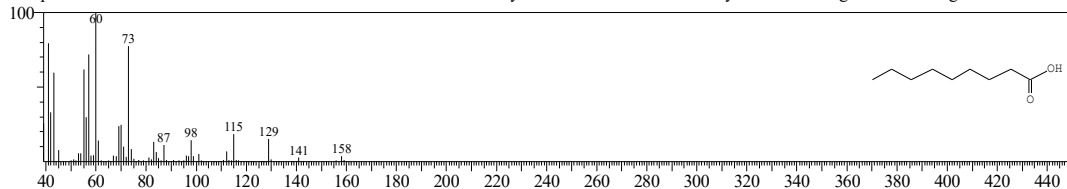

&lt;&lt; Target &gt;&gt;

Line#:13 R.Time:16.300(Scan#:1297) MassPeaks:134  
RawMode:Single 16.300(1297) BasePeak:93.00(198199)  
BG Mode:None Group 1 - Event 1

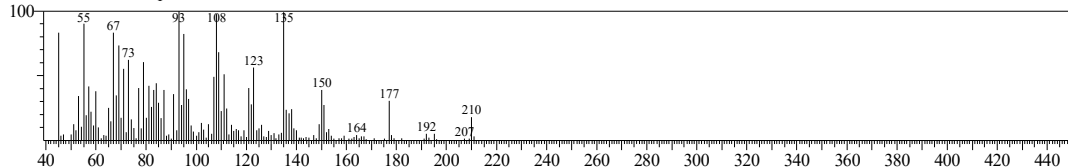

Hit#1 Entry:50842 Library:NIST11.lib

SE:87 Formula:C13H22O2 CAS:36151-02-7 MolWeight:210 RetIndex:1619

CompName:2-Cyclohexen-1-one, 4-(3-hydroxybutyl)-3,5,5-trimethyl- \$3-Oxo-7,8-dihydro-.alpha.-ionol \$ Blumenol C \$ 4-(3-Hydroxybutyl)-3,5,5-trimethyl

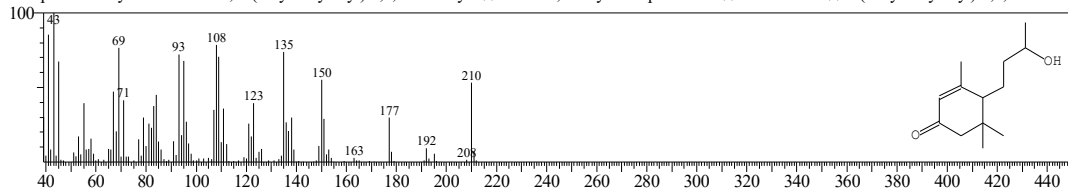

Hit#2 Entry:48074 Library:NIST11.lib

SE:73 Formula:C15H26 CAS:62337-96-6 MolWeight:206 RetIndex:1369

CompName:Cyclohexane, 1,1,2-trimethyl-3,5-bis(1-methylethenyl)-, (2.alpha.,3.alpha.,5.beta.)- \$3,5-Diisopropenyl-1,1,2-trimethylcyclohexane, (2.alpha.,3.alpha.,5.beta.)-

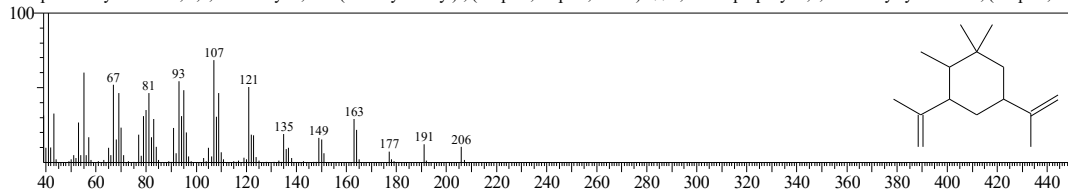

Hit#3 Entry:24813 Library:NIST11.lib

SE:73 Formula:C11H20O CAS:0-00-0 MolWeight:168 RetIndex:1459

CompName:6-Methyl-cyclodec-5-enol \$6-Methyl-5-cyclodecen-1-ol # \$

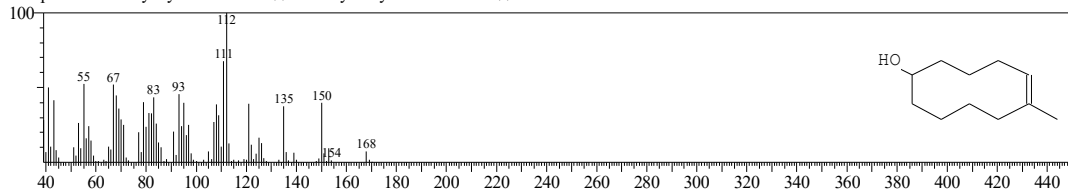

Hit#4 Entry:24762 Library:NIST11.lib

SE:73 Formula:C11H20O CAS:54972-52-0 MolWeight:168 RetIndex:1363

CompName:1-Naphthalenol, decahydro-4a-methyl- \$4a-Methyldecahydro-1-naphthalenol # \$

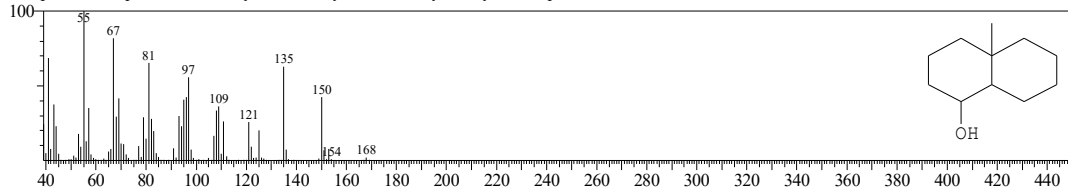

Hit#5 Entry:24748 Library:NIST11.lib

SE:73 Formula:C11H20O CAS:78996-11-9 MolWeight:168 RetIndex:1266

CompName:(2,2,6-Trimethyl-bicyclo[4.1.0]hept-1-yl)-methanol

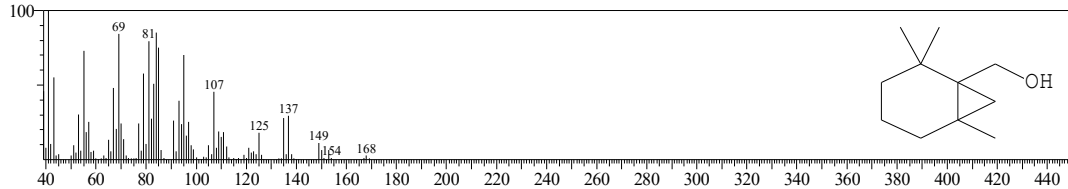

&lt;&lt; Target &gt;&gt;

Line#:14 R.Time:17.067(Scan#:1389) MassPeaks:149

RawMode:Single 17.067(1389) BasePeak:124.00(3408422)

BG Mode:None Group 1 - Event 1

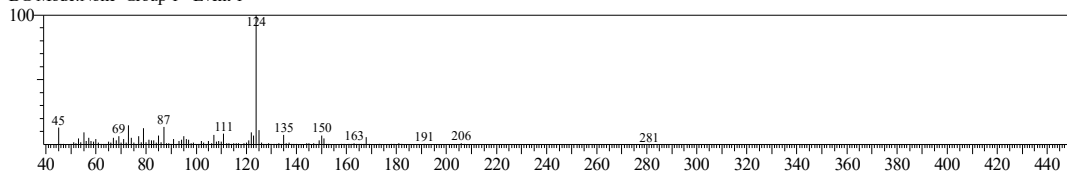

Hit#:1 Entry:31721 Library:NIST11.lib

SI:75 Formula:C12H20O CAS:54344-82-0 MolWeight:180 RetIndex:1309

CompName:5,5,8a-Trimethyl-3,5,6,7,8,8a-hexahydro-2H-chromene

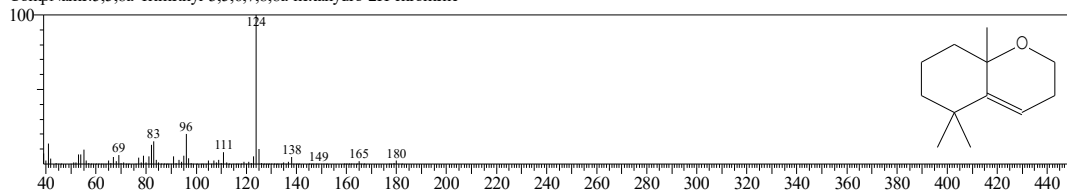

Hit#:2 Entry:30869 Library:NIST11.lib

SI:75 Formula:C12H21N CAS:0-00-0 MolWeight:179 RetIndex:1328

CompName:2,3-Bis(1-methylallyl)pyrrolidine

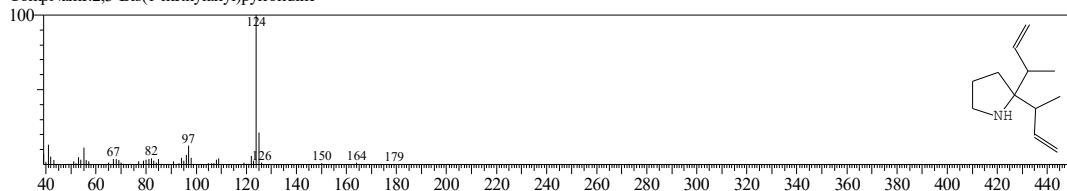

Hit#:3 Entry:47203 Library:NIST11.lib

SI:74 Formula:C14H23N CAS:20144-36-9 MolWeight:205 RetIndex:1703

CompName:Bis(cyclohex-3-enylmethyl)amine \$\$ 3-Cyclohexen-1-yl-N-(3-cyclohexen-1-ylmethyl)methanamine # \$\$

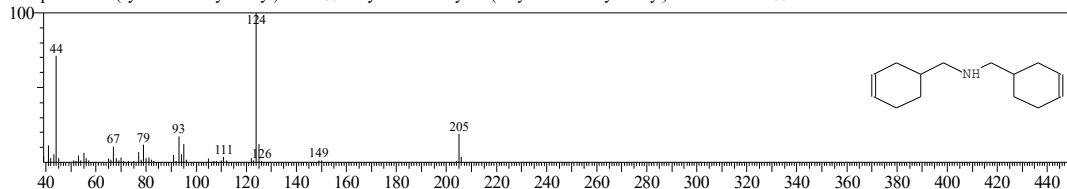

Hit#:4 Entry:32857 Library:NIST11.lib

SI:72 Formula:C11H18O2 CAS:0-00-0 MolWeight:182 RetIndex:1368

CompName:2,6,8-Trimethylbicyclo[4.2.0]oct-2-ene-1,8-diol

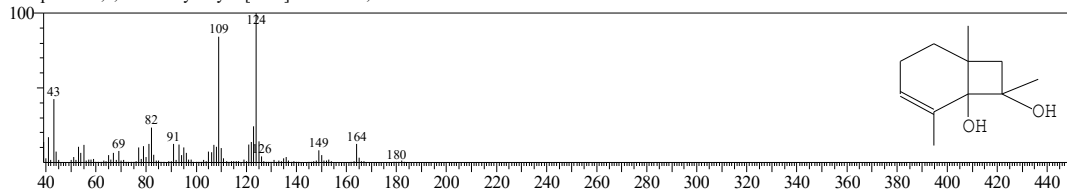

Hit#:5 Entry:24582 Library:NIST11s.lib

SI:71 Formula:C16H21NO3 CAS:87-00-3 MolWeight:275 RetIndex:2138

CompName:Homatropine \$\$ Benzenecetic acid, .alpha.-hydroxy-, 8-methyl-8-azabicyclo[3.2.1]oct-3-yl ester, endo-(+/-)- \$\$ 1.alpha.H,5.alpha.H-Tropan-3-.al

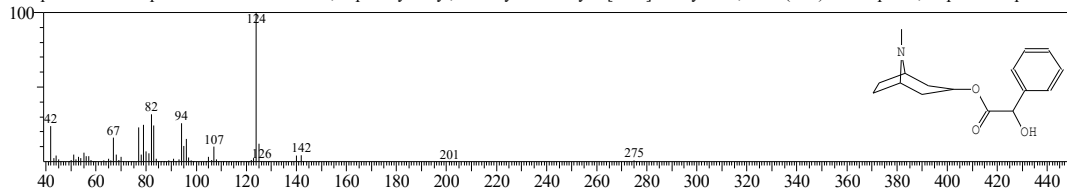

&lt;&lt; Target &gt;&gt;

Line#:15 R.Time:17.517(Scan#:1443) MassPeaks:152  
RawMode:Single 17.517(1443) BasePeak:73.00(871140)  
BG Mode:None Group 1 - Event 1

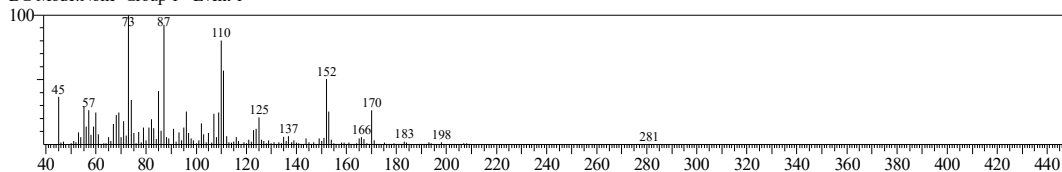

Hit#1 Entry:135733 Library:NIST11.lib  
SE:71 Formula:C21H38O2 CAS:56687-68-4 MolWeight:322 RetIndex:2203  
CompName:[1,1'-Bicyclopropyl]-2-octanoic acid, 2'-hexyl-, methyl ester

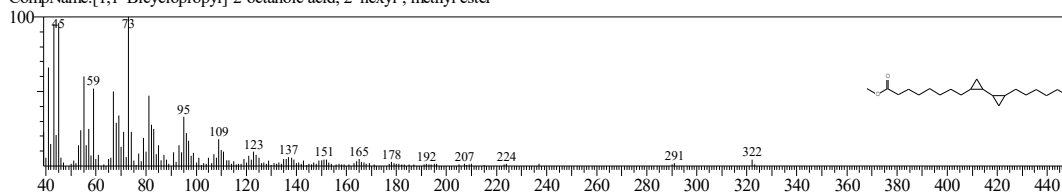

Hit#2 Entry:33760 Library:NIST11.lib  
SE:69 Formula:C10H16O3 CAS:26845-42-1 MolWeight:184 RetIndex:1417  
CompName:Cyclohexanepropanoic acid, 3-oxo-, methyl ester \$\$ Methyl 3-(3-oxocyclohexyl)propanoate # \$\$

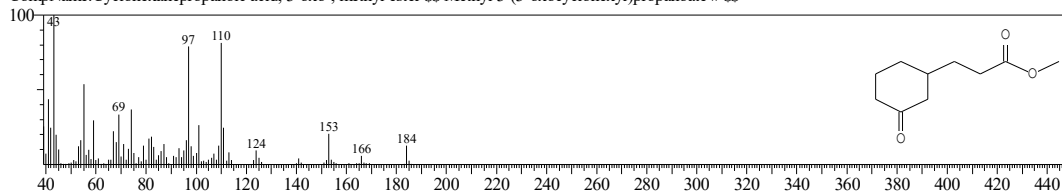

Hit#3 Entry:33908 Library:NIST11.lib  
SE:66 Formula:C11H20O2 CAS:0-00-0 MolWeight:184 RetIndex:1203  
CompName:(S)-(-)-Citronellic acid, methyl ester

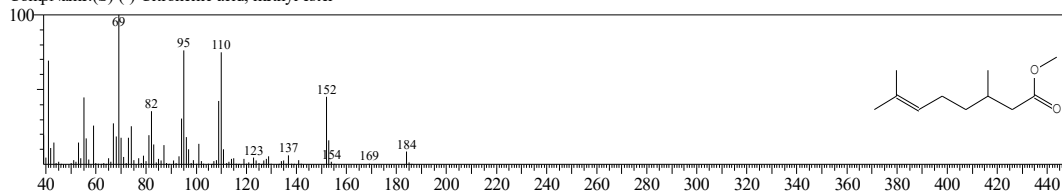

Hit#4 Entry:24506 Library:NIST11.lib  
SE:65 Formula:C10H16O2 CAS:86428-60-6 MolWeight:168 RetIndex:1407  
CompName:4-Acetylcycloheptanone \$\$ 4-(2-Oxopropyl)cycloheptanone # \$\$

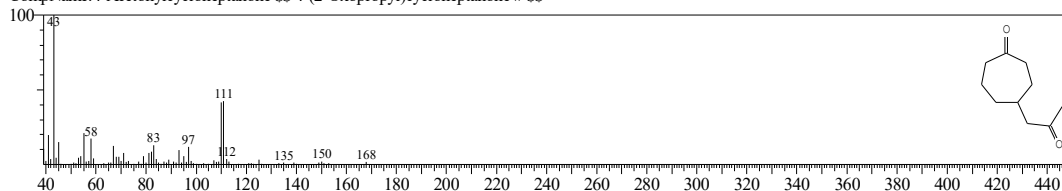

Hit#5 Entry:62263 Library:NIST11.lib  
SE:65 Formula:C14H26O2 CAS:0-00-0 MolWeight:226 RetIndex:1570  
CompName:Butyl 9-decenoate

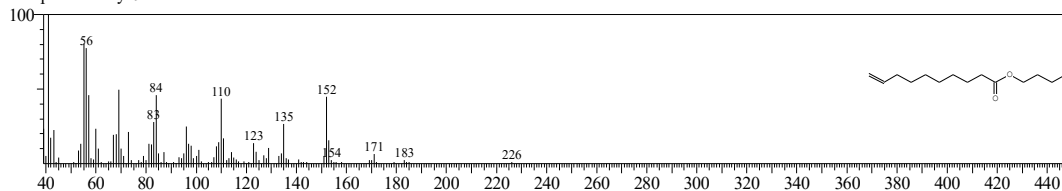

&lt;&lt; Target &gt;&gt;

Line#:16 R.Time:17.883(Scan#:1487) MassPeaks:146

RawMode:Single 17.883(1487) BasePeak:71.00(116306)

BG Mode:None Group 1 - Event 1

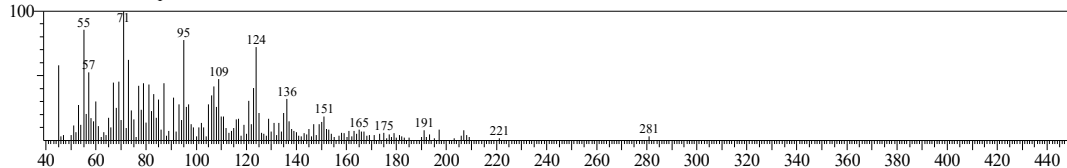

Hit#:1 Entry:135733 Library:NIST11.lib

SE:72 Formula:C21H38O2 CAS:56687-68-4 MolWeight:322 RetIndex:2203

CompName:[1,1'-Bicyclopropyl]-2-octanoic acid, 2'-hexyl-, methyl ester

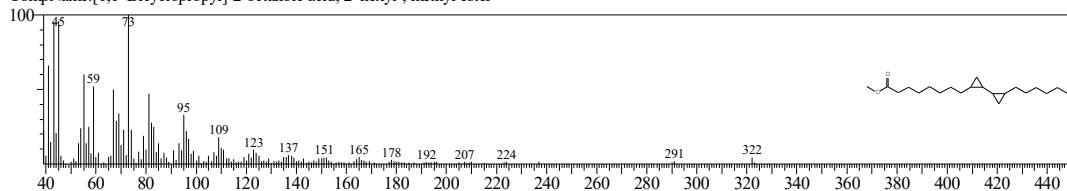

Hit#:2 Entry:126292 Library:NIST11.lib

SE:72 Formula:C18H30O4 CAS:0-00-0 MolWeight:310 RetIndex:2228

CompName:Acetic acid, 2-(2-acetoxy-2,5,5,8a-tetramethyldecalin-1-yl)- \$\$ [2-(Acetyloxy)-2,5,5,8a-tetramethyldecahydro-1-naphthalenyl]acetic acid # \$\$

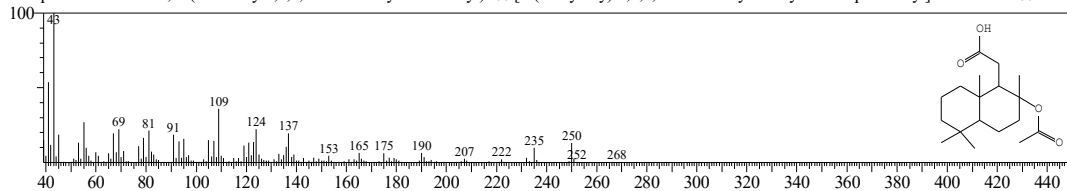

Hit#:3 Entry:49415 Library:NIST11.lib

SE:71 Formula:C13H20O2 CAS:0-00-0 MolWeight:208 RetIndex:1639

CompName:3-(1-Methylhept-1-enyl)-5-methyl-2,5-dihydrofuran-2-one \$\$ 5-Methyl-3-[(1E)-1-methyl-1-heptenyl]-2(5H)-furanone # \$\$

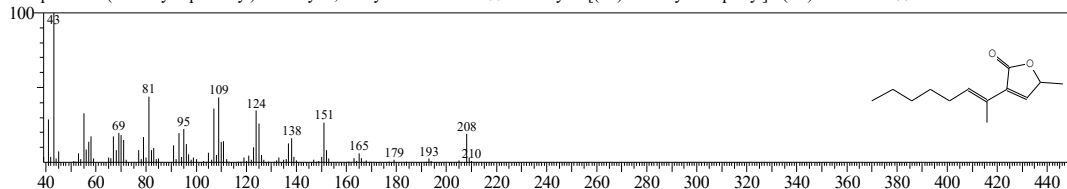

Hit#:4 Entry:57736 Library:NIST11.lib

SE:71 Formula:C15H24O CAS:0-00-0 MolWeight:220 RetIndex:1531

CompName:cis-Z.alpha.-Bisabolene epoxide \$\$ 4-[(1Z)-1,5-Dimethyl-1,4-hexadienyl]-1-methyl-7-oxabicyclo[4.1.0]heptane # \$\$

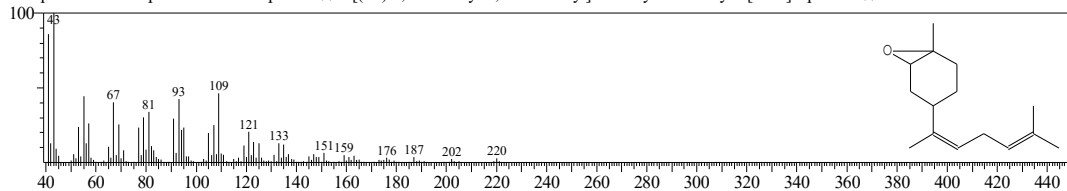

Hit#:5 Entry:69289 Library:NIST11.lib

SE:71 Formula:C15H24O2 CAS:61050-91-7 MolWeight:236 RetIndex:1626

CompName:Spiro[4.5]decan-7-one, 1,8-dimethyl-8,9-epoxy-4-isopropyl-

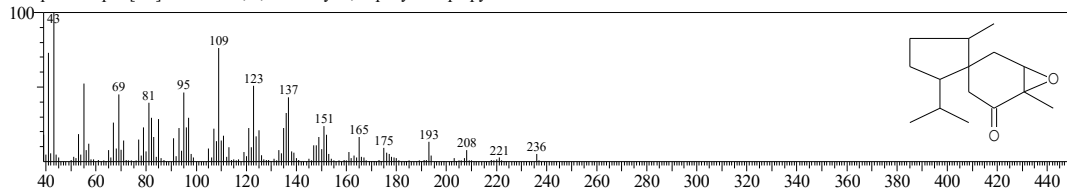



&lt;&lt; Target &gt;&gt;

Line#:17 R.Time:18.033(Scan#:1505) MassPeaks:168

RawMode:Single 18.033(1505) BasePeak:73.00(307407)

BG Mode:None Group 1 - Event 1

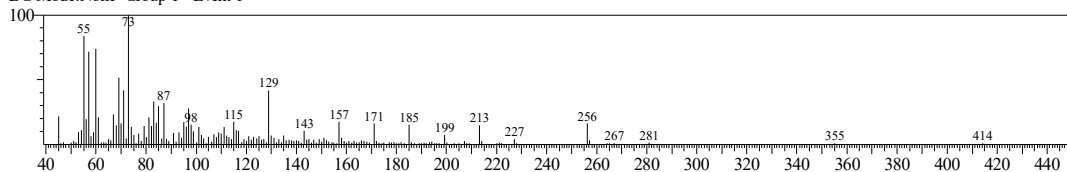

Hit#:1 Entry:23313 Library:NIST11s.lib

SE:88 Formula:C16H32O2 CAS:57-10-3 MolWeight:256 RetIndex:1968

CompName:n-Hexadecanoic acid \$\$ Hexadecanoic acid \$\$ n-Hexadecanoic acid \$\$ Palmitic acid \$\$ Pentadecanecarboxylic acid \$\$ 1-Pentadecanecarboxylic acid

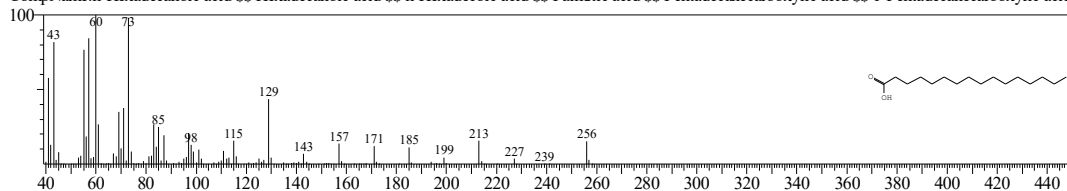

Hit#:2 Entry:128151 Library:NIST11s.lib

SE:87 Formula:C20H40O2 CAS:506-30-9 MolWeight:312 RetIndex:2366

CompName:Eicosanoic acid \$\$ Arachic acid \$\$ Arachidic acid \$\$ Icosanoic acid \$\$ n-Eicosanoic acid \$\$ Arachidic acid (synthetic) \$\$

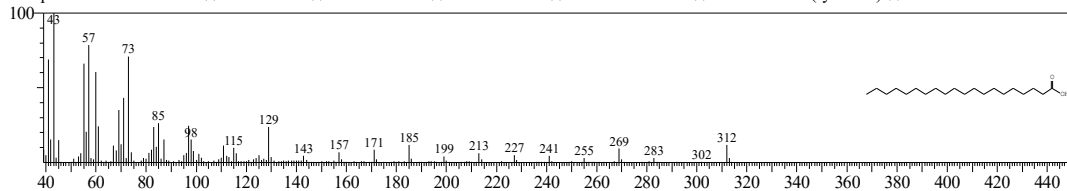

Hit#:3 Entry:211367 Library:NIST11s.lib

SE:86 Formula:C38H68O8 CAS:28474-90-0 MolWeight:652 RetIndex:4765

CompName:l-(+)-Ascorbic acid 2,6-dihexadecanoate

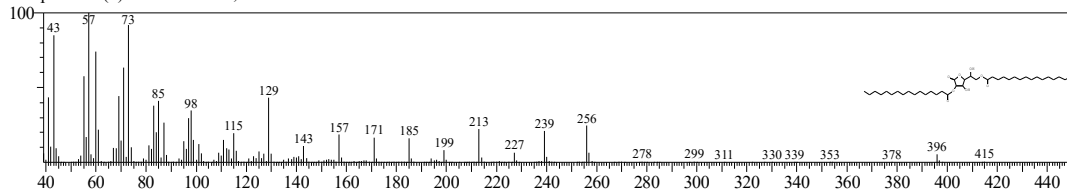

Hit#:4 Entry:73851 Library:NIST11s.lib

SE:86 Formula:C15H30O2 CAS:1002-84-2 MolWeight:242 RetIndex:1869

CompName:Pentadecanoic acid \$\$ Pentadecylic acid \$\$ n-Pentadecanoic acid \$\$ n-Pentadecylic acid \$\$

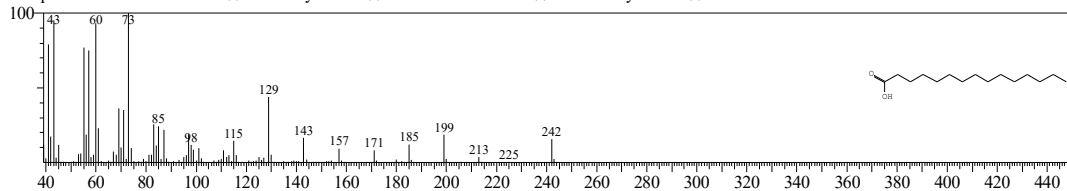

Hit#:5 Entry:23305 Library:NIST11s.lib

SE:85 Formula:C16H32O2 CAS:57-10-3 MolWeight:256 RetIndex:1968

CompName:n-Hexadecanoic acid \$\$ Hexadecanoic acid \$\$ n-Hexadecanoic acid \$\$ Palmitic acid \$\$ Pentadecanecarboxylic acid \$\$ 1-Pentadecanecarboxylic acid

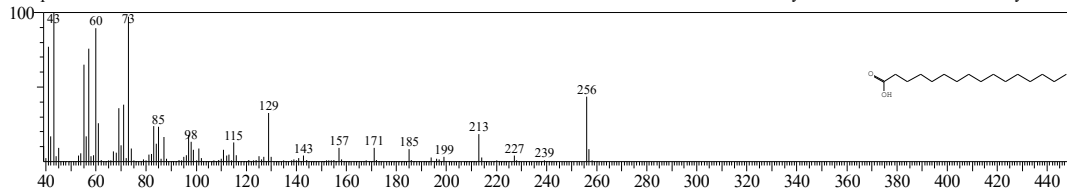

&lt;&lt; Target &gt;&gt;

Line#:18 R.Time:18.167(Scan#:1521) MassPeaks:171

RawMode:Single 18.167(1521) BasePeak:88.00(215396)

BG Mode:None Group 1 - Event 1

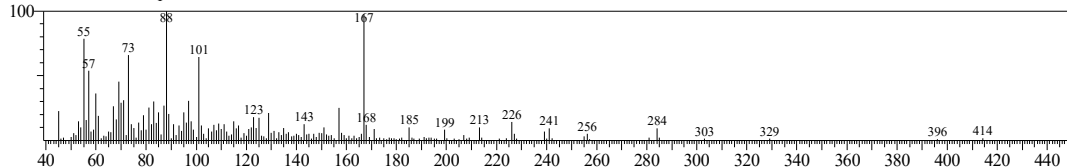

Hit#1 Entry:117162 Library:NIST11.lib

SI:77 Formula:C19H38O2 CAS:0-00-0 MolWeight:298 RetIndex:2013

CompName:Ethyl 14-methyl-hexadecanoate

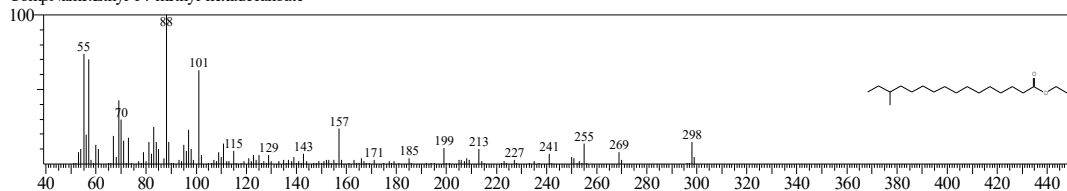

Hit#2 Entry:52287 Library:NIST11.lib

SI:74 Formula:C13H24O2 CAS:692-86-4 MolWeight:212 RetIndex:1471

CompName:10-Undecenoic acid, ethyl ester \$\$ Ethyl undecenoate \$\$ Ethyl undecylenate \$\$ Ethyl 10-undecenoate \$\$ Undecenoic acid, ethyl ester \$\$ Ethyl 10-

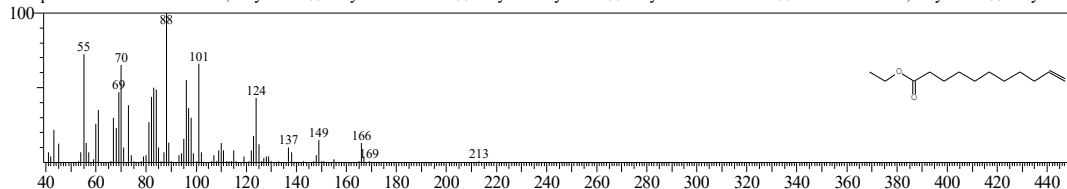

Hit#3 Entry:25180 Library:NIST11.lib

SI:73 Formula:C18H36O2 CAS:628-97-7 MolWeight:284 RetIndex:1978

CompName:Hexadecanoic acid, ethyl ester \$\$ Palmitic acid, ethyl ester \$\$ Ethyl hexadecanoate \$\$ Ethyl palmitate \$\$ Ethyl n-hexadecanoate \$\$

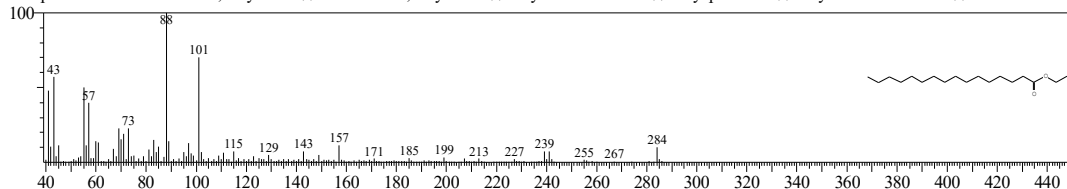

Hit#4 Entry:43826 Library:NIST11.lib

SI:72 Formula:C11H20O3 CAS:3433-16-7 MolWeight:200 RetIndex:1470

CompName:Nonanoic acid, 9-oxo-, ethyl ester \$\$ Ethyl 9-oxononanoate # \$\$

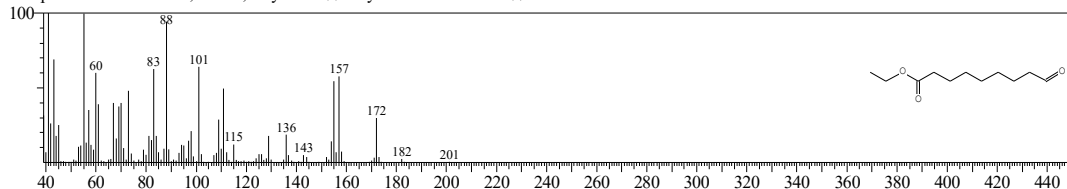

Hit#5 Entry:166830 Library:NIST11.lib

SI:71 Formula:C24H48O2 CAS:5908-87-2 MolWeight:368 RetIndex:2574

CompName:Docosanoic acid, ethyl ester \$\$ Ethyl docosanoate # \$\$

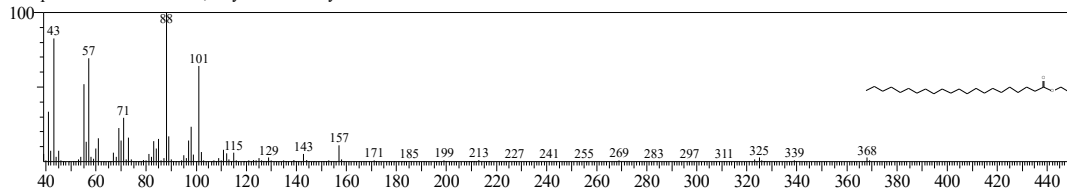

&lt;&lt; Target &gt;&gt;

Line#:19 R.Time:18.475(Scan#:1558) MassPeaks:182  
RawMode:Single 18.475(1558) BasePeak:69.05(741782)  
BG Mode:None Group 1 - Event 1

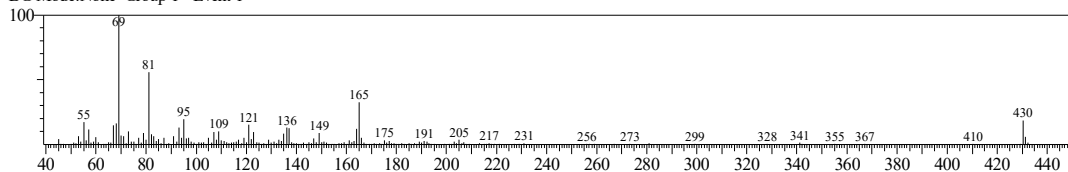

Hit#:1 Entry:30137 Library:NIST11s.lib

SE:67 Formula:C29H50O2 CAS:59-02-9 MolWeight:430 RetIndex:3149

CompName:Vitamin E \$\$ 2H-1-Benzopyran-6-ol, 3,4-dihydro-2,5,7,8-tetramethyl-2-(4,8,12-trimethyltridecyl)-, [2R-[2R\*(4R\*,8R\*)]]- \$\$ .alpha.-Tocopherol \$\$

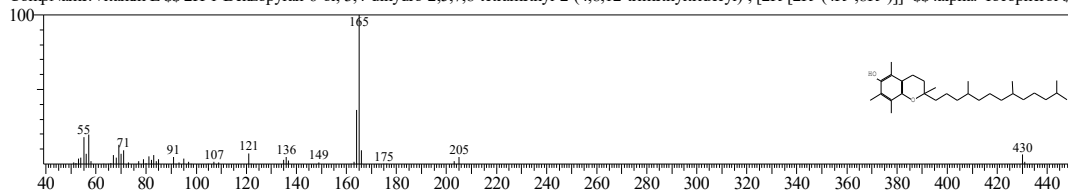

Cannot read library data

Hit#:3 Entry:30136 Library:NIST11s.lib

SE:62 Formula:C29H50O2 CAS:59-02-9 MolWeight:430 RetIndex:3149

CompName:Vitamin E \$\$ 2H-1-Benzopyran-6-ol, 3,4-dihydro-2,5,7,8-tetramethyl-2-(4,8,12-trimethyltridecyl)-, [2R-[2R\*(4R\*,8R\*)]]- \$\$ .alpha.-Tocopherol \$\$

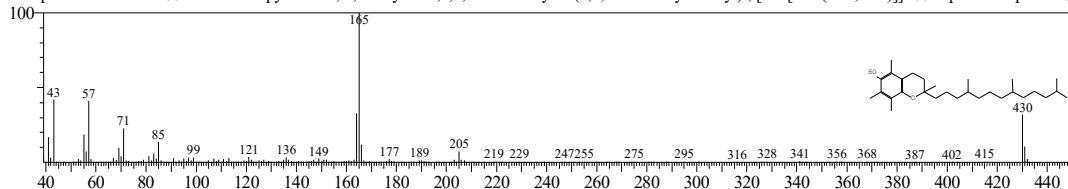

Hit#:4 Entry:192216 Library:NIST11.lib

SE:61 Formula:C29H50O2 CAS:4707-85-1 MolWeight:430 RetIndex:2721

CompName:Cholest-4-ene, 3.beta.-(methoxymethoxy)- \$\$ 3-(Methoxymethoxy)cholest-4-ene # \$\$

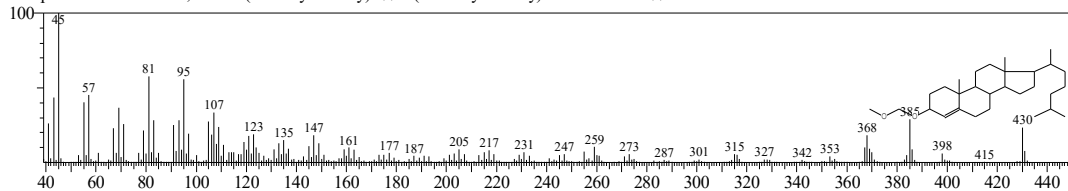

Hit#:5 Entry:192221 Library:NIST11.lib

SE:59 Formula:C29H50O2 CAS:10191-41-0 MolWeight:430 RetIndex:3149

CompName:dl-.alpha.-Tocopherol \$\$ (+/-)-.alpha.-Tocopherol \$\$ 2H-1-Benzopyran-6-ol, 3,4-dihydro-2,5,7,8-tetramethyl-2-(4,8,12-trimethyltridecyl)- \$\$ 6-Ch

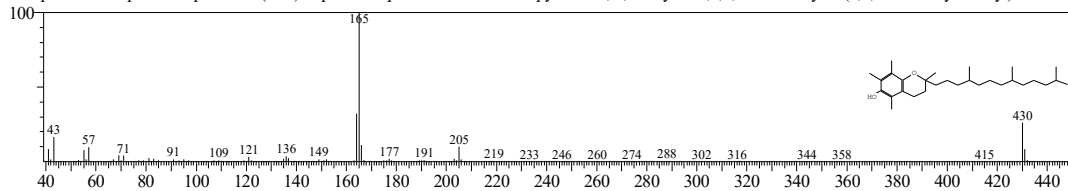

&lt;&lt; Target &gt;&gt;

Line#:20 R.Time:18.958(Scan#:1616) MassPeaks:153  
RawMode:Single 18.958(1616) BasePeak:71.05(160629)  
BG Mode:None Group 1 - Event 1

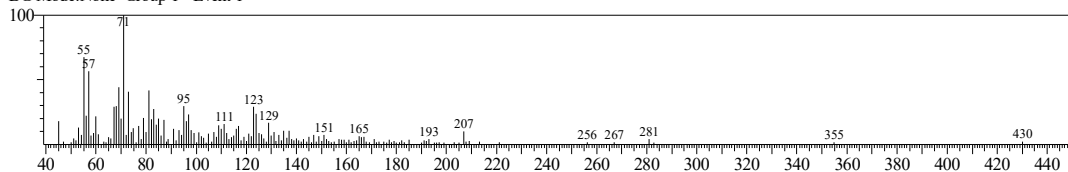

Hit#:1 Entry:25944 Library:NIST11s.lib

SI:79 Formula:C20H40O CAS:150-86-7 MolWeight:296 RetIndex:2045

CompName:Phytol \$\$ 2-Hexadecen-1-ol, 3,7,11,15-tetramethyl-, [R-[R\*,R\*-(E)]]- \$\$ trans-Phytol \$\$ 3,7,11,15-Tetramethyl-2-hexadecen-1-ol-, (2E,7R,11R)- \$

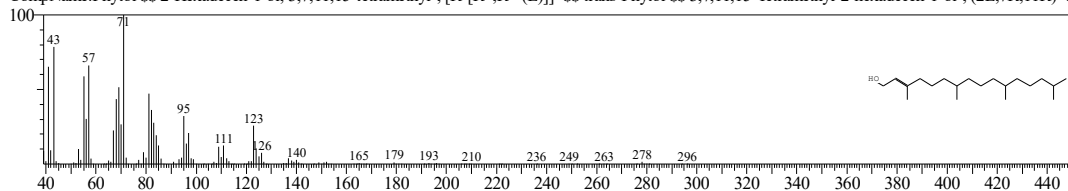

Hit#:2 Entry:135733 Library:NIST11s.lib

SI:78 Formula:C21H38O2 CAS:56687-68-4 MolWeight:322 RetIndex:2203

CompName:[1,1'-Bicyclopropyl]-2-octanoic acid, 2'-hexyl-, methyl ester

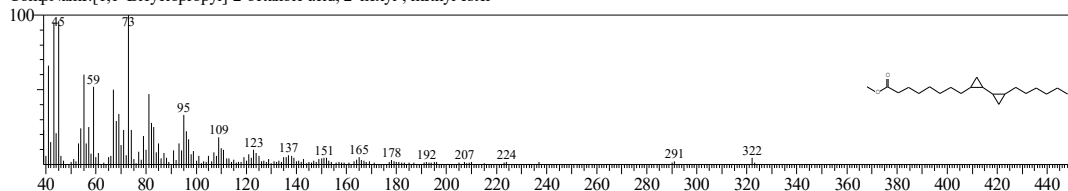

Hit#:3 Entry:25037 Library:NIST11s.lib

SI:76 Formula:C18H34O2 CAS:112-80-1 MolWeight:282 RetIndex:2175

CompName:Oleic Acid \$\$ 9-Octadecenoic acid (Z)- \$\$ .DELTA.9-cis-Oleic acid \$\$ cis-Oleic Acid \$\$ cis-9-Octadecenoic Acid \$\$ Emersol 211 \$\$ Emersol 220 V

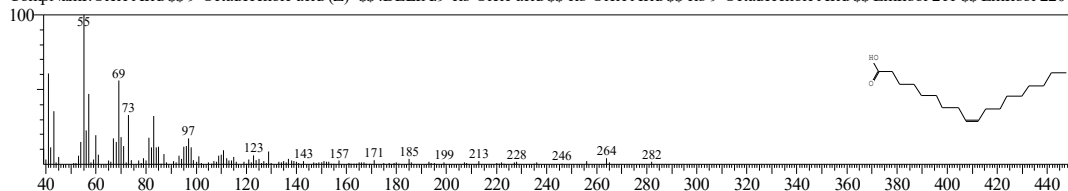

Hit#:4 Entry:115518 Library:NIST11s.lib

SI:76 Formula:C20H40O CAS:102608-53-7 MolWeight:296 RetIndex:2045

CompName:3,7,11,15-Tetramethyl-2-hexadecen-1-ol \$\$ 2-Hexadecen-1-ol, 3,7,11,15-tetramethyl \$\$

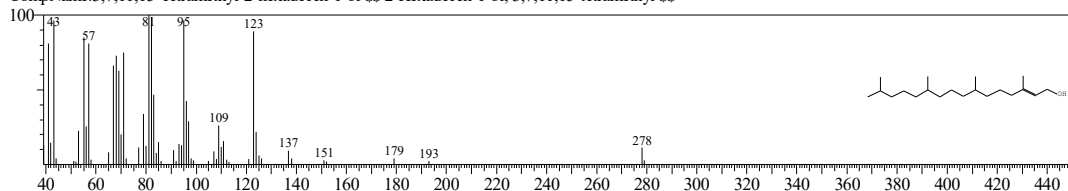

Hit#:5 Entry:102809 Library:NIST11s.lib

SI:76 Formula:C18H32O2 CAS:34450-18-5 MolWeight:280 RetIndex:2165

CompName:17-Octadecynoic acid

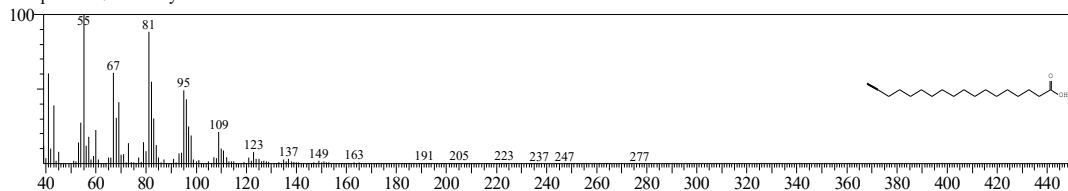

&lt;&lt; Target &gt;&gt;

Line#:21 R.Time:19.233(Scan#:1649) MassPeaks:170

RawMode:Single 19.233(1649) BasePeak:55.00(174562)

BG Mode:None Group 1 - Event 1

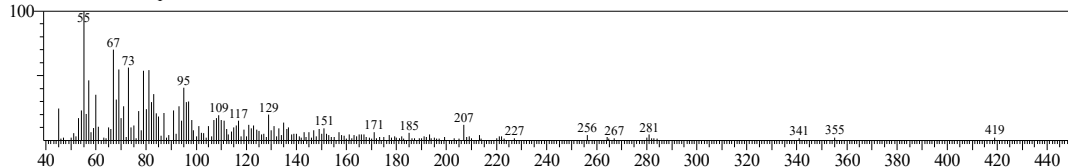

Hit#1 Entry:24902 Library:NIST11s.lib

SE:84 Formula:C18H32O2 CAS:60-33-3 MolWeight:280 RetIndex:2183

CompName:9,12-Octadecadienoic acid (Z,Z)- \$\$ cis-9,cis-12-Octadecadienoic acid \$\$ cis,cis-Linoleic acid \$\$ Grape seed oil \$\$ Linoleic acid \$\$ Li

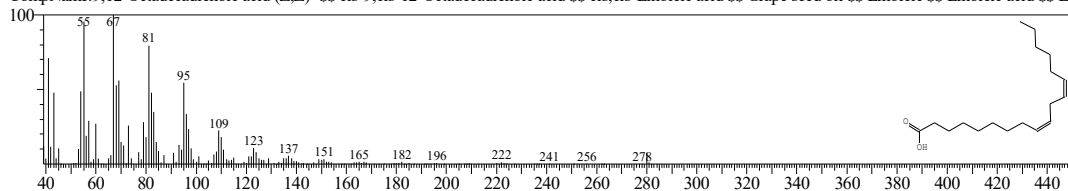

Hit#2 Entry:144979 Library:NIST11s.lib

SE:81 Formula:C22H38O2 CAS:10152-71-3 MolWeight:334 RetIndex:2266

CompName:Cyclopropanooctanoic acid, 2-[[2-[(2-ethylcyclopropyl)methyl]cyclopropyl]methyl]-, methyl ester \$\$ Methyl 8-[2-[(2-ethylcyclopropyl)methyl]c

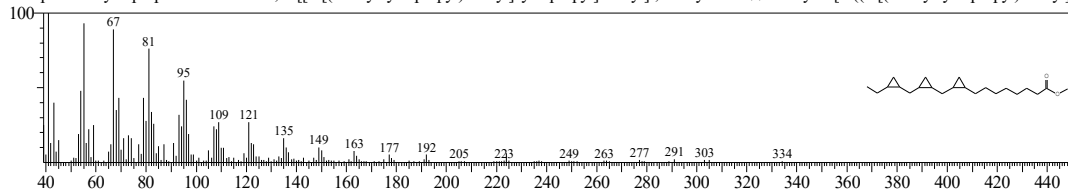

Hit#3 Entry:102809 Library:NIST11s.lib

SE:80 Formula:C18H32O2 CAS:34450-18-5 MolWeight:280 RetIndex:2165

CompName:17-Octadecynoic acid

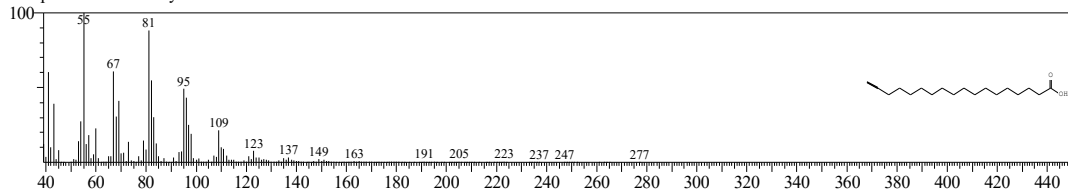

Hit#4 Entry:26018 Library:NIST11s.lib

SE:80 Formula:C18H31ClO CAS:7459-33-8 MolWeight:298 RetIndex:2139

CompName:9,12-Octadecadienoyl chloride, (Z,Z)- \$\$ Linoleoyl chloride \$\$ Lineoleoyl chloride \$\$ Linoleic acid chloride \$\$ (9E,12E)-9,12-Octadecadienoyl ch

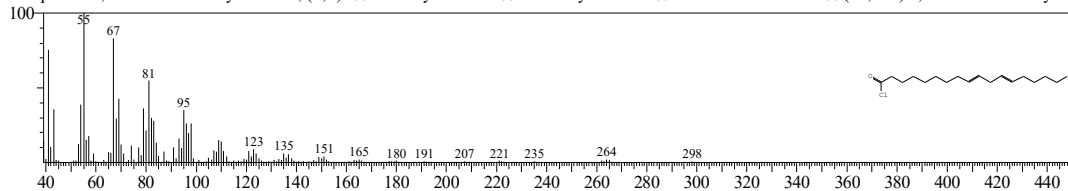

Hit#5 Entry:91948 Library:NIST11s.lib

SE:79 Formula:C18H34O CAS:0-00-0 MolWeight:266 RetIndex:2069

CompName:Z,Z-3,13-Octadecadien-1-ol \$\$ (4Z,13Z)-4,13-Octadecadien-1-ol # \$\$

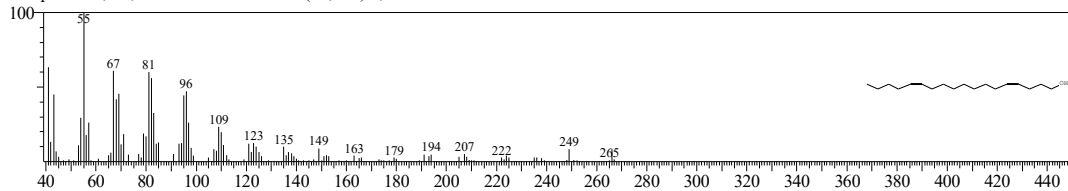

Supplement: s1 [file s1]
