# Supplementary material for: Model Optimization and In Silico Analysis of Potential Dipeptidyl Peptidase IV Antagonists from GC-MS Identified Compounds in Nauclea latifolia Leaf Extracts
Source: MDPI journal article supplement (doi:10.3390/ijms20235913), 2019-11-25

| Peak# | R.Time | I.Time | F.Time | Area      | Area%  | Height    | Height% | A/H   | Mark | Name                                         |
|-------|--------|--------|--------|-----------|--------|-----------|---------|-------|------|----------------------------------------------|
| 26    | 16.208 | 15.817 | 16.250 | 73694026  | 8.47   | 4672086   | 2.38    | 15.77 | V    | 1,2,3,5-Cyclohexanetetrol, (1.alpha.,2.beta. |
| 27    | 16.278 | 16.250 | 16.417 | 31667436  | 3.64   | 5612423   | 2.86    | 5.64  | V    | 1,2,3,5-Cyclohexanetetrol, (1.alpha.,2.beta. |
| 28    | 16.592 | 16.508 | 16.642 | 12050977  | 1.38   | 2138344   | 1.09    | 5.64  | V    | Tridecanoic acid                             |
| 29    | 16.770 | 16.642 | 16.800 | 18151447  | 2.09   | 3289426   | 1.68    | 5.52  | V    | Dodecanoic acid                              |
| 30    | 16.908 | 16.800 | 16.942 | 19330254  | 2.22   | 3572980   | 1.82    | 5.41  | V    | [1,1'-Bicyclopropyl]-2-octanoic acid, 2'-hex |
| 31    | 16.984 | 16.942 | 17.042 | 21504642  | 2.47   | 5986904   | 3.06    | 3.59  | V    | 2-O-p-Methylphenyl-1-thio-.beta.-d-glucosi   |
| 32    | 17.099 | 17.042 | 17.183 | 26710369  | 3.07   | 4339717   | 2.21    | 6.15  | V    | [1,1'-Bicyclopropyl]-2-octanoic acid, 2'-hex |
| 33    | 17.333 | 17.308 | 17.442 | 23316124  | 2.68   | 3506977   | 1.79    | 6.65  | V    | 3-O-Methyl-d-glucose                         |
| 34    | 17.473 | 17.442 | 17.650 | 8891593   | 1.02   | 2056313   | 1.05    | 4.32  | V    | [1,1'-Bicyclopropyl]-2-octanoic acid, 2'-hex |
| 35    | 18.126 | 17.942 | 18.158 | 94546881  | 10.86  | 18962907  | 9.68    | 4.99  | V    | n-Hexadecanoic acid                          |
| 36    | 18.195 | 18.158 | 18.250 | 63743335  | 7.32   | 25631265  | 13.08   | 2.49  | V    | Hexadecanoic acid, ethyl ester               |
| 37    | 18.291 | 18.250 | 18.350 | 16226477  | 1.86   | 3504361   | 1.79    | 4.63  | V    | .gamma.-Sitosterol                           |
| 38    | 18.375 | 18.350 | 18.433 | 10312008  | 1.18   | 2771191   | 1.41    | 3.72  | V    | .gamma.-Sitosterol                           |
| 39    | 18.814 | 18.750 | 18.917 | 9045664   | 1.04   | 2313469   | 1.18    | 3.91  | V    | 9,9-Dimethoxybicyclo[3.3.1]nona-2,4-dione    |
| 40    | 18.983 | 18.917 | 19.117 | 63043592  | 7.24   | 29892676  | 15.25   | 2.11  | V    | Phytol                                       |
| 41    | 19.319 | 19.117 | 19.408 | 156657817 | 18.00  | 26630343  | 13.59   | 5.88  | V    | Ethyl Oleate                                 |
| 42    | 19.441 | 19.408 | 19.700 | 47999252  | 5.51   | 14393576  | 7.35    | 3.33  | V    | Octadecanoic acid, ethyl ester               |
| 43    | 19.824 | 19.700 | 19.950 | 26562080  | 3.05   | 2736147   | 1.40    | 9.71  | V    | Androstan-17-one, 16,16-dimethyl-, (5.alpha  |
| 44    | 20.088 | 19.950 | 20.208 | 23442194  | 2.69   | 2783062   | 1.42    | 8.42  | V    | 1-Naphthalenol, decahydro-1,4a-dimethyl-7    |
| 45    | 20.390 | 20.208 | 20.583 | 22336031  | 2.57   | 2271101   | 1.16    | 9.83  | V    | Androstan-17-one, 16,16-dimethyl-, (5.alpha  |
| 46    | 20.652 | 20.583 | 20.675 | 5393308   | 0.62   | 2973493   | 1.52    | 1.81  | V    | Hexadecanoic acid, ethyl ester               |
| 47    | 20.721 | 20.675 | 20.767 | 2487778   | 0.29   | 900702    | 0.46    | 2.76  | V    | 17-Octadecynoic acid                         |
|       |        |        |        | 870348710 | 100.00 | 195958256 | 100.00  |       |      |                                              |

## Library

&lt;&lt; Target &gt;&gt;

Line#:1 R.Time:7.700(Scan#:265) MassPeaks:56

RawMode:Single 7.700(265) BasePeak:55.00(283402)

BG Mode:None Group 1 - Event 1

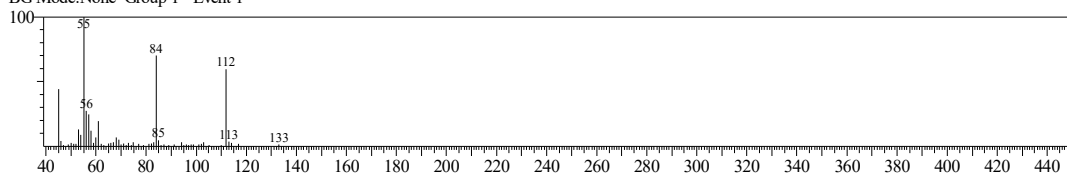

Hit#:1 Entry:2882 Library:NIST11s.lib

SI:79 Formula:C6H8O2 CAS:504-02-9 MolWeight:112 RetIndex:1062

CompName:1,3-Cyclohexanedione \$\$ Dihydroresorcinol \$\$ Cyclohexane-1,3-dione \$\$ Hydroresorcinol \$\$ Resorcinol, dihydro- \$\$ 1,3-Benzenediol, dihydro- \$

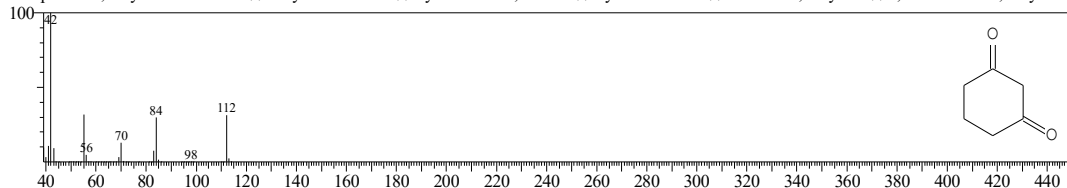

Hit#:2 Entry:2923 Library:NIST11s.lib

SI:78 Formula:C6H12N2 CAS:280-57-9 MolWeight:112 RetIndex:965

CompName:Triethylenediamine \$\$ 1,4-Diazabicyclo[2.2.2]octane \$\$ Bicyclo[2.2.2]-1,4-diazaoctane \$\$ D 33LV \$\$ Dabco \$\$ Dabco 33LV \$\$ N,N'-endo-Ethyl

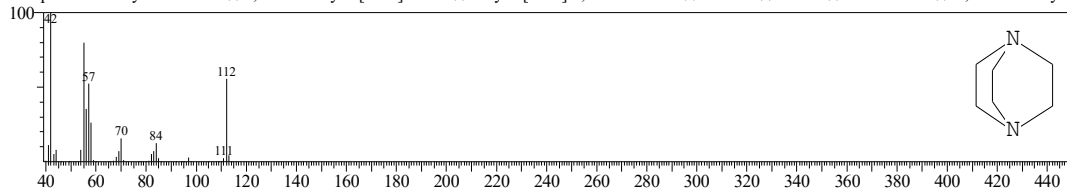

Hit#:3 Entry:2053 Library:NIST11s.lib

SI:78 Formula:C5H10O2 CAS:5057-99-8 MolWeight:102 RetIndex:976

CompName:1,2-Cyclopentanediol, trans- \$\$ trans-1,2-Cyclopentanediol \$\$ 1,2-Cyclopentanediol # \$\$

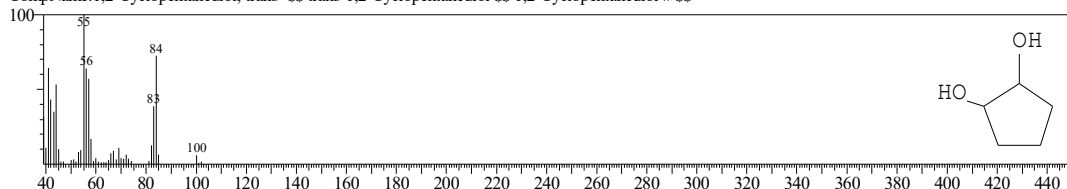

&lt;&lt; Target &gt;&gt;

Line#:1 R.Time:7.700(Scan#:265) MassPeaks:56  
RawMode:Single 7.700(265) BasePeak:55.00(283402)  
BG Mode:None Group 1 - Event 1

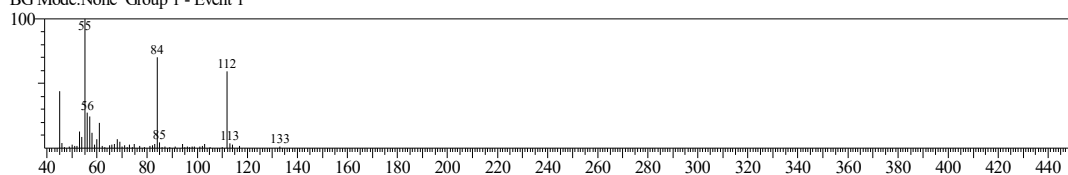

Hit#4 Entry:3425 Library:NIST11.lib

SE:77 Formula:C<sub>6</sub>H<sub>8</sub>O<sub>2</sub> CAS:3740-59-8 MolWeight:112 RetIndex:1017

CompName:3,4-Dihydro-6-methyl-2H-pyran-2-one \$\$ 6-Methyl-3,4-dihydro-2H-pyran-2-one # \$\$

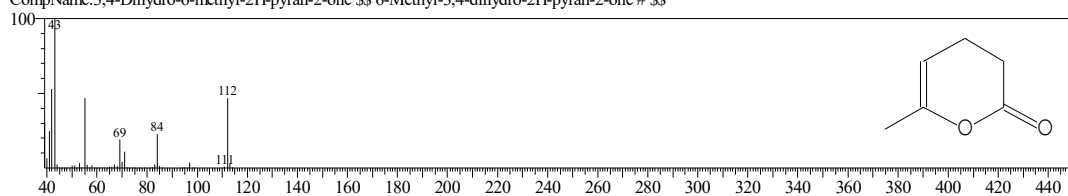

Hit#5 Entry:7543 Library:NIST11.lib

SE:77 Formula:C<sub>7</sub>H<sub>14</sub>N<sub>2</sub>O CAS:20917-49-1 MolWeight:142 RetIndex:1407

CompName:Azocine, octahydro-1-nitroso- \$\$ N-Nitrosoazacyclooctane \$\$ N-Nitrosoheptamethyleneimine \$\$ Nhmi \$\$ Nitrosoheptamethyleneimine \$\$ Nitroso-

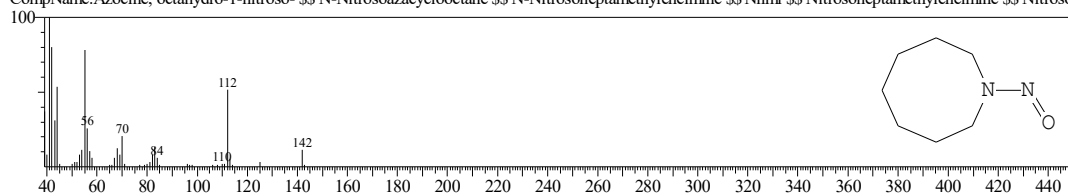

## &lt;&lt; Target &gt;&gt;

Line#:2 R.Time:5.700(Scan#:25) MassPeaks:39  
RawMode:Single 5.700(25) BasePeak:95.95(179925)  
BG Mode:None Group 1 - Event 1

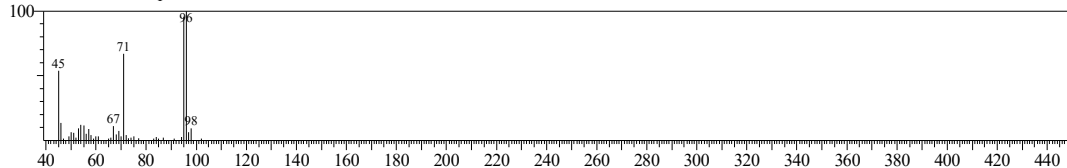

Hit#1 Entry:61855 Library:NIST11.lib  
SI:78 Formula:C11H14O5 CAS:6289-73-2 MolWeight:226 RetIndex:1509  
CompName:2-Furanmethanediol, dipropionate \$\$ 2-Furyl(propionyloxy)methyl propionate # \$\$

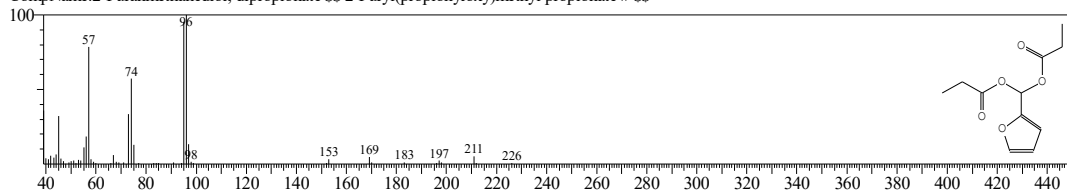

Hit#2 Entry:1387 Library:NIST11.lib  
SI:77 Formula:C5H8N2 CAS:2302-39-8 MolWeight:96 RetIndex:927  
CompName:1H-Imidazole, 4,5-dimethyl- \$\$ Imidazole, 4,5-dimethyl- \$\$ 4,5-Dimethyl-1H-imidazole # \$\$

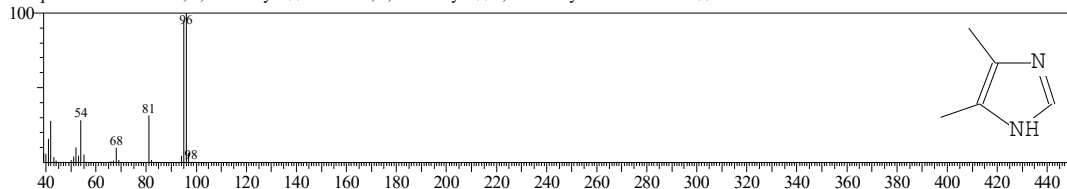

Hit#3 Entry:1394 Library:NIST11.lib  
SI:77 Formula:C5H8N2 CAS:694-31-5 MolWeight:96 RetIndex:804  
CompName:1H-Pyrazole, 1,5-dimethyl- \$\$ Pyrazole, 1,5-dimethyl- \$\$ 1,5-Dimethylpyrazole \$\$ 1,5-Dimethyl-1H-pyrazole \$\$

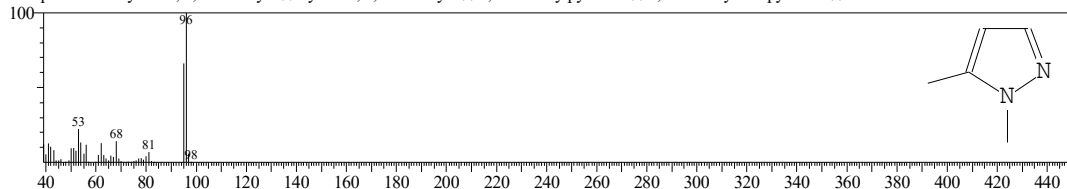

Hit#4 Entry:17814 Library:NIST11.lib  
SI:76 Formula:C6H9N3S CAS:1124-15-8 MolWeight:155 RetIndex:1523  
CompName:1H-Pyrazole-1-carbothioamide, 3,5-dimethyl- \$\$ 3,5-Dimethyl-1H-pyrazole-1-carbothioamide # \$\$

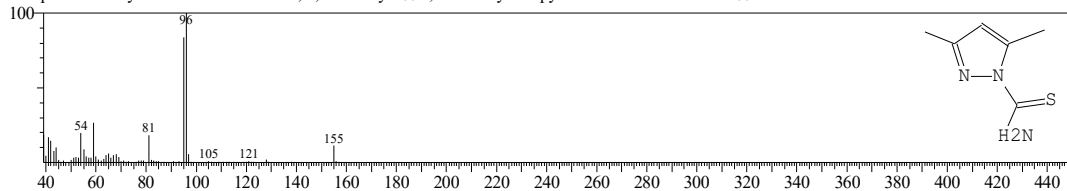

Hit#5 Entry:51279 Library:NIST11.lib  
SI:75 Formula:C10H13NO4 CAS:22882-18-4 MolWeight:211 RetIndex:1926  
CompName:2(1H)-Pyridone, 1-(2-deoxy-.alpha.-D-erythro-pentofuranosyl)-

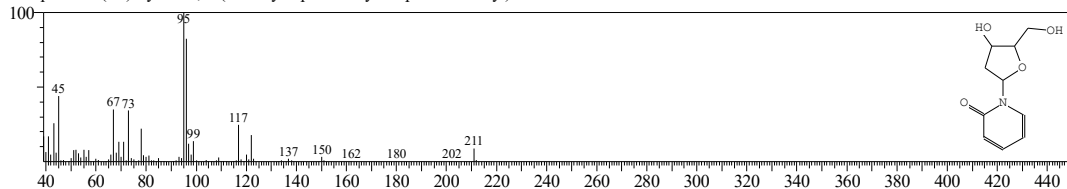

## &lt;&lt; Target &gt;&gt;

Line#:3 R.Time:5.900(Scan#:49) MassPeaks:38  
RawMode:Single 5.900(49) BasePeak:45.00(81993)  
BG Mode:None Group 1 - Event 1

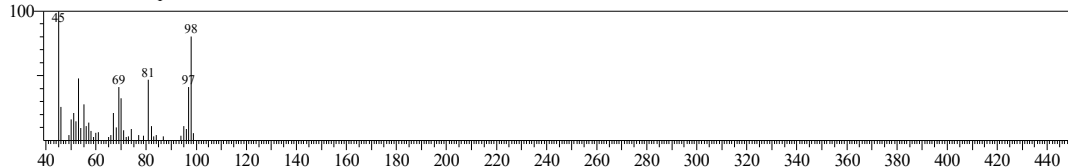

Hit#1 Entry:1582 Library:NIST11s.lib

SE:82 Formula:C5H6O2 CAS:98-00-0 MolWeight:98 RetIndex:885

CompName:2-Furanmethanol \$\$ Furfuryl alcohol \$\$ .alpha.-Furfuryl alcohol \$\$ .alpha.-Furycarbinol \$\$ Furfuralcohol \$\$ Furyl alcohol \$\$ Furycarbinol \$\$ 2-(

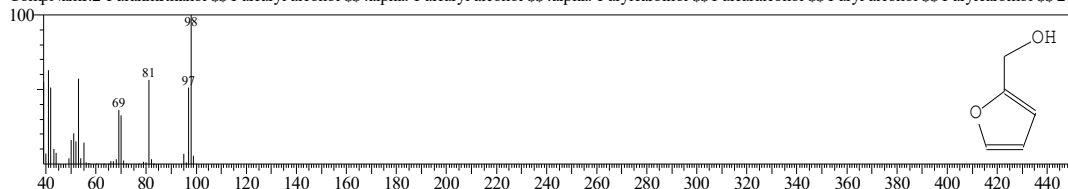

Hit#2 Entry:1509 Library:NIST11s.lib

SE:81 Formula:C5H6O2 CAS:98-00-0 MolWeight:98 RetIndex:885

CompName:2-Furanmethanol \$\$ Furfuryl alcohol \$\$ .alpha.-Furfuryl alcohol \$\$ .alpha.-Furycarbinol \$\$ Furfuralcohol \$\$ Furyl alcohol \$\$ Furycarbinol \$\$ 2-(

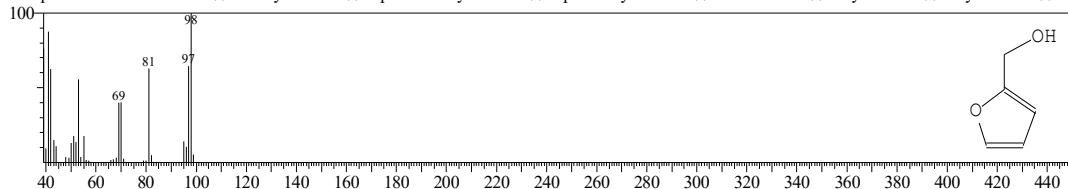

Hit#3 Entry:1511 Library:NIST11s.lib

SE:81 Formula:C5H6O2 CAS:98-00-0 MolWeight:98 RetIndex:885

CompName:2-Furanmethanol \$\$ Furfuryl alcohol \$\$ .alpha.-Furfuryl alcohol \$\$ .alpha.-Furycarbinol \$\$ Furfuralcohol \$\$ Furyl alcohol \$\$ Furycarbinol \$\$ 2-(

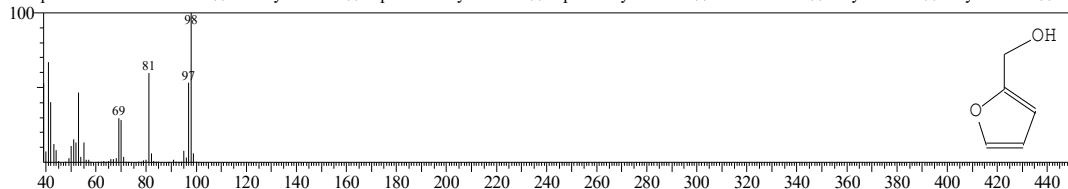

Hit#4 Entry:1512 Library:NIST11s.lib

SE:80 Formula:C5H6O2 CAS:98-00-0 MolWeight:98 RetIndex:885

CompName:2-Furanmethanol \$\$ Furfuryl alcohol \$\$ .alpha.-Furfuryl alcohol \$\$ .alpha.-Furycarbinol \$\$ Furfuralcohol \$\$ Furyl alcohol \$\$ Furycarbinol \$\$ 2-(

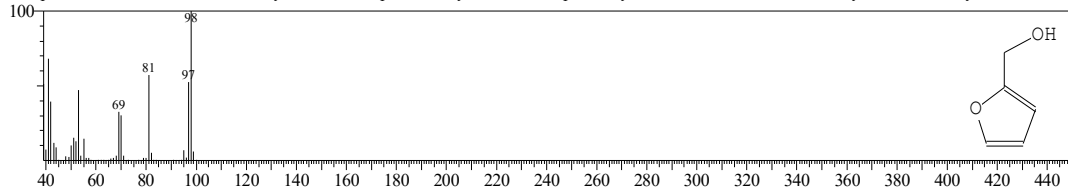

Hit#5 Entry:1552 Library:NIST11s.lib

SE:78 Formula:C4H6N2O CAS:10552-94-0 MolWeight:98 RetIndex:1029

CompName:1H-Pyrrole, 2,5-dihydro-1-nitroso- \$\$ 3-Pyrroline, 1-nitroso- \$\$ Nitroso-3-pyrroline \$\$ 3-Pyrroline, N-nitroso- \$\$ 2,5-Dihydro-1-nitroso-1H-pyrrol

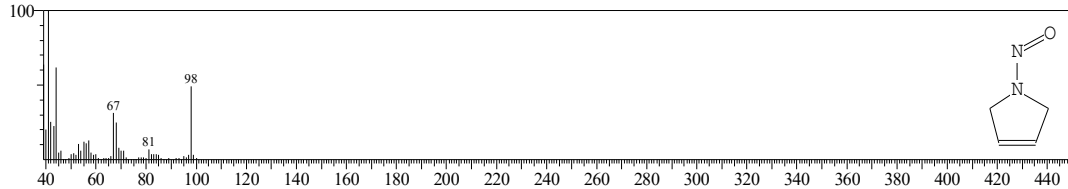

&lt;&lt; Target &gt;&gt;

Line#:4 R.Time:7.450(Scan#:235) MassPeaks:48

RawMode:Single 7.450(235) BasePeak:45.00(131030)

BG Mode:None Group 1 - Event 1

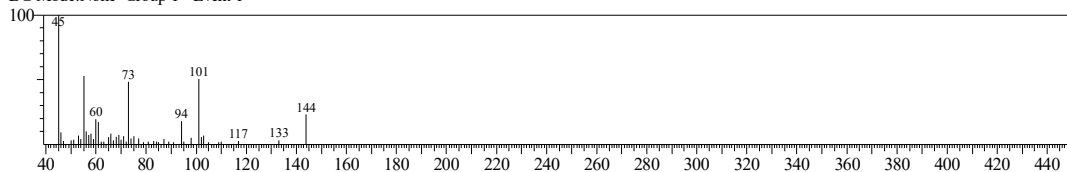

Hit#1 Entry:8130 Library:NIST11s.lib

SI:75 Formula:C5H6O5 CAS:328-50-7 MolWeight:146 RetIndex:1367

CompName:2-Oxopentanedioic acid \$\$ 2-Ketoglutaric acid \$\$ 2-Oxoglutaric acid \$\$ .alpha.-Ketoglutaric acid \$\$ Pentanedioic acid, 2-oxo- \$\$ Glutaric acid, 2-

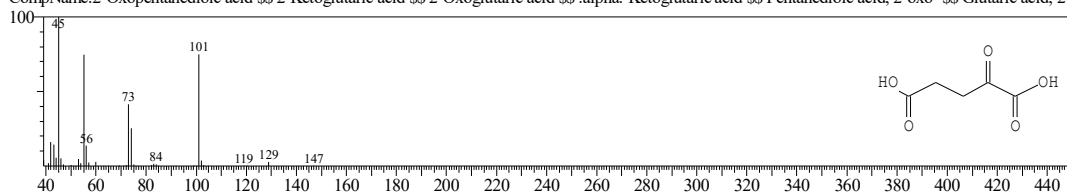

Hit#2 Entry:19227 Library:NIST11s.lib

SI:73 Formula:C8H14OS CAS:104223-43-0 MolWeight:158 RetIndex:1271

CompName:5-Butyldihydro-2(3H)thiophenone

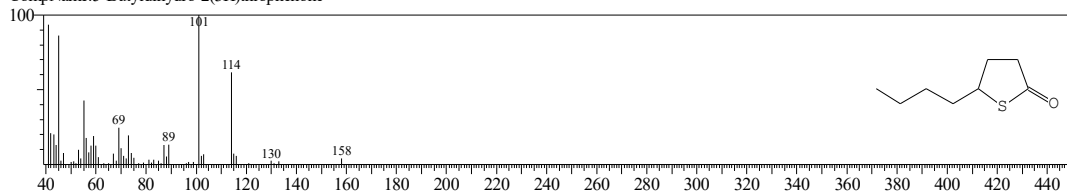

Hit#3 Entry:18197 Library:NIST11s.lib

SI:72 Formula:C7H8O4 CAS:189459-95-8 MolWeight:156 RetIndex:1239

CompName:Butanedioic acid, monopropargyl ester \$\$ 4-Oxo-4-(2-propynyloxy)butanoic acid # \$\$

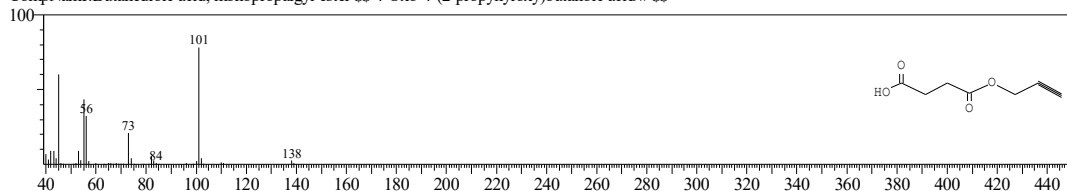

Hit#4 Entry:5485 Library:NIST11s.lib

SI:72 Formula:C6H15BO2 CAS:53907-92-9 MolWeight:130 RetIndex:0

CompName:boronic acid, ethyl-, diethyl ester \$\$ Diethyl ethylboronate # \$\$

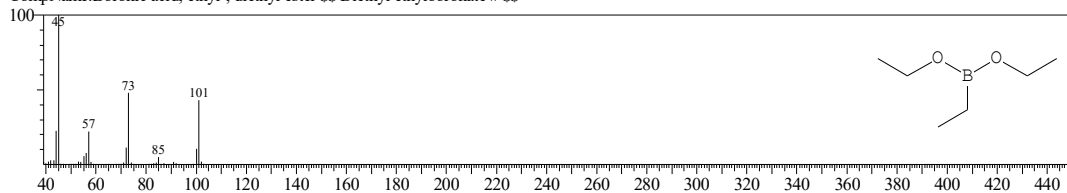

Hit#5 Entry:13472 Library:NIST11s.lib

SI:72 Formula:C5H6O5 CAS:328-50-7 MolWeight:146 RetIndex:1367

CompName:2-Oxopentanedioic acid \$\$ 2-Ketoglutaric acid \$\$ 2-Oxoglutaric acid \$\$ .alpha.-Ketoglutaric acid \$\$ Pentanedioic acid, 2-oxo- \$\$ Glutaric acid, 2-

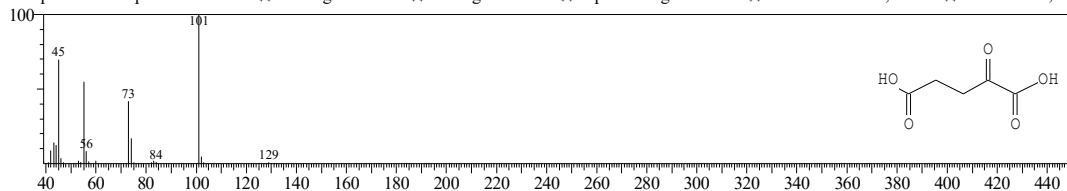

&lt;&lt; Target &gt;&gt;

Line#:5 R.Time:7.708(Scan#:266) MassPeaks:56  
RawMode:Single 7.708(266) BasePeak:55.00(292359)  
BG Mode:None Group 1 - Event 1

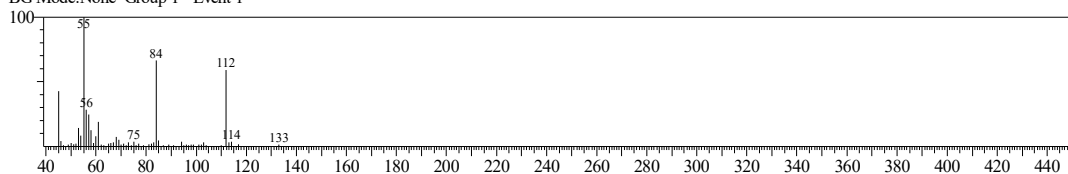

Hit#1 Entry:2882 Library:NIST11s.lib

SI:78 Formula:C6H8O2 CAS:504-02-9 MolWeight:112 RetIndex:1062

CompName:1,3-Cyclohexanedione \$\$ Dihydroresorcinol \$\$ Cyclohexane-1,3-dione \$\$ Hydroresorcinol \$\$ Resorcinol, dihydro- \$\$ 1,3-Benzenediol, dihydro- \$

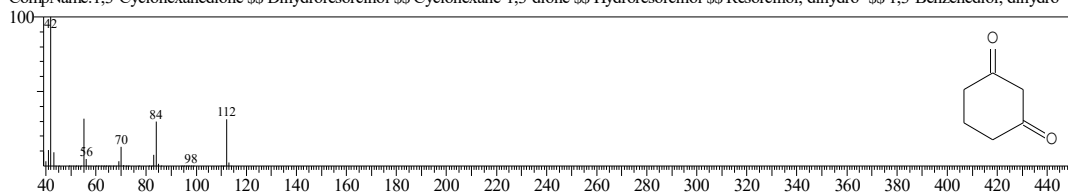

Hit#2 Entry:2923 Library:NIST11s.lib

SI:78 Formula:C6H12N2 CAS:280-57-9 MolWeight:112 RetIndex:965

CompName:Triethylenediamine \$\$ 1,4-Diazabicyclo[2.2.2]octane \$\$ Bicyclo[2.2.2]-1,4-diazaoctane \$\$ D 33LV \$\$ Dabco \$\$ Dabco 33LV \$\$ N,N'-endo-Ethylr

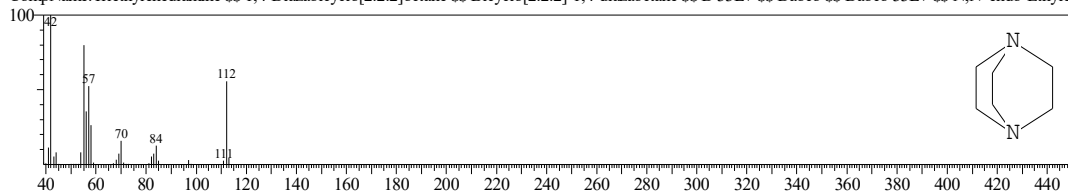

Hit#3 Entry:2053 Library:NIST11s.lib

SI:78 Formula:C5H10O2 CAS:5057-99-8 MolWeight:102 RetIndex:976

CompName:1,2-Cyclopentanediol, trans- \$\$ trans-1,2-Cyclopentanediol \$\$ 1,2-Cyclopentanediol # \$\$

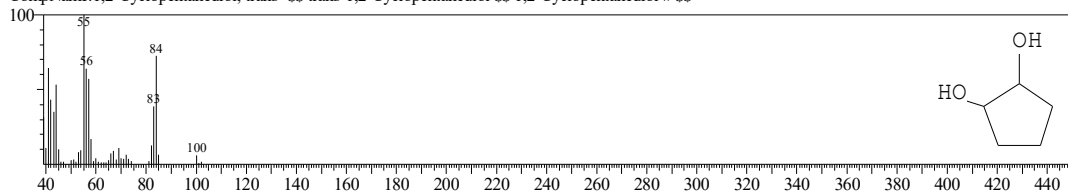

Hit#4 Entry:2955 Library:NIST11s.lib

SI:78 Formula:C7H12O CAS:589-92-4 MolWeight:112 RetIndex:952

CompName:Cyclohexanone, 4-methyl- \$\$ 4-Methylcyclohexanone \$\$ p-Methyl cyclohexanone \$\$ 4-Methyl-1-cyclohexanone \$\$ Methyl-4 cyclohexanone-1 \$\$

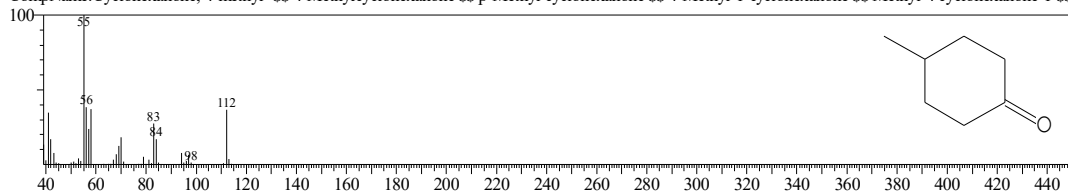

Hit#5 Entry:3425 Library:NIST11s.lib

SI:77 Formula:C6H8O2 CAS:3740-59-8 MolWeight:112 RetIndex:1017

CompName:3,4-Dihydro-6-methyl-2H-pyran-2-one \$\$ 6-Methyl-3,4-dihydro-2H-pyran-2-one # \$\$

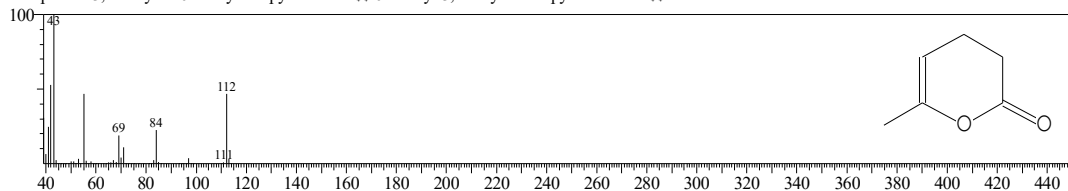

&lt;&lt; Target &gt;&gt;

Line#:6 R.Time:8.317(Scan#:339) MassPeaks:65  
RawMode:Single 8.317(339) BasePeak:61.00(206081)  
BG Mode:None Group 1 - Event 1

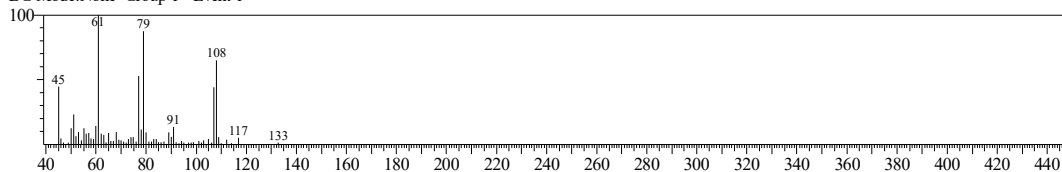

Hit#1 Entry:94554 Library:NIST11.lib  
SI:66 Formula:C<sub>13</sub>H<sub>18</sub>O<sub>6</sub> CAS:0-00-0 MolWeight:270 RetIndex:2387  
CompName:4-Benzylxy-6-hydroxymethyl-tetrahydropyran-2,3,5-triol \$\$ 3-O-Benzylhexopyranose # \$\$

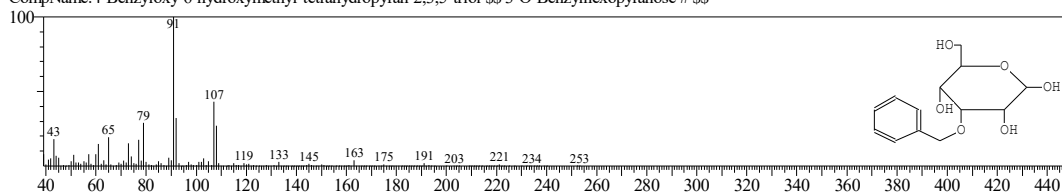

Hit#2 Entry:60478 Library:NIST11.lib  
SI:66 Formula:C<sub>12</sub>H<sub>16</sub>O<sub>2</sub>S CAS:62170-10-9 MolWeight:224 RetIndex:1753  
CompName:S-Butyl phenoxthioacetate \$\$ S-Butyl phenoxyethanethioate # \$\$

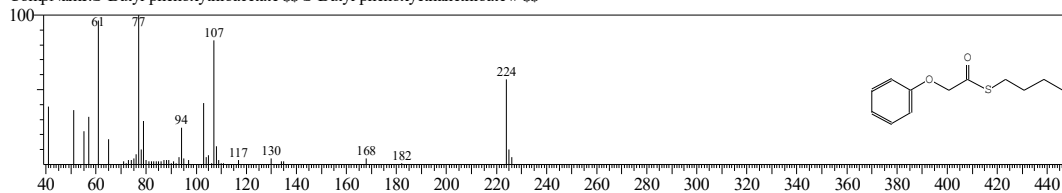

Cannot read library data

Hit#4 Entry:45076 Library:NIST11.lib  
SI:65 Formula:C<sub>11</sub>H<sub>26</sub>O<sub>2</sub>Si CAS:167567-66-0 MolWeight:202 RetIndex:1075  
CompName:1-Di(t-butyl)silyloxypropane \$\$ Di(tert-butyl)(propoxy)silane # \$\$

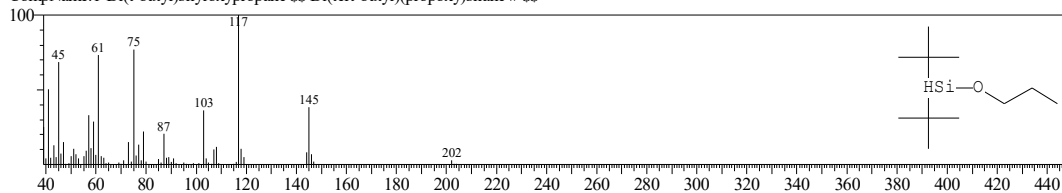

Hit#5 Entry:2749 Library:NIST11.lib  
SI:65 Formula:C<sub>3</sub>H<sub>8</sub>S<sub>2</sub> CAS:1618-26-4 MolWeight:108 RetIndex:821  
CompName:2,4-Dithiapentane \$\$ CH<sub>3</sub>SCH<sub>2</sub>SCH<sub>3</sub> \$\$ Bis(methylthio)methane \$\$ Formaldehyde dimethyl mercaptal \$\$ Methane, bis(methylthio)- \$\$ Bis(methy

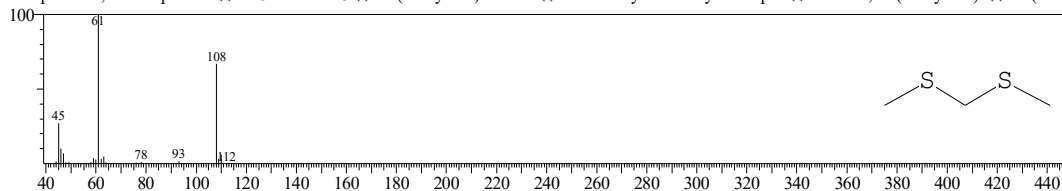

&lt;&lt; Target &gt;&gt;

Line#:7 R.Time:9.083(Scan#:431) MassPeaks:56  
RawMode:Single 9.083(431) BasePeak:126.00(183738)  
BG Mode:None Group 1 - Event 1

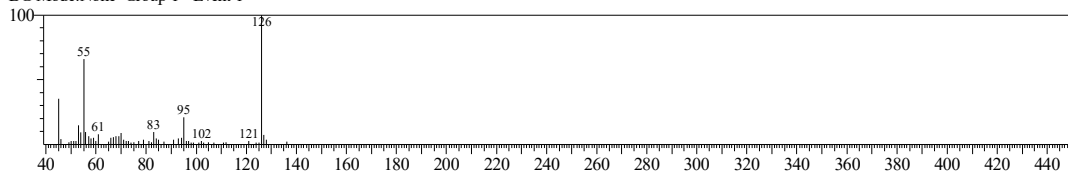

Hit#1 Entry:10247 Library:NIST11s.lib

SE:81 Formula:C<sub>8</sub>H<sub>16</sub>N<sub>2</sub>O CAS:20917-50-4 MolWeight:156 RetIndex:1527

CompName:1H-Azonine, octahydro-1-nitroso- \$\$ N-Nitrosoazacyclononane \$\$ N-Nitrosooctamethyleneimine \$\$ Octahydro-1-nitroso-1H-azonine \$\$ 1-Nitroso-

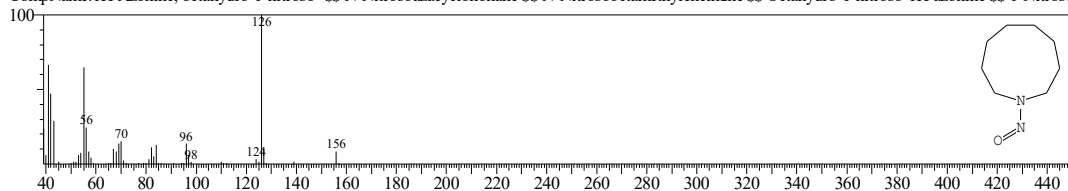

Hit#2 Entry:18369 Library:NIST11s.lib

SE:81 Formula:C<sub>8</sub>H<sub>16</sub>N<sub>2</sub>O CAS:20917-50-4 MolWeight:156 RetIndex:1527

CompName:1H-Azonine, octahydro-1-nitroso- \$\$ N-Nitrosoazacyclononane \$\$ N-Nitrosooctamethyleneimine \$\$ Octahydro-1-nitroso-1H-azonine \$\$ 1-Nitroso-

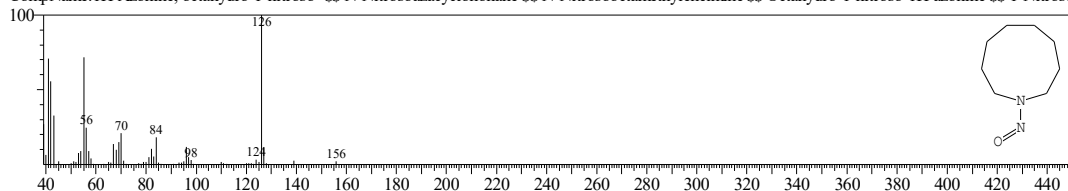

Hit#3 Entry:24025 Library:NIST11s.lib

SE:79 Formula:C<sub>11</sub>H<sub>21</sub>N CAS:108144-20-3 MolWeight:167 RetIndex:1217

CompName:Cyclohexanamine, N-3-butenyl-N-methyl- \$\$ N-(3-Butenyl)-N-methylcyclohexanamine # \$\$

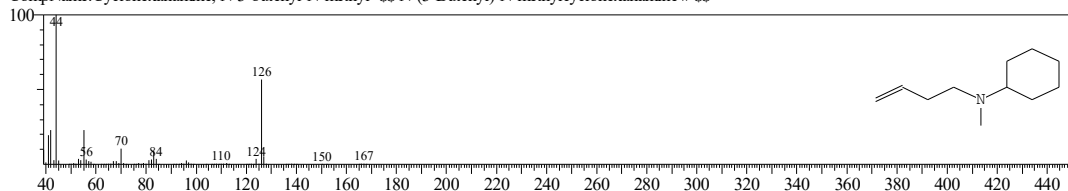

Hit#4 Entry:26260 Library:NIST11s.lib

SE:78 Formula:C<sub>7</sub>H<sub>9</sub>NO<sub>4</sub> CAS:0-00-0 MolWeight:171 RetIndex:1401

CompName:5-Isoxazolepropanoic acid, 3-methoxy-

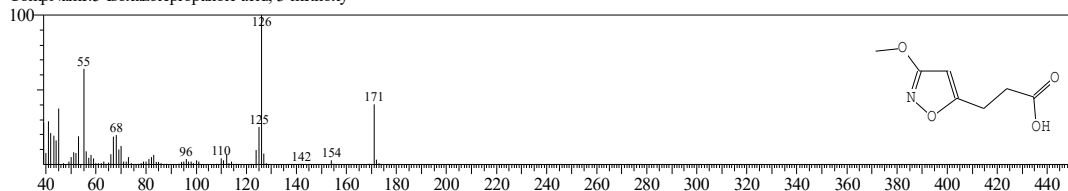

Hit#5 Entry:4792 Library:NIST11s.lib

SE:76 Formula:C<sub>7</sub>H<sub>10</sub>O<sub>2</sub> CAS:21835-01-8 MolWeight:126 RetIndex:1072

CompName:2-Cyclopenten-1-one, 3-ethyl-2-hydroxy- \$\$ 3-Ethyl-2-hydroxy-2-cyclopenten-1-one \$\$ 2-Cyclopenten-1-one, 2-hydroxy-3-ethyl \$\$ 2-Hydroxy-3-e

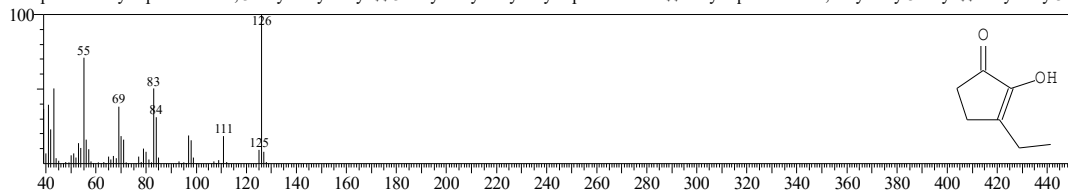



&lt;&lt; Target &gt;&gt;

Line#:8 R.Time:10.067(Scan#:549) MassPeaks:67  
RawMode:Single 10.067(549) BasePeak:144.00(250134)  
BG Mode:None Group 1 - Event 1

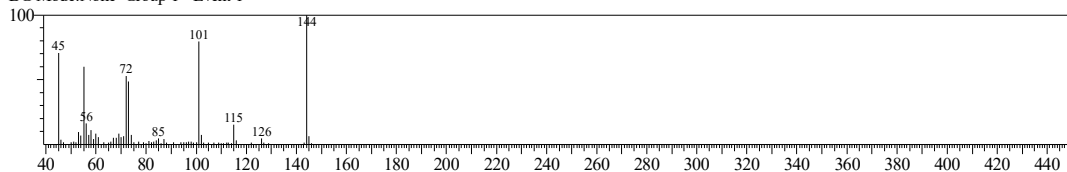

Hit#1 Entry:12699 Library:NIST11.lib

SE:89 Formula:C6H8O4 CAS:28564-83-2 MolWeight:144 RetIndex:1269

CompName:4H-Pyran-4-one, 2,3-dihydro-3,5-dihydroxy-6-methyl- \$\$ 3,5-Dihydroxy-6-methyl-2,3-dihydro-4H-pyran-4-one \$\$ 2,3-dihydro-3,5-dihydroxy-6-methyl-4H-pyran-4-one

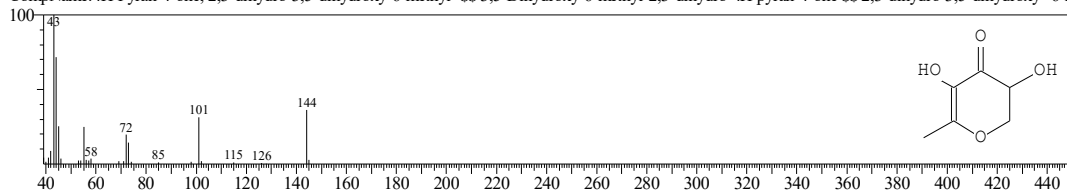

Hit#2 Entry:7819 Library:NIST11s.lib

SE:86 Formula:C6H8O4 CAS:28564-83-2 MolWeight:144 RetIndex:1269

CompName:4H-Pyran-4-one, 2,3-dihydro-3,5-dihydroxy-6-methyl- \$\$ 3,5-Dihydroxy-6-methyl-2,3-dihydro-4H-pyran-4-one \$\$ 2,3-dihydro-3,5-dihydroxy-6-methyl-4H-pyran-4-one

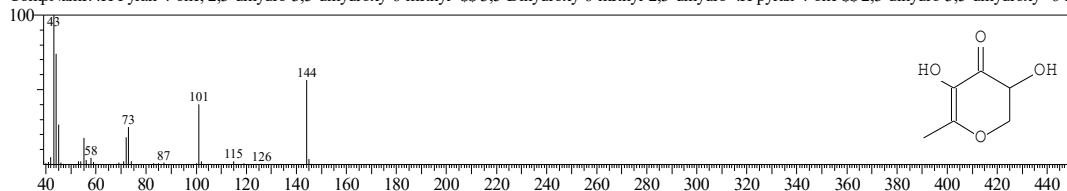

Hit#3 Entry:45473 Library:NIST11.lib

SE:77 Formula:C9H17NO4 CAS:76683-94-8 MolWeight:203 RetIndex:1352

CompName:N-(1-Methoxycarbonyl-1-methylethyl)-4-methyl-2-aza-1,3-dioxane \$\$ Methyl 2-methyl-2-(4-methyl-1,3,2-dioxazinan-2-yl)propanoate # \$\$

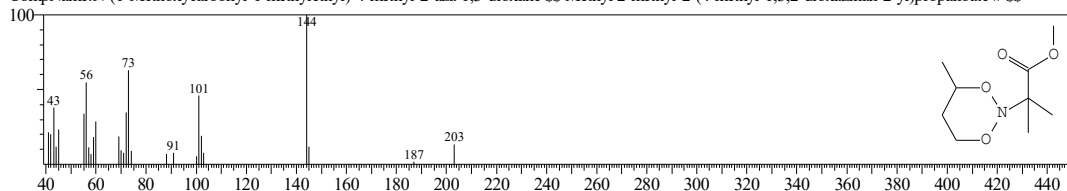

Hit#4 Entry:4533 Library:NIST11.lib

SE:76 Formula:C6H12O2 CAS:3299-32-9 MolWeight:116 RetIndex:761

CompName:1,3-Dioxolane, 2,4,5-trimethyl- \$\$ 2,4,5-Trimethyl-1,3-dioxolane # \$\$

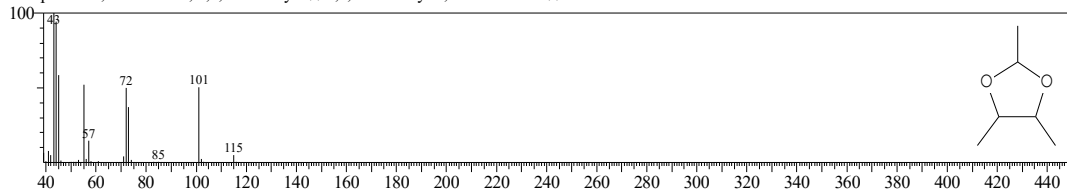

Hit#5 Entry:13038 Library:NIST11.lib

SE:75 Formula:C8H16S CAS:17912-23-1 MolWeight:144 RetIndex:1120

CompName:2-n-Propylthiane \$\$ 2-Propyltetrahydro-2H-thiopyran \$\$ 2-Propyl-thiacyclohexane \$\$ Thiane, 2-propyl \$\$

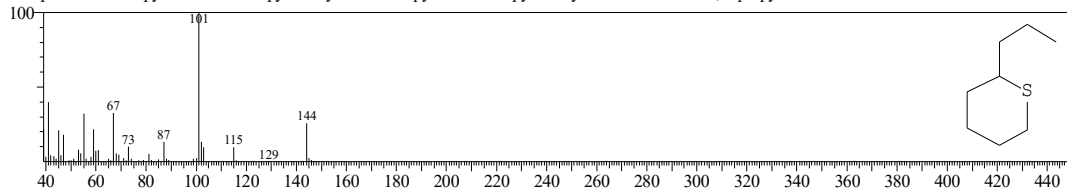

&lt;&lt; Target &gt;&gt;

Line#:9 R.Time:10.467(Scan#:597) MassPeaks:64  
RawMode:Single 10.467(597) BasePeak:105.00(88407)  
BG Mode:None Group 1 - Event 1

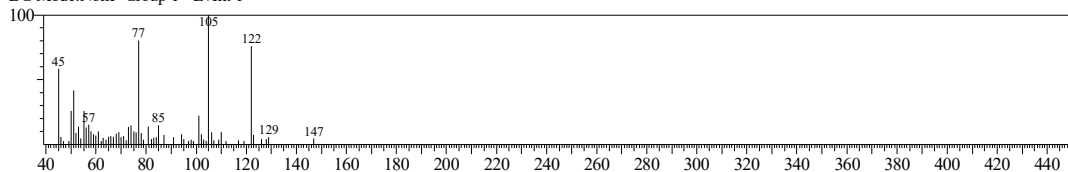

Hit#1 Entry:4279 Library:NIST11s.lib

SI:75 Formula:C7H6O2 CAS:65-85-0 MolWeight:122 RetIndex:1150

CompName:Benzoic acid \$\$ Benzenecarboxylic acid \$\$ Benzeneformic acid \$\$ Benzenemethanoic acid \$\$ Benzoesaure GK \$\$ Benzoesaure GV \$\$ Carboxyb

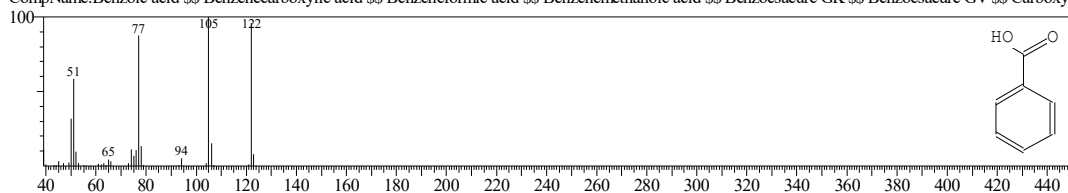

Hit#2 Entry:174968 Library:NIST11s.lib

SI:75 Formula:C20H20N2O6 CAS:0-00-0 MolWeight:384 RetIndex:3297

CompName:Hexanediamide, N,N'-di-benzoyloxy-

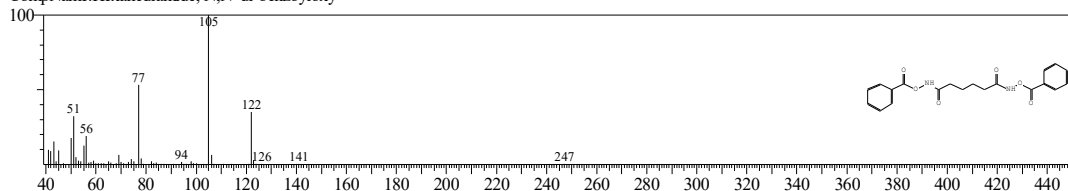

Hit#3 Entry:4280 Library:NIST11s.lib

SI:74 Formula:C7H6O2 CAS:65-85-0 MolWeight:122 RetIndex:1150

CompName:Benzoic acid \$\$ Benzenecarboxylic acid \$\$ Benzeneformic acid \$\$ Benzenemethanoic acid \$\$ Benzoesaure GK \$\$ Benzoesaure GV \$\$ Carboxyb

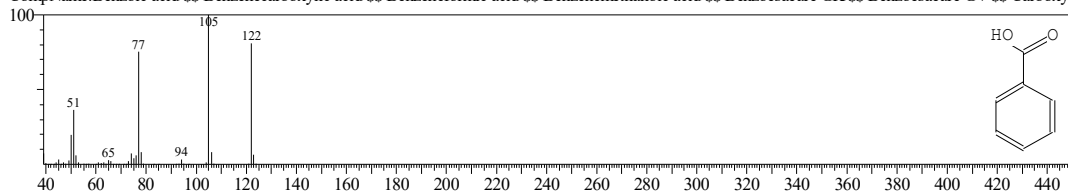

Hit#4 Entry:181394 Library:NIST11s.lib

SI:74 Formula:C21H22N2O6 CAS:0-00-0 MolWeight:398 RetIndex:3397

CompName:Heptanediamide, N,N'-di-benzoyloxy-

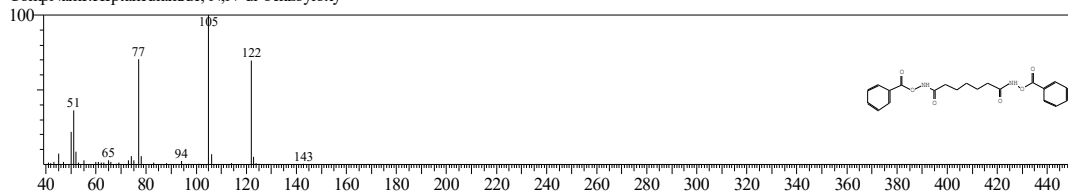

Hit#5 Entry:173955 Library:NIST11s.lib

SI:74 Formula:C20H18N2O6 CAS:0-00-0 MolWeight:382 RetIndex:3294

CompName:Cyclobutane-1,1-dicarboxamide, N,N'-di-benzoyloxy-

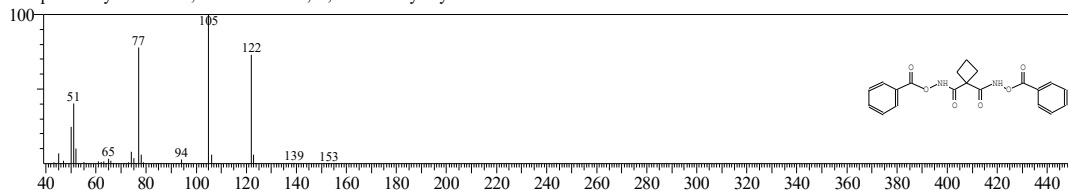

&lt;&lt; Target &gt;&gt;

Line#:10 R.Time:10.775(Scan#:634) MassPeaks:76

RawMode:Single 10.775(634) BasePeak:59.00(50630)

BG Mode:None Group 1 - Event 1

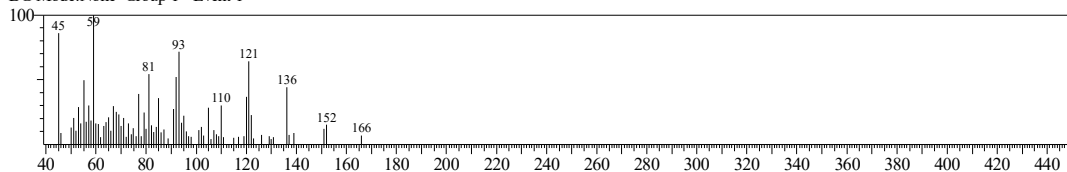

Hit#:1 Entry:17520 Library:NIST11.lib

SE:73 Formula:C10H18O CAS:98-55-5 MolWeight:154 RetIndex:1143

CompName:.alpha.-Terpineol \$\$ 3-Cyclohexene-1-methanol, .alpha.,.alpha.4-trimethyl- \$\$ p-Menth-1-en-8-ol \$\$ Terpineol schlechthin \$\$ Terpineol, .alpha. \$\$

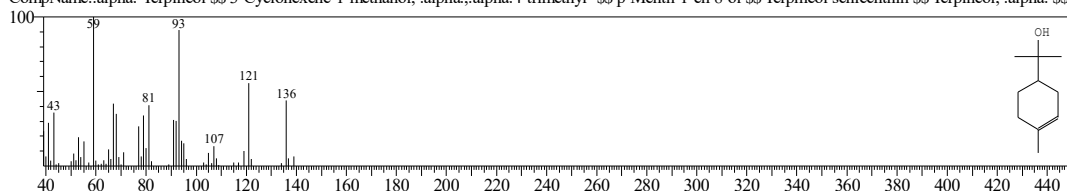

Hit#:2 Entry:17452 Library:NIST11.lib

SE:73 Formula:C10H18O CAS:38092-33-0 MolWeight:154 RetIndex:1100

CompName:trans-2,7-Dimethyl-3,6-octadien-2-ol \$\$ (3E)-2,7-Dimethyl-3,6-octadien-2-ol \$\$ 3,6-Octadien-2-ol, 2,7-dimethyl, (E) \$\$ 3,6-Octadien-2-ol, 2,7-dimethyl, (E) \$\$

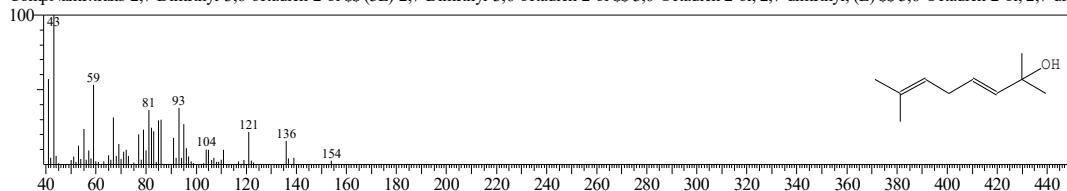

Hit#:3 Entry:17614 Library:NIST11.lib

SE:72 Formula:C10H18O CAS:4017-88-3 MolWeight:154 RetIndex:1125

CompName:Bicyclo[4.1.0]heptan-3-ol, 4,7,7-trimethyl-, [1R-(1.alpha.,3.alpha.,4.beta.,6.alpha.)]- \$\$ 4-Caranol, (1S,3R,4R,6R)-(-) \$\$ 4,7,7-Trimethylbicyclo[4.1.0]heptan-3-ol, (1.alpha.,3.alpha.,4.beta.,6.alpha.)-(-) \$\$

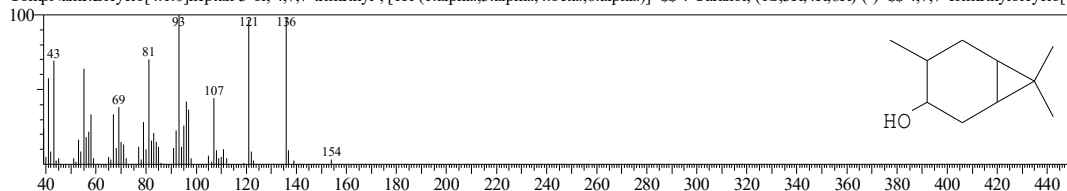

Hit#:4 Entry:17613 Library:NIST11.lib

SE:72 Formula:C10H18O CAS:38748-96-8 MolWeight:154 RetIndex:1125

CompName:Bicyclo[4.1.0]heptan-3-ol, 4,7,7-trimethyl-, (1.alpha.,3.alpha.,4.beta.,6.alpha.)- \$\$ 4,7,7-Trimethylbicyclo[4.1.0]heptan-3-ol, (1.alpha.,3.alpha.,4.beta.,6.alpha.)- \$\$

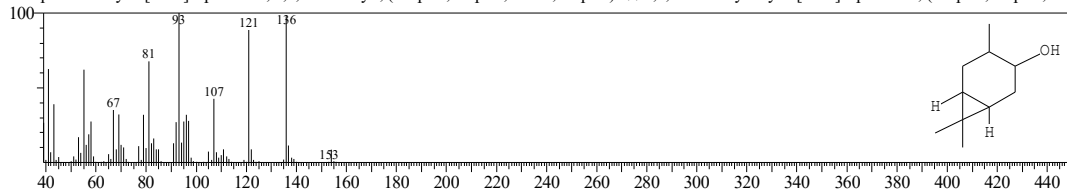

Hit#:5 Entry:17674 Library:NIST11.lib

SE:71 Formula:C10H18O CAS:4017-93-0 MolWeight:154 RetIndex:1125

CompName:Bicyclo[4.1.0]heptan-3-ol, 4,7,7-trimethyl-, [1R-(1.alpha.,3.alpha.,4.beta.,6.alpha.)]- \$\$ 4-Caranol, (1S,3R,4S,6R)-(+)- \$\$ 4,7,7-Trimethylbicyclo[4.1.0]heptan-3-ol, (1.alpha.,3.alpha.,4.beta.,6.alpha.)-(+) \$\$

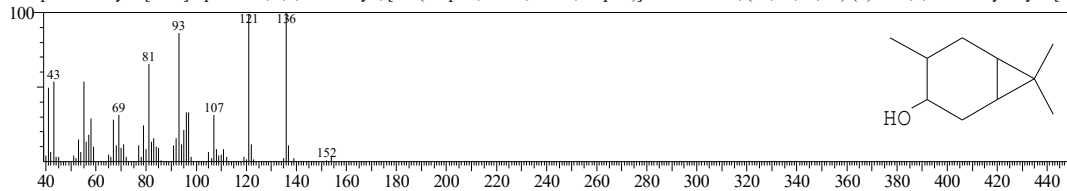

&lt;&lt; Target &gt;&gt;

Line#:11 R.Time:10.950(Scan#:655) MassPeaks:72  
RawMode:Single 10.950(655) BasePeak:45.00(166054)  
BG Mode:None Group 1 - Event 1

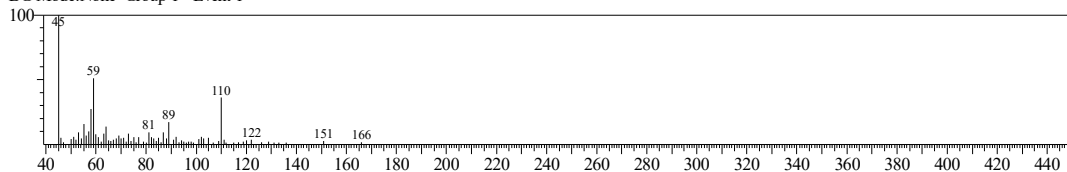

Hit#:1 Entry:14396 Library:NIST11.lib  
SI:71 Formula:C7H16O3 CAS:37587-78-3 MolWeight:148 RetIndex:961  
CompName:1-(Methoxymethoxy)-3-methyl-3-hydroxybutane \$\$ 4-(Methoxymethoxy)-2-methyl-2-butanol # \$\$

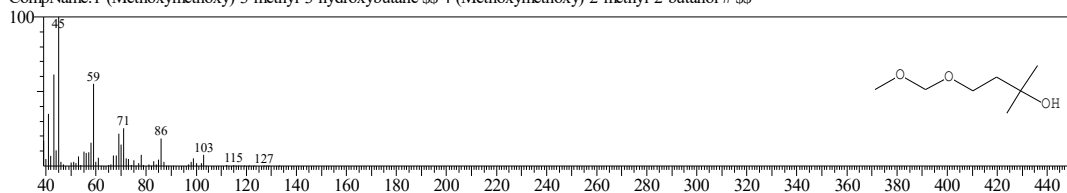

Hit#:2 Entry:69533 Library:NIST11.lib  
SI:70 Formula:C9H19NO6 CAS:13096-67-8 MolWeight:237 RetIndex:1858  
CompName:5-O-Methyl-d-gluconic acid dimethylamide

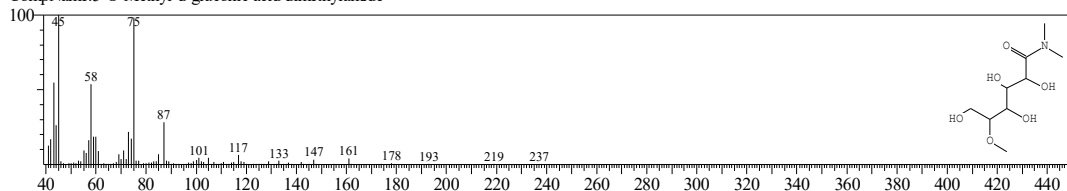

Hit#:3 Entry:22003 Library:NIST11.lib  
SI:69 Formula:C7H16O4 CAS:112-35-6 MolWeight:164 RetIndex:1187  
CompName:Ethanol, 2-[2-(2-methoxyethoxy)ethoxy]- \$\$ Dowanol TMAT \$\$ Methoxytriethylene glycol \$\$ Methoxydiglycol \$\$ Methyltrioxitol \$\$ Triethylene glycol

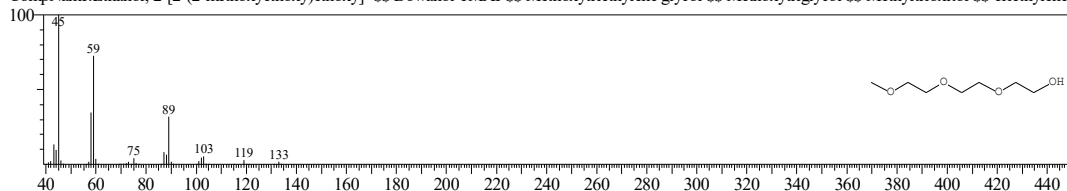

Hit#:4 Entry:163040 Library:NIST11.lib  
SI:69 Formula:C20H42O5 CAS:5274-68-0 MolWeight:362 RetIndex:2556  
CompName:Tetraethylene glycol monododecyl ether \$\$ Tetraethylene glycol mono-n-dodecyl ether \$\$ 3,6,9,12-Tetraoxatetracosan-1-ol \$\$ n-Dodecyl tetraethylene glycol

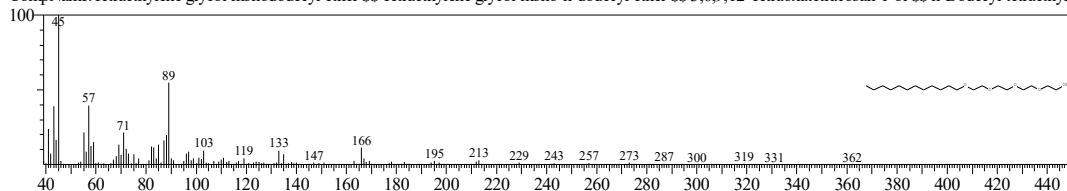

Hit#:5 Entry:29963 Library:NIST11.lib  
SI:69 Formula:C8H18O4 CAS:3011-85-6 MolWeight:178 RetIndex:992  
CompName:Butane, 1,2,3,4-tetramethoxy- \$\$ 1,2,3,4-Tetramethoxybutane # \$\$

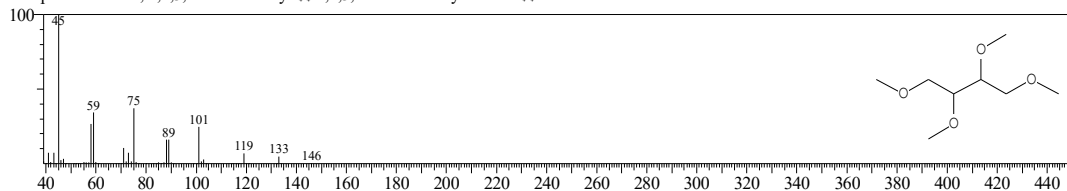

&lt;&lt; Target &gt;&gt;

Line#:12 R.Time:11.083(Scan#:671) MassPeaks:81  
RawMode:Single 11.083(671) BasePeak:120.00(391295)  
BG Mode:None Group 1 - Event 1

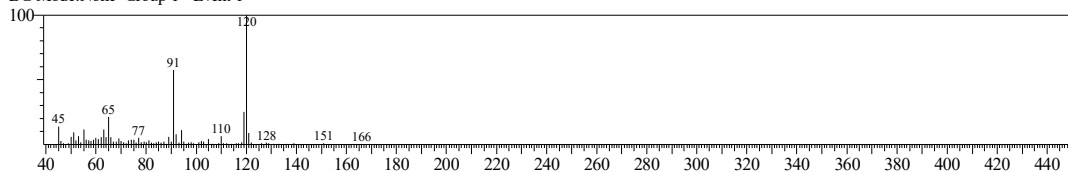

Hit#1 Entry:4095 Library:NIST11s.lib

SE:85 Formula:C8H8O CAS:496-16-2 MolWeight:120 RetIndex:1036

CompName:Benzo[1,2-b:4,5-b']difuran, 2,3-dihydro- \$\$ Coumaran \$\$ Dihydrobenzofuran \$\$ Dihydrocoumarone \$\$ Kumaran \$\$ 2,3-Dihydrobenzofuran \$\$ 2,3-Dihydro-1-ben

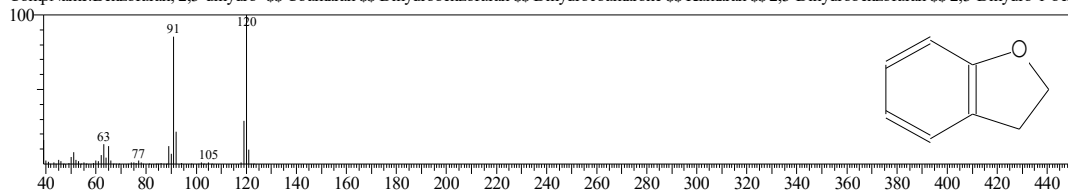

Hit#2 Entry:5306 Library:NIST11s.lib

SE:84 Formula:C8H8O CAS:496-16-2 MolWeight:120 RetIndex:1036

CompName:Benzo[1,2-b:4,5-b']difuran, 2,3-dihydro- \$\$ Coumaran \$\$ Dihydrobenzofuran \$\$ Dihydrocoumarone \$\$ Kumaran \$\$ 2,3-Dihydrobenzofuran \$\$ 2,3-Dihydro-1-ben

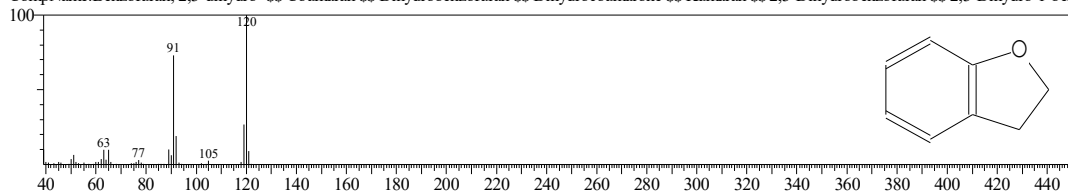

Hit#3 Entry:4094 Library:NIST11s.lib

SE:81 Formula:C8H8O CAS:766-94-9 MolWeight:120 RetIndex:959

CompName:Benzene, (ethenyloxy)- \$\$ Ether, phenyl vinyl \$\$ (Vinyl)benzene \$\$ Phenoxyethene \$\$ Phenoxyethylene \$\$ Phenyl vinyl ether \$\$ Vinyl phenyl e

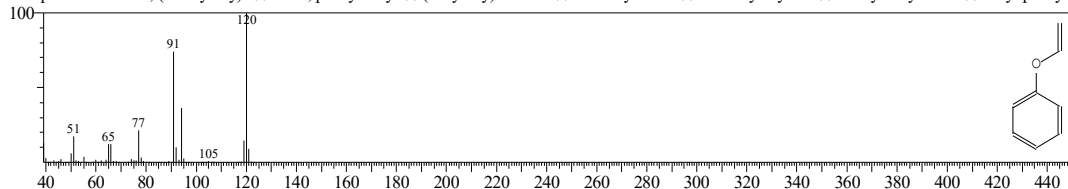

Hit#4 Entry:14596 Library:NIST11s.lib

SE:81 Formula:C10H12O CAS:5459-40-5 MolWeight:148 RetIndex:1172

CompName:4-Ethoxystyrene \$\$ p-Ethoxystyrene \$\$ Benzene, 1-ethenyl-4-ethoxy- \$\$ 1-Ethoxy-4-vinylbenzene # \$\$ p-Vinylphenetole \$\$

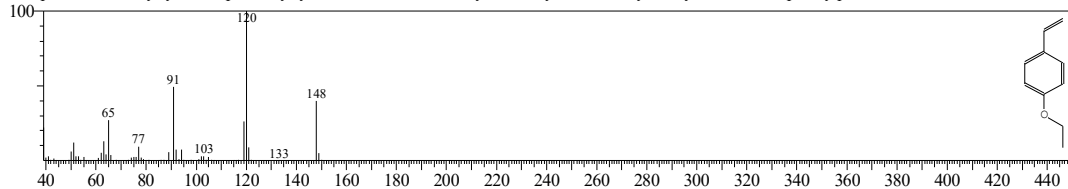

Hit#5 Entry:5304 Library:NIST11s.lib

SE:79 Formula:C8H8O CAS:766-94-9 MolWeight:120 RetIndex:959

CompName:Benzene, (ethenyloxy)- \$\$ Ether, phenyl vinyl \$\$ (Vinyl)benzene \$\$ Phenoxyethene \$\$ Phenoxyethylene \$\$ Phenyl vinyl ether \$\$ Vinyl phenyl e

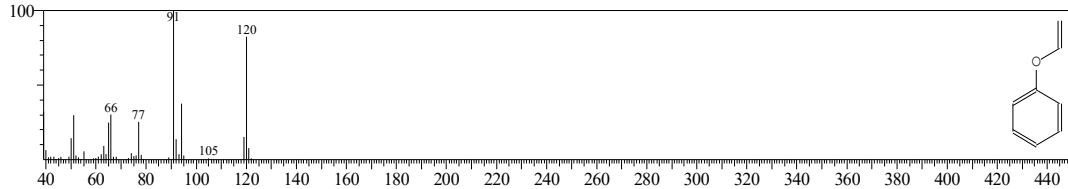

&lt;&lt; Target &gt;&gt;

Line#:13 R.Time:11.217(Scan#:687) MassPeaks:78  
RawMode:Single 11.217(687) BasePeak:96.95(514053)  
BG Mode:None Group 1 - Event 1

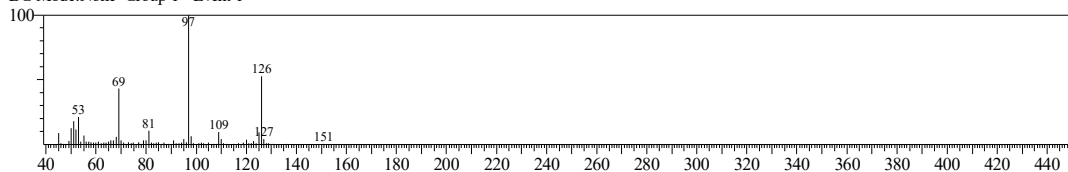

Hit#1 Entry:6369 Library:NIST11s.lib

SE:86 Formula:C6H6O3 CAS:67-47-0 MolWeight:126 RetIndex:1163

CompName:5-Hydroxymethylfurfural \$\$ 2-Furancarboxaldehyde, 5-(hydroxymethyl)- \$\$ 2-Furaldehyde, 5-(hydroxymethyl)- \$\$ HMF \$\$ 5-(Hydroxymethyl)fu

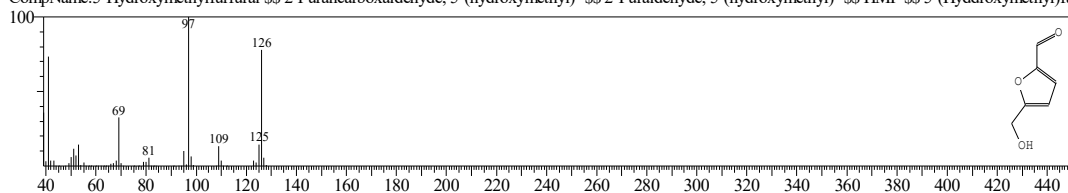

Hit#2 Entry:4729 Library:NIST11s.lib

SE:85 Formula:C6H6O3 CAS:67-47-0 MolWeight:126 RetIndex:1163

CompName:5-Hydroxymethylfurfural \$\$ 2-Furancarboxaldehyde, 5-(hydroxymethyl)- \$\$ 2-Furaldehyde, 5-(hydroxymethyl)- \$\$ HMF \$\$ 5-(Hydroxymethyl)fu

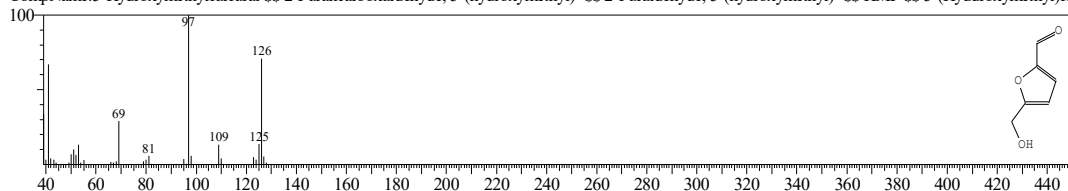

Hit#3 Entry:6505 Library:NIST11s.lib

SE:78 Formula:C8H14O CAS:17325-90-5 MolWeight:126 RetIndex:915

CompName:4-Hexen-3-one, 4,5-dimethyl- \$\$ 4,5-Dimethyl-4-hexen-3-one # \$\$

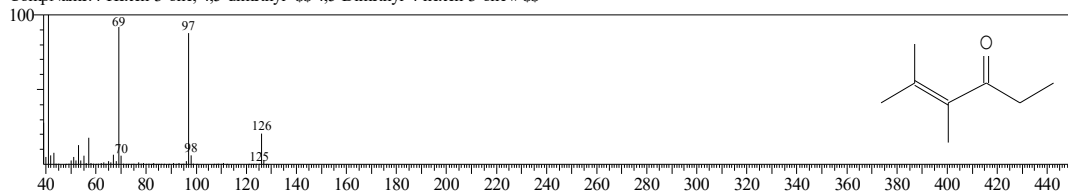

Hit#4 Entry:6506 Library:NIST11s.lib

SE:78 Formula:C8H14O CAS:22319-31-9 MolWeight:126 RetIndex:938

CompName:4-Hepten-3-one, 4-methyl- \$\$ (4E)-4-Methyl-4-hepten-3-one # \$\$

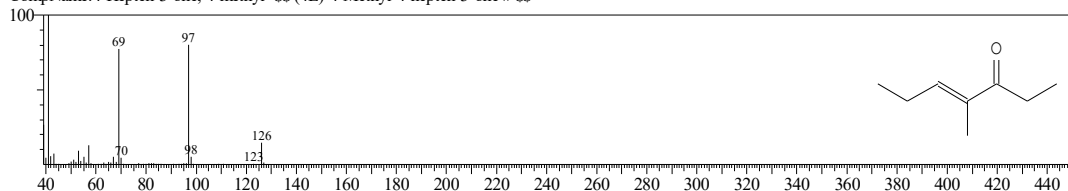

Hit#5 Entry:4793 Library:NIST11s.lib

SE:78 Formula:C7H10S CAS:1551-27-5 MolWeight:126 RetIndex:993

CompName:Thiophene, 2-propyl- \$\$ 2-Propylthiophene \$\$ 2-n-Propylthiophene \$\$

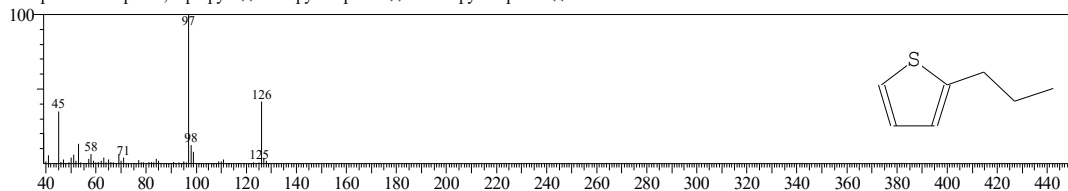

&lt;&lt; Target &gt;&gt;

Line#:14 R.Time:12.325(Scan#:820) MassPeaks:92  
RawMode:Single 12.325(820) BasePeak:150.00(611714)  
BG Mode:None Group 1 - Event 1

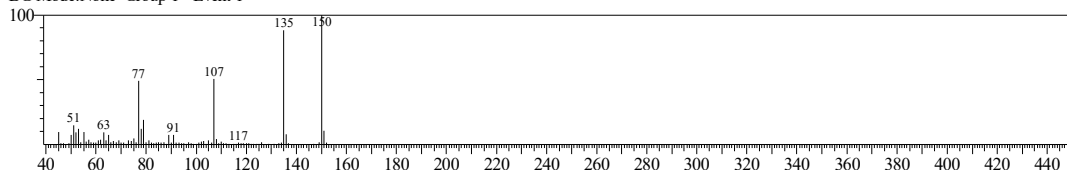

Hit#1 Entry:15257 Library:NIST11s.lib

SE:89 Formula:C9H10O2 CAS:7786-61-0 MolWeight:150 RetIndex:1293

CompName:2-Methoxy-4-vinylphenol \$\$ Phenol, 4-ethenyl-2-methoxy- \$\$ Phenol, 2-methoxy-4-vinyl- \$\$ 4-Hydroxy-3-methoxystyrene \$\$ p-Vinylguaiacol \$\$

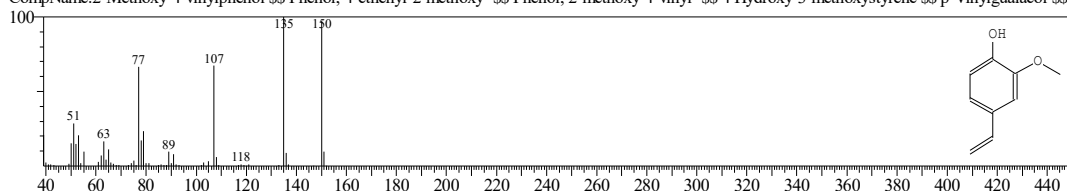

Hit#2 Entry:8936 Library:NIST11s.lib

SE:81 Formula:C9H10O2 CAS:876-02-8 MolWeight:150 RetIndex:1363

CompName:4-Hydroxy-3-methylacetophenone \$\$ 4-Hydroxy-3'-methylacetophenone \$\$ Ethanone, 1-(4-hydroxy-3-methylphenyl)- \$\$ 1-(4-Hydroxy-3-methylph

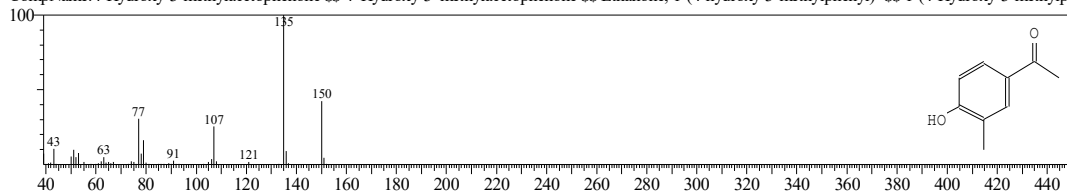

Hit#3 Entry:8932 Library:NIST11s.lib

SE:81 Formula:C9H10O2 CAS:875-59-2 MolWeight:150 RetIndex:1363

CompName:4-Hydroxy-2-methylacetophenone \$\$ 2-Methyl-4-hydroxyacetophenone \$\$ Ethanone, 1-(4-hydroxy-2-methylphenyl)- \$\$ 1-(4-Hydroxy-2-methylph

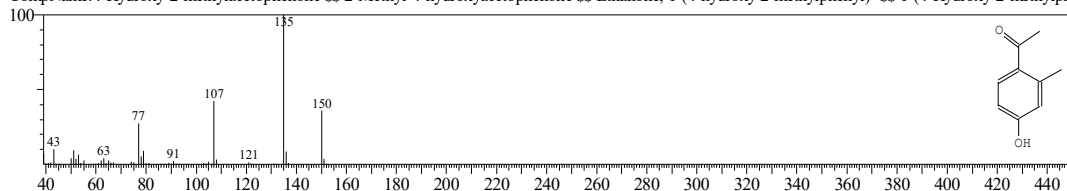

Hit#4 Entry:8934 Library:NIST11s.lib

SE:81 Formula:C9H10O2 CAS:1450-72-2 MolWeight:150 RetIndex:1363

CompName:Ethanone, 1-(2-hydroxy-5-methylphenyl)- \$\$ 1-Hydroxy-2-acetyl-4-methylbenzene \$\$ 2-Hydroxy-5-methylacetophenone \$\$ 2'-Hydroxy-5'-methylac

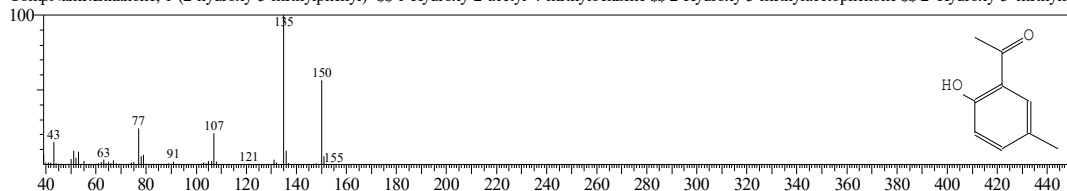

Hit#5 Entry:15258 Library:NIST11s.lib

SE:80 Formula:C9H10O2 CAS:586-37-8 MolWeight:150 RetIndex:1218

CompName:3-Methoxyacetophenone \$\$ Ethanone, 1-(3-methoxyphenyl)- \$\$ Acetophenone, 3'-methoxy- \$\$ 3-Acetylanisole \$\$ 1-Acetyl-3-methoxybenzene \$\$

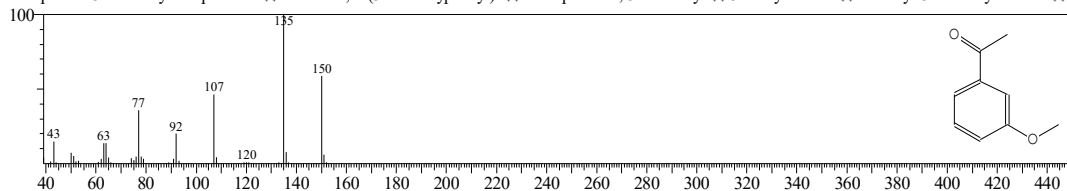

&lt;&lt; Target &gt;&gt;

Line#:15 R.Time:13.300(Scan#:937) MassPeaks:110  
RawMode:Single 13.300(937) BasePeak:126.00(104366)  
BG Mode:None Group 1 - Event 1

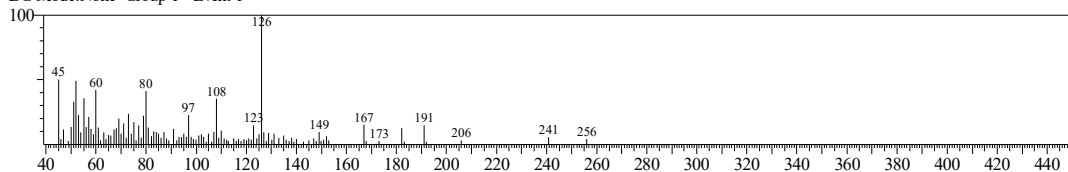

Hit#:1 Entry:4731 Library:NIST11s.lib

SE:68 Formula:C<sub>6</sub>H<sub>6</sub>O<sub>3</sub> CAS:533-73-3 MolWeight:126 RetIndex:1342

CompName:1,2,4-Benzenetriol \$\$ 1,3,4-Benzenetriol \$\$ 2,5-Dihydroxyphenol \$\$ Hydroxyhydroquinone \$\$ 2-Hydroxy-1,4-hydroquinone \$\$ 1,2,4-Trihydroxyb

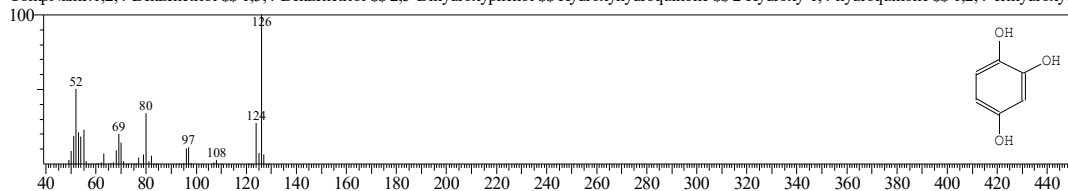

Hit#:2 Entry:17145 Library:NIST11s.lib

SE:64 Formula:C<sub>8</sub>H<sub>10</sub>O<sub>3</sub> CAS:85-42-7 MolWeight:154 RetIndex:1378

CompName:1,3-Isobenzofurandione, hexahydro- \$\$ 1,2-Cyclohexanedicarboxylic anhydride \$\$ Araldite HT 907 \$\$ Hexahydrophthalic acid anhydride \$\$ Hexah

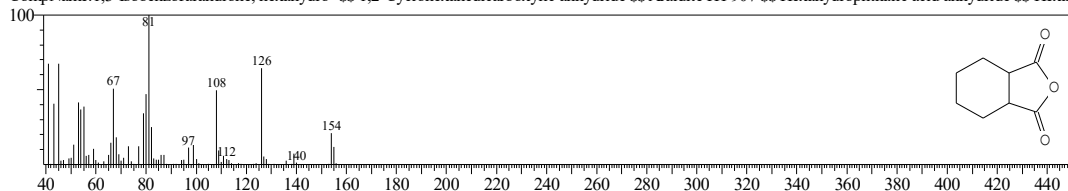

Hit#:3 Entry:6522 Library:NIST11s.lib

SE:64 Formula:C<sub>8</sub>H<sub>14</sub>O CAS:3197-68-0 MolWeight:126 RetIndex:1053

CompName:Ethanol, 1-(1-cyclohexenyl)- \$\$ 1-(1-Cyclohexen-1-yl)ethanol # \$\$

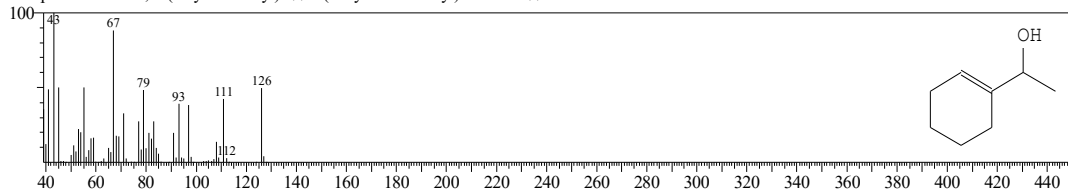

Hit#:4 Entry:12726 Library:NIST11s.lib

SE:64 Formula:C<sub>6</sub>H<sub>8</sub>O<sub>4</sub> CAS:0-00-0 MolWeight:144 RetIndex:1293

CompName:2,3-Dimethylfumaric acid \$\$ (2E)-2,3-Dimethyl-2-butenedioic acid # \$\$

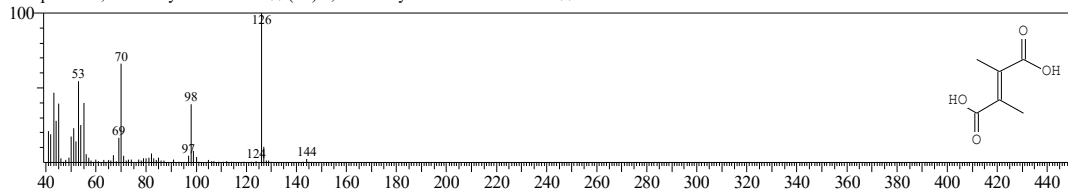

Hit#:5 Entry:43722 Library:NIST11s.lib

SE:64 Formula:C<sub>10</sub>H<sub>16</sub>O<sub>4</sub> CAS:0-00-0 MolWeight:200 RetIndex:1651

CompName:4a-(1-Hydroxy-ethyl)-hexahydrobenzo[1,3]dioxin-4-one \$\$ 4a-(1-Hydroxyethyl)hexahydro-4H-1,3-benzodioxin-4-one # \$\$

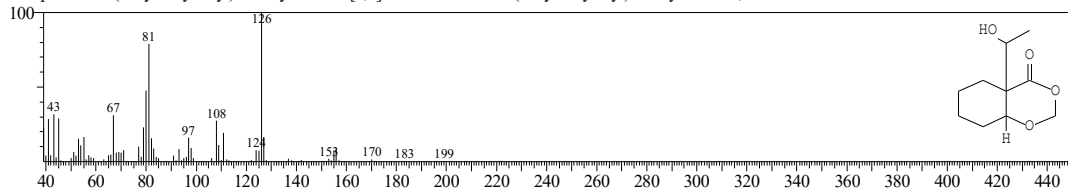



&lt;&lt; Target &gt;&gt;

Line#:16 R.Time:13.917(Scan#:1011) MassPeaks:115  
RawMode:Single 13.917(1011) BasePeak:136.00(407423)  
BG Mode:None Group 1 - Event 1

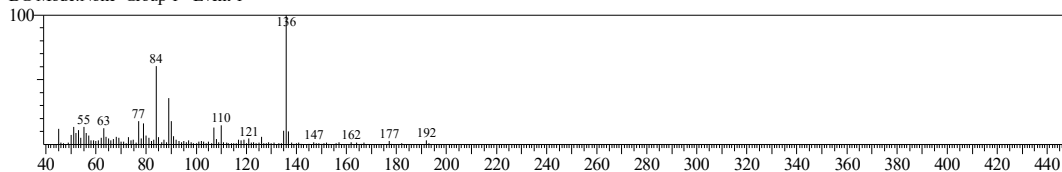

Hit#1 Entry:11540 Library:NIST11s.lib  
SI:70 Formula:C<sub>9</sub>H<sub>8</sub>O<sub>3</sub> CAS:7310-95-4 MolWeight:164 RetIndex:1617  
CompName:2-Hydroxy-5-methylisophthalaldehyde \$\$ 1,3-Benzenedicarboxaldehyde, 2-hydroxy-5-methyl- \$\$

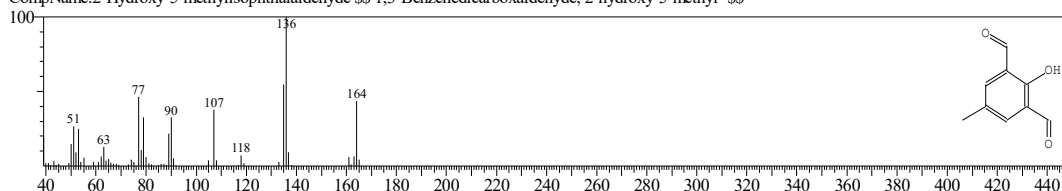

Hit#2 Entry:22854 Library:NIST11s.lib  
SI:68 Formula:C<sub>10</sub>H<sub>15</sub>NO CAS:39590-27-7 MolWeight:165 RetIndex:1425  
CompName:2-Ethoxyphenethylamine \$\$ 2-(2-Ethoxyphenyl)ethanamine # \$\$

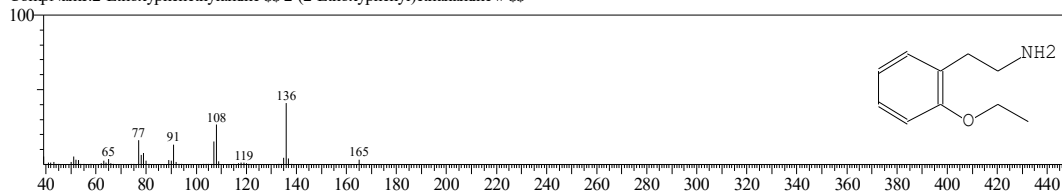

Hit#3 Entry:24227 Library:NIST11s.lib  
SI:68 Formula:C<sub>8</sub>H<sub>8</sub>O<sub>4</sub> CAS:2411-83-8 MolWeight:168 RetIndex:1502  
CompName:Benzoic acid, 2,3-dihydroxy-, methyl ester \$\$ o-Pyrocatechuic acid, methyl ester \$\$ Methyl 2,3-dihydroxybenzoate \$\$

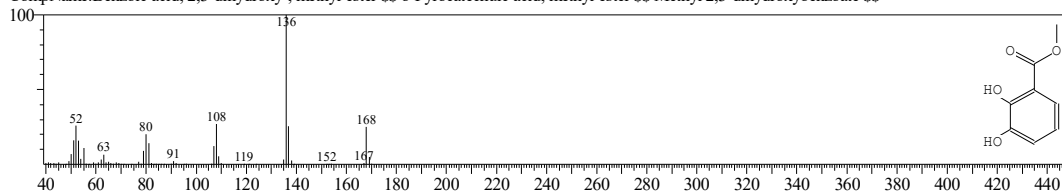

Hit#4 Entry:9482 Library:NIST11s.lib  
SI:68 Formula:C<sub>7</sub>H<sub>8</sub>N<sub>2</sub>O CAS:0-00-0 MolWeight:136 RetIndex:1204  
CompName:3H-Cyclopenta[c]pyridazin-3-one, 2,5,6,7-tetrahydro-

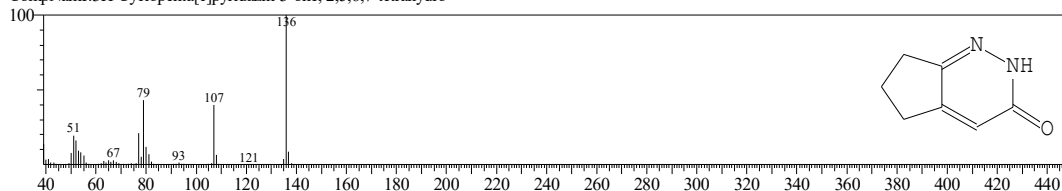

Hit#5 Entry:9536 Library:NIST11s.lib  
SI:68 Formula:C<sub>8</sub>H<sub>8</sub>O<sub>2</sub> CAS:90111-15-2 MolWeight:136 RetIndex:1316  
CompName:3-Hydroxy-2-methylbenzaldehyde

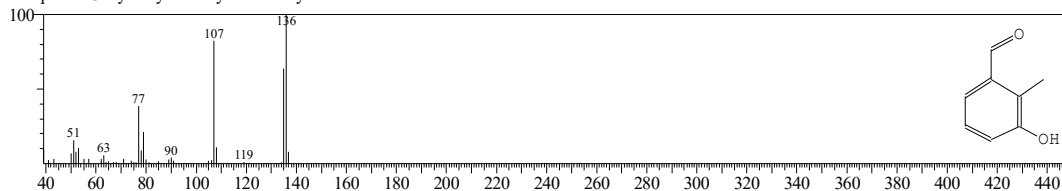

&lt;&lt; Target &gt;&gt;

Line#:17 R.Time:14.433(Scan#:1073) MassPeaks:123  
RawMode:Single 14.433(1073) BasePeak:191.05(194669)  
BG Mode:None Group 1 - Event 1

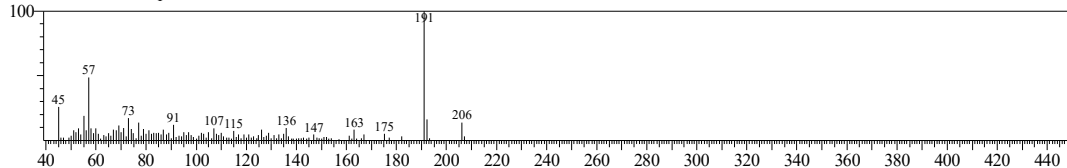

Hit#:1 Entry:163932 Library:NIST11s.lib

SE:68 Formula:C14H20O9S CAS:0-00-0 MolWeight:364 RetIndex:3173

CompName:3-Tosyl sedoheptulose \$\$ 3-O-[(4-Methylphenyl)sulfonyl]hept-2-ulopyranose # \$\$

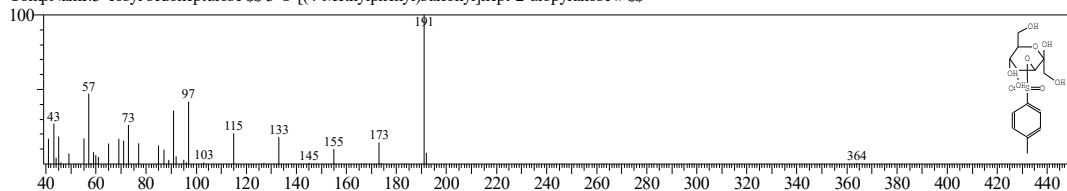

Hit#:2 Entry:18376 Library:NIST11s.lib

SE:67 Formula:C14H22O CAS:128-39-2 MolWeight:206 RetIndex:1555

CompName:Phenol, 2,6-bis(1,1-dimethylethyl)- \$\$ Phenol, 2,6-di-tert-butyl- \$\$ 2,6-Bis(tert-butyl)phenol \$\$ 2,6-Bis(1,1-dimethylethyl)phenol \$\$ 2,6-Di-tert-bu

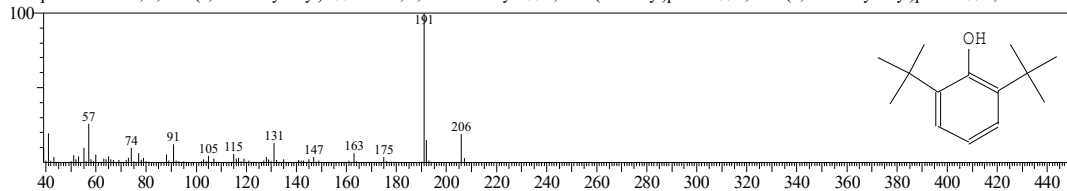

Hit#:3 Entry:18381 Library:NIST11s.lib

SE:66 Formula:C14H22O CAS:1138-52-9 MolWeight:206 RetIndex:1555

CompName:Phenol, 3,5-bis(1,1-dimethylethyl)- \$\$ Phenol, 3,5-di-tert-butyl- \$\$ 3,5-Di-tert-butylphenol \$\$ Phenol, 3,5-bis(t-butyl) \$\$ 3,5-Di-t-butylphenol \$\$ 3

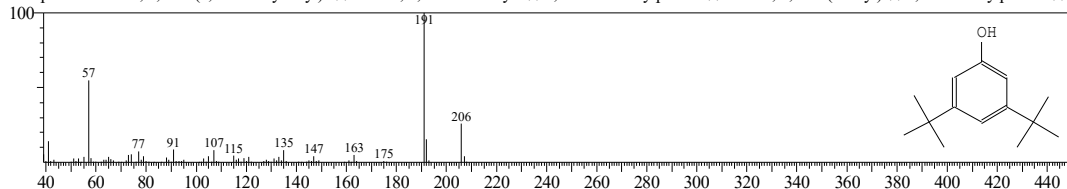

Hit#:4 Entry:18382 Library:NIST11s.lib

SE:66 Formula:C14H22O CAS:1138-52-9 MolWeight:206 RetIndex:1555

CompName:Phenol, 3,5-bis(1,1-dimethylethyl)- \$\$ Phenol, 3,5-di-tert-butyl- \$\$ 3,5-Di-tert-butylphenol \$\$ Phenol, 3,5-bis(t-butyl) \$\$ 3,5-Di-t-butylphenol \$\$ 3

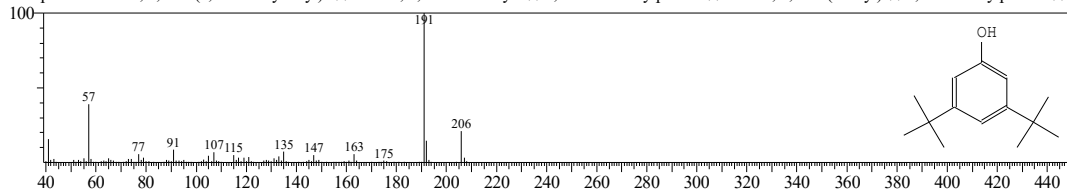

Hit#:5 Entry:18377 Library:NIST11s.lib

SE:65 Formula:C14H22O CAS:96-76-4 MolWeight:206 RetIndex:1555

CompName:Phenol, 2,4-bis(1,1-dimethylethyl)- \$\$ Phenol, 2,4-di-tert-butyl- \$\$ 2,4-Di-tert-butylphenol \$\$ 2,4-di-t-Butylphenol \$\$ 1-Hydroxy-2,4-di-tert-butyl

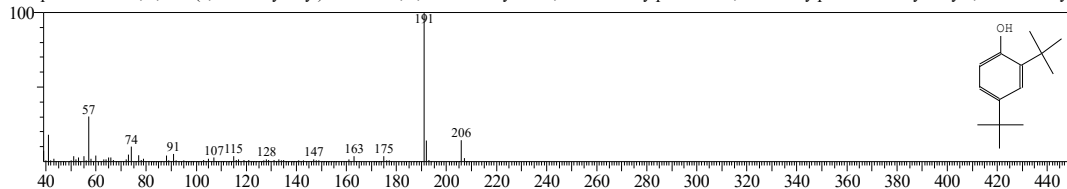

&lt;&lt; Target &gt;&gt;

Line#:18 R.Time:14.667(Scan#:1101) MassPeaks:128  
RawMode:Single 14.667(1101) BasePeak:127.00(152826)  
BG Mode:None Group 1 - Event 1

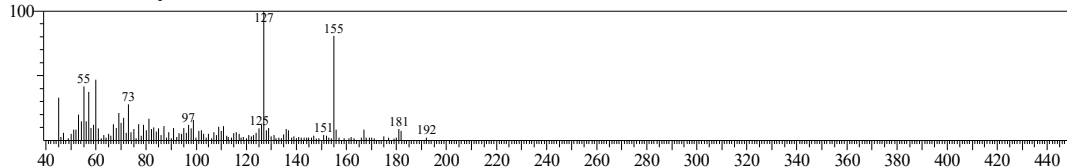

Hit#1 Entry:24277 Library:NIST11.lib  
SI:72 Formula:C16H30O3 CAS:623-66-5 MolWeight:270 RetIndex:1915  
CompName:Caprylic anhydride \$\$ Octanoic acid, anhydride \$\$ Octanoic anhydride \$\$

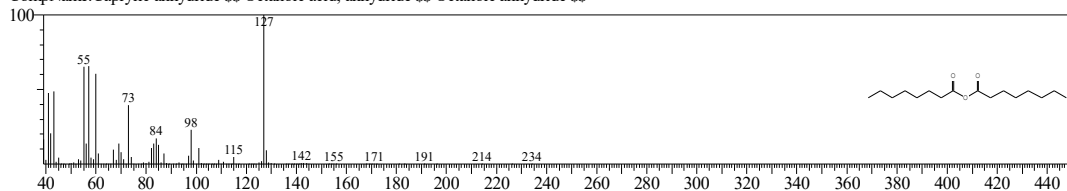

Hit#2 Entry:63632 Library:NIST11.lib  
SI:71 Formula:C13H24O3 CAS:2649-93-6 MolWeight:228 RetIndex:1669  
CompName:Azelaaldehydic acid, butyl ester \$\$ Butyl 9-oxononanoate # \$\$

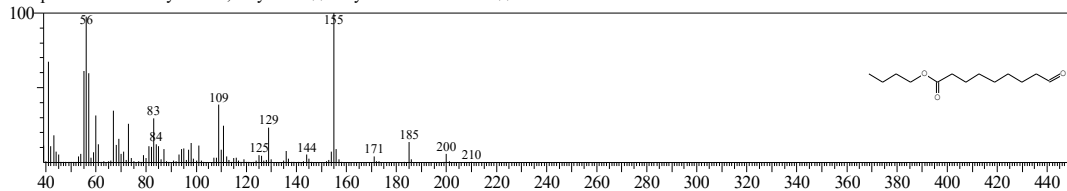

Hit#3 Entry:53448 Library:NIST11.lib  
SI:71 Formula:C12H22O3 CAS:34208-02-1 MolWeight:214 RetIndex:1506  
CompName:Nonanoic acid, 9-oxo-, 1-methylethyl ester \$\$ Isopropyl 9-oxononanoate # \$\$

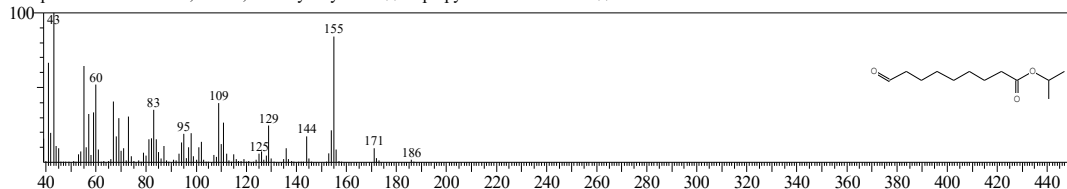

Hit#4 Entry:43702 Library:NIST11.lib  
SI:70 Formula:C10H16O4 CAS:13687-98-4 MolWeight:200 RetIndex:1354  
CompName:2H-Pyran-2-carboxylic acid, 6-ethoxy-3,6-dihydro-, ethyl ester \$\$ Ethyl 6-ethoxy-3,6-dihydro-2H-pyran-2-carboxylate # \$\$

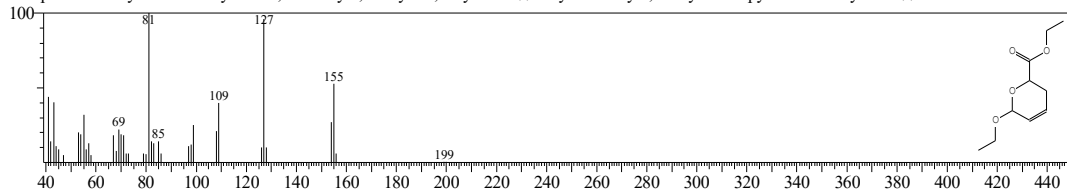

Hit#5 Entry:34004 Library:NIST11.lib  
SI:70 Formula:C11H24Si CAS:98213-23-1 MolWeight:184 RetIndex:1033  
CompName:Silane, triethyl-1-pentenyl- \$\$ Triethyl[(1E)-1-pentenyl]silane # \$\$

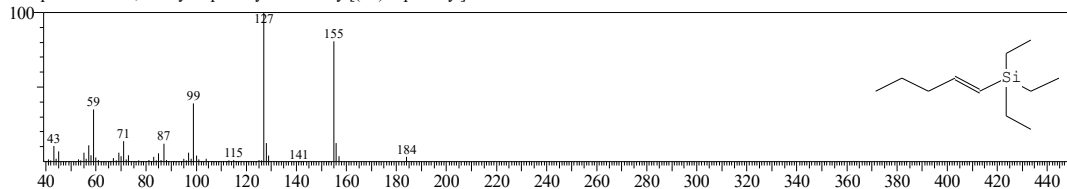

&lt;&lt; Target &gt;&gt;

Line#:19 R.Time:14.750(Scan#:1111) MassPeaks:124  
RawMode:Single 14.750(1111) BasePeak:111.00(82951)  
BG Mode:None Group 1 - Event 1

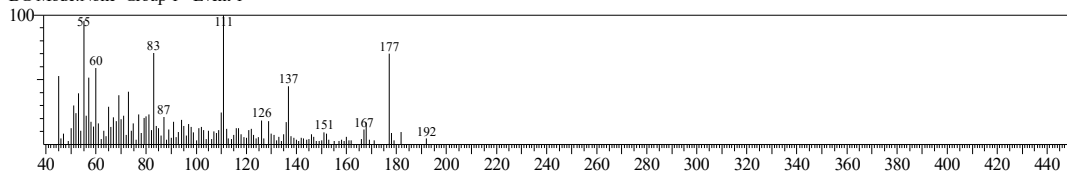

Hit#:1 Entry:6538 Library:NIST11.lib

SE:67 Formula:C8H14O CAS:0-00-0 MolWeight:126 RetIndex:1024

CompName:4,4-Dimethyl-cyclohex-2-en-1-ol \$ 4,4-Dimethyl-2-cyclohexen-1-ol # \$ \$

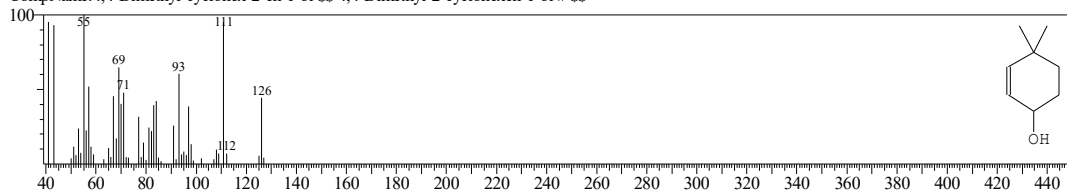

Hit#:2 Entry:81228 Library:NIST11.lib

SE:66 Formula:C16H28O2 CAS:459-67-6 MolWeight:252 RetIndex:1993

CompName:11-(2-Cyclopenten-1-yl)undecanoic acid, (+)- \$ Hydnocarpic acid \$ 2-Cyclopentene-1-undecanoic acid \$ Isolated from chaulmoogra oil \$ 11-(2

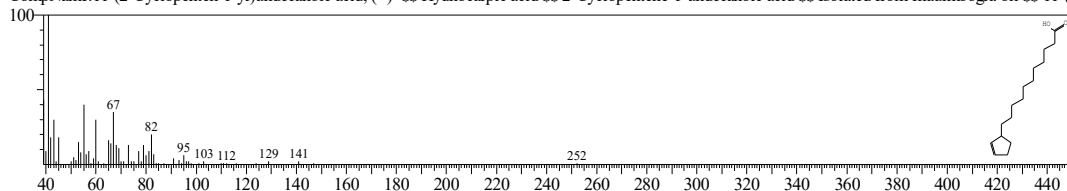

Hit#:3 Entry:82667 Library:NIST11.lib

SE:65 Formula:C16H30O2 CAS:6053-49-2 MolWeight:254 RetIndex:2011

CompName:Cyclopentaneundecanoic acid \$ 11-Cyclopentylundecanoic acid # \$ \$

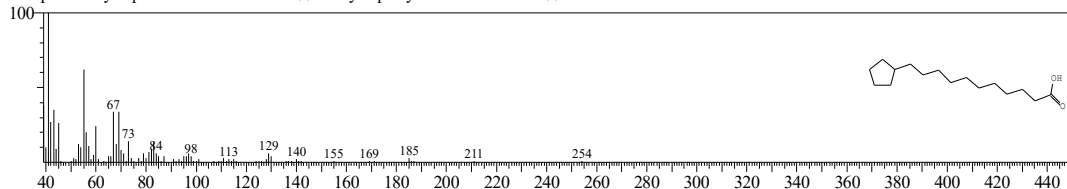

Hit#:4 Entry:51953 Library:NIST11.lib

SE:65 Formula:C11H16O4 CAS:117132-08-8 MolWeight:212 RetIndex:1610

CompName:9,9-Dimethoxybicyclo[3.3.1]nona-2,4-dione \$ 9,9-Dimethoxybicyclo[3.3.1]nonane-2,4-dione # \$ \$

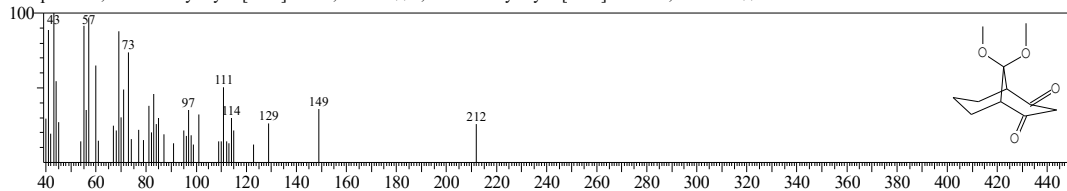

Hit#:5 Entry:25037 Library:NIST11s.lib

SE:63 Formula:C18H34O2 CAS:112-80-1 MolWeight:282 RetIndex:2175

CompName:Oleic Acid \$ 9-Octadecenoic acid (Z)- \$ .DELTA.9-cis-Oleic acid \$ cis-Oleic Acid \$ cis-9-Octadecenoic Acid \$ Emersol 211 \$ Emersol 220 V

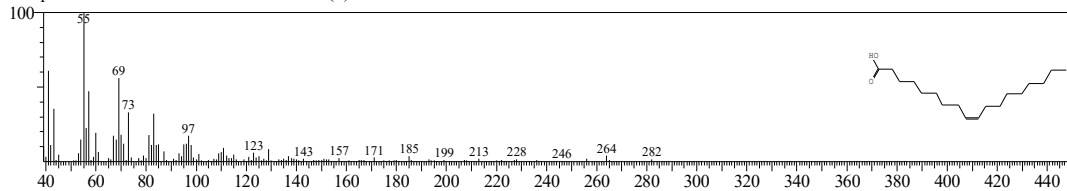

&lt;&lt; Target &gt;&gt;

Line#:20 R.Time:14.867(Scan#:1125) MassPeaks:120  
RawMode:Single 14.867(1125) BasePeak:111.00(97066)  
BG Mode:None Group 1 - Event 1

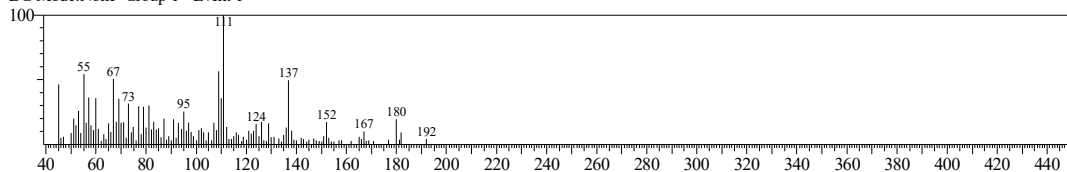

Hit#:1 Entry:17641 Library:NIST11.lib  
SI:72 Formula:C10H18O CAS:6909-22-4 MolWeight:154 RetIndex:1125  
CompName:5-Caranol, trans,trans-(+)-  $\text{5,4,7,7-Trimethylbicyclo[4.1.0]heptan-2-ol}$  # \$\$

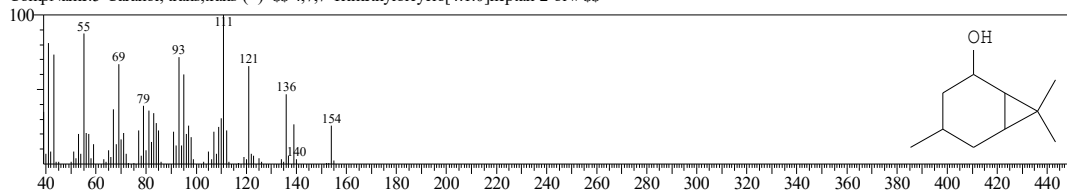

Hit#:2 Entry:25933 Library:NIST11.lib  
SI:72 Formula:C10H18O2 CAS:13837-85-9 MolWeight:170 RetIndex:1326  
CompName:Bicyclo[2.2.1]heptane-2,3-diol, 1,7,7-trimethyl-, (2-endo,3-exo)-  $\text{5,5,7,7-Trimethylbicyclo[2.2.1]heptane-2,3-diol}$  # \$\$

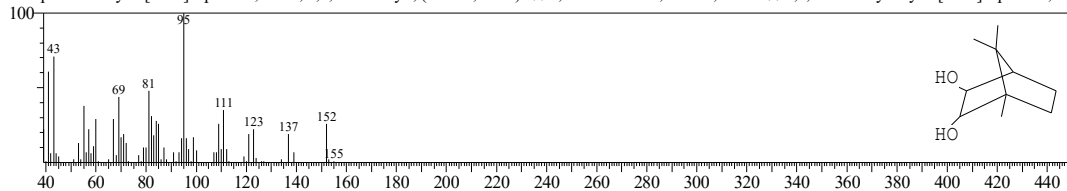

Hit#:3 Entry:17610 Library:NIST11.lib  
SI:71 Formula:C10H18O CAS:6909-21-3 MolWeight:154 RetIndex:1125  
CompName:5-Caranol, (1S,3R,5S,6R)-  $\text{5,4,7,7-Trimethylbicyclo[4.1.0]heptan-2-ol}$  # \$\$

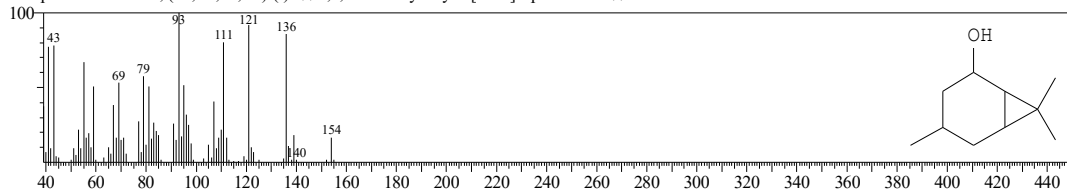

Hit#:4 Entry:25934 Library:NIST11.lib  
SI:71 Formula:C10H18O2 CAS:56614-57-4 MolWeight:170 RetIndex:1326  
CompName:Bicyclo[2.2.1]heptane-2,3-diol, 1,7,7-trimethyl-, (exo,exo)-  $\text{5,5,7,7-Trimethylbicyclo[2.2.1]heptane-2,3-diol}$  # \$\$

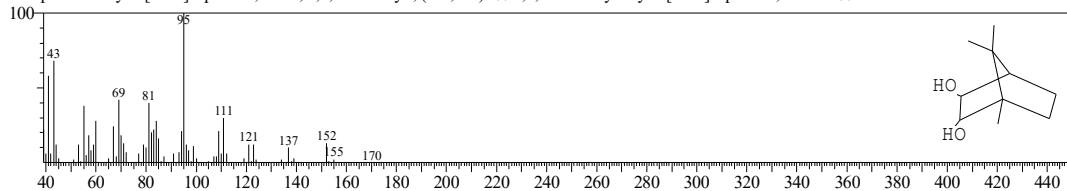

Hit#:5 Entry:6538 Library:NIST11.lib  
SI:71 Formula:C8H14O CAS:0-00-0 MolWeight:126 RetIndex:1024  
CompName:4,4-Dimethyl-cyclohex-2-en-1-ol  $\text{4,4-Dimethyl-2-cyclohexen-1-ol}$  # \$\$

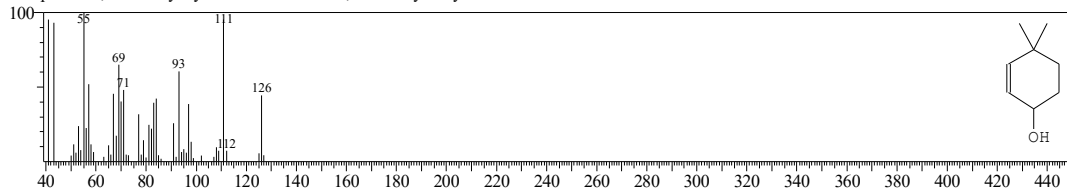

&lt;&lt; Target &gt;&gt;

Line#:21 R.Time:14.975(Scan#:1138) MassPeaks:126  
RawMode:Single 14.975(1138) BasePeak:180.00(65004)  
BG Mode:None Group 1 - Event 1

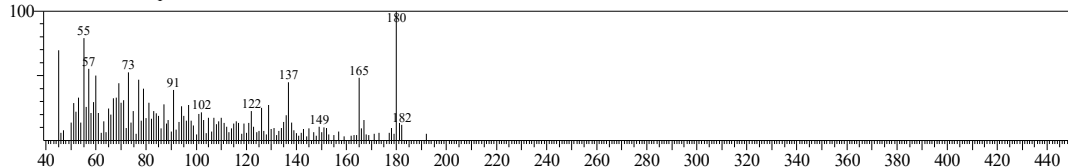

Hit#1 Entry:81228 Library:NIST11.lib

SE:68 Formula:C16H28O2 CAS:459-67-6 MolWeight:252 RetIndex:1993

CompName:11-(2-Cyclopenten-1-yl)undecanoic acid, (+)- \$\$ Hydnocarpic acid \$\$ 2-Cyclopentene-1-undecanoic acid \$\$ Isolated from chaulmoogra oil \$\$ 11-(2

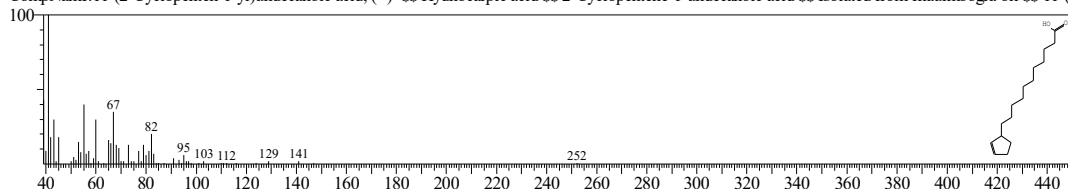

Hit#2 Entry:82667 Library:NIST11.lib

SE:62 Formula:C16H30O2 CAS:6053-49-2 MolWeight:254 RetIndex:2011

CompName:Cyclopentaneundecanoic acid \$\$ 11-Cyclopentylundecanoic acid # \$\$

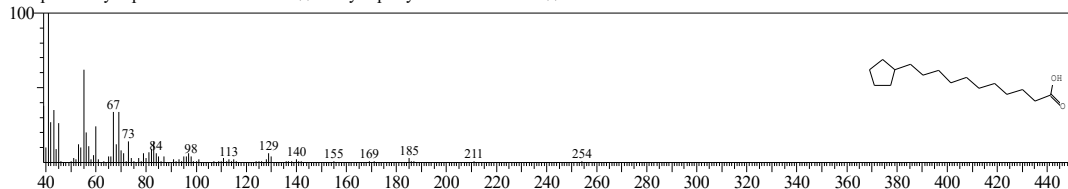

Hit#3 Entry:51953 Library:NIST11.lib

SE:61 Formula:C11H16O4 CAS:117132-08-8 MolWeight:212 RetIndex:1610

CompName:9,9-Dimethoxybicyclo[3.3.1]nonane-2,4-dione \$\$ 9,9-Dimethoxybicyclo[3.3.1]nonane-2,4-dione # \$\$

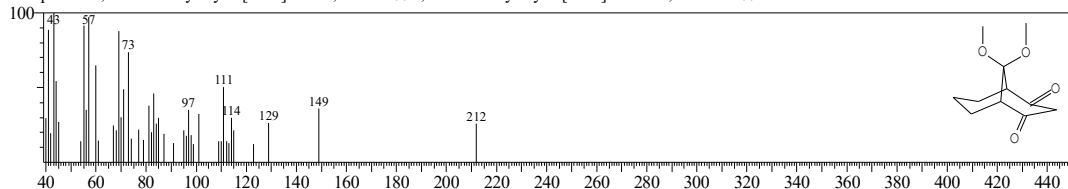

Hit#4 Entry:90501 Library:NIST11.lib

SE:60 Formula:C18H32O CAS:56630-94-5 MolWeight:264 RetIndex:2077

CompName:6,9,12-Octadecatrien-1-ol \$\$ (6E,9E,12E)-6,9,12-Octadecatrien-1-ol # \$\$

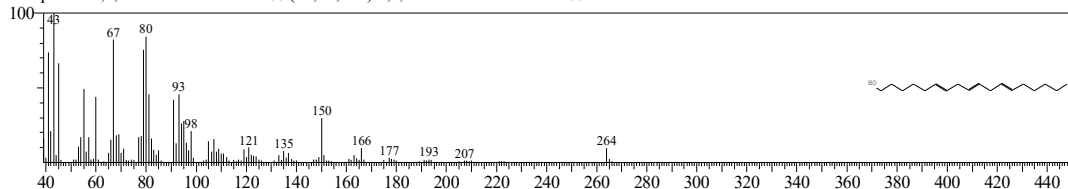

Hit#5 Entry:14742 Library:NIST11s.lib

SE:60 Formula:C11H18O2 CAS:2777-65-3 MolWeight:182 RetIndex:1469

CompName:Undec-10-ynoic acid \$\$ 10-Undecynoic acid \$\$ Undec-1-yn-11-oic acid \$\$ Hendecynoic acid \$\$

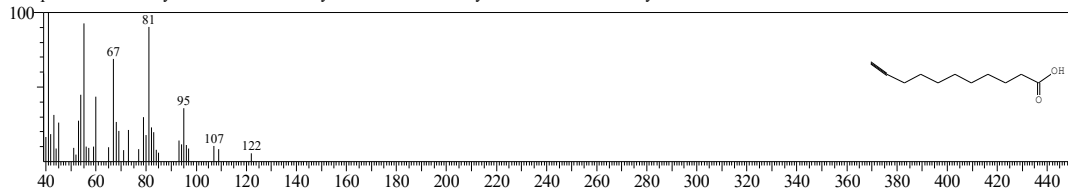

&lt;&lt; Target &gt;&gt;

Line#:22 R.Time:15.058(Scan#:1148) MassPeaks:126  
RawMode:Single 15.058(1148) BasePeak:126.95(363272)  
BG Mode:None Group 1 - Event 1

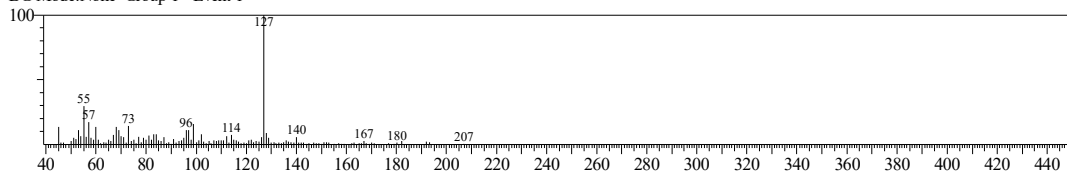

Hit#:1 Entry:6770 Library:NIST11.lib

SI:75 Formula:C4H5N3O2 CAS:0-00-0 MolWeight:127 RetIndex:1241

CompName:4-Hydroxy-2-hydroxyaminopyrimidine 2-(Hydroxyamino)-4-pyrimidinol # \$

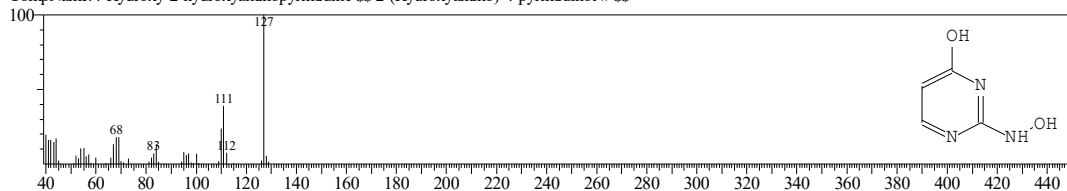

Hit#:2 Entry:28087 Library:NIST11.lib

SI:74 Formula:C22H44O2 CAS:55193-79-8 MolWeight:340 RetIndex:2311

CompName:Octanoic acid, 1-methyltridecyl ester \$ Octanoic acid, 2-tetradecyl ester \$ 1-Methyltridecyl octanoate # \$

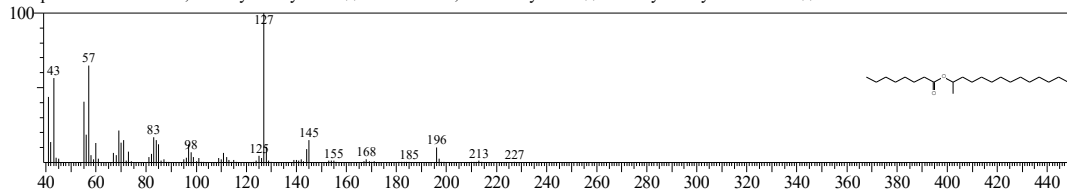

Hit#:3 Entry:18522 Library:NIST11.lib

SI:74 Formula:C9H16O2 CAS:38401-84-2 MolWeight:156 RetIndex:1132

CompName:1,6-Dioxaspiro[4.4]nonane, 2-ethyl- \$ 2-Ethyl-1,6-dioxaspiro[4.4]nonane # \$

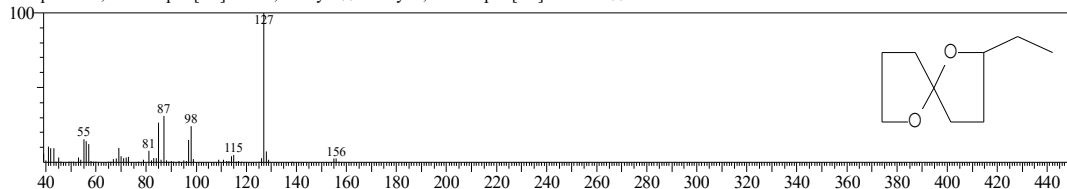

Hit#:4 Entry:52130 Library:NIST11.lib

SI:73 Formula:C12H20O3 CAS:35972-92-0 MolWeight:212 RetIndex:1510

CompName:Spiro[bicyclo[2.2.1]heptane-2,2'-[1,3]dioxolane]-3-ol, 4,7,7-trimethyl-

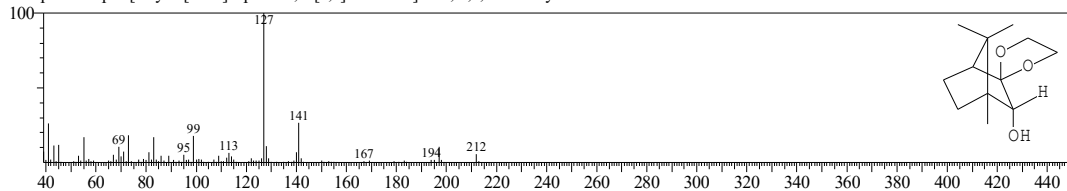

Hit#:5 Entry:158437 Library:NIST11.lib

SI:73 Formula:C23H46O2 CAS:0-00-0 MolWeight:354 RetIndex:2411

CompName:Octanoic acid, 4-pentadecyl ester \$ 1-Propyldodecyl octanoate # \$

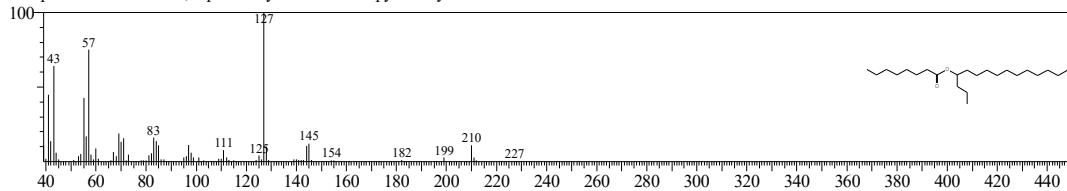

&lt;&lt; Target &gt;&gt;

Line#:23 R.Time:15.142(Scan#:1158) MassPeaks:125  
RawMode:Single 15.142(1158) BasePeak:55.00(221737)  
BG Mode:None Group 1 - Event 1

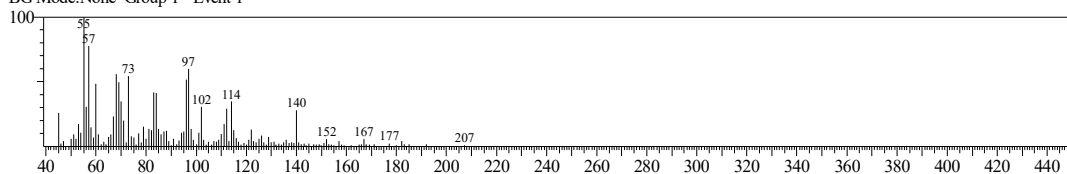

Hit#:1 Entry:19273 Library:NIST11.lib  
SE:80 Formula:C8H14O3 CAS:15458-61-4 MolWeight:158 RetIndex:1347  
CompName:9-Oxabicyclo[3.3.1]nonane-2,6-diol

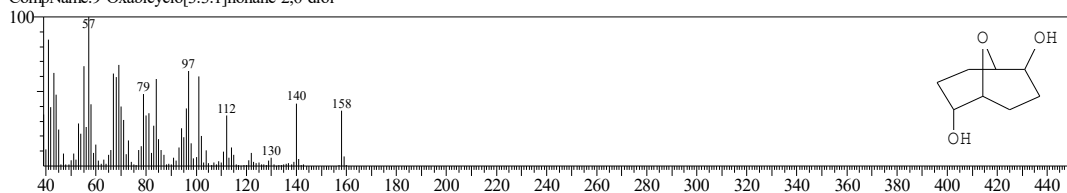

Hit#:2 Entry:51953 Library:NIST11.lib  
SE:78 Formula:C11H16O4 CAS:117132-08-8 MolWeight:212 RetIndex:1610  
CompName:9,9-Dimethoxybicyclo[3.3.1]nona-2,4-dione \$\$ 9,9-Dimethoxybicyclo[3.3.1]nonane-2,4-dione # \$\$

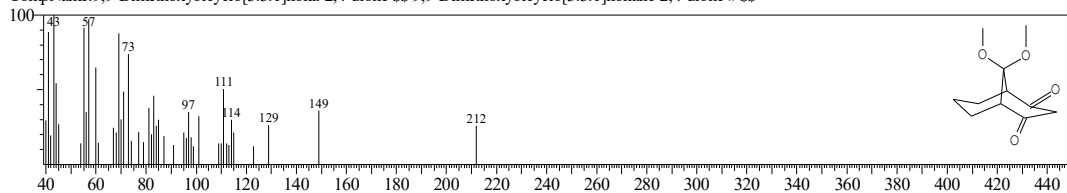

Hit#:3 Entry:33865 Library:NIST11.lib  
SE:77 Formula:C11H20O2 CAS:15790-94-0 MolWeight:184 RetIndex:1479  
CompName:trans-2-undecenoic acid \$\$ (2E)-2-Undecenoic acid # \$\$

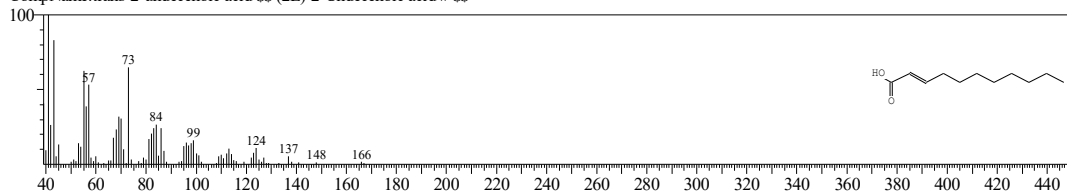

Hit#:4 Entry:33864 Library:NIST11.lib  
SE:77 Formula:C11H20O2 CAS:4189-02-0 MolWeight:184 RetIndex:1479  
CompName:2-Undecenoic acid \$\$ Undec-2-enoic acid # \$

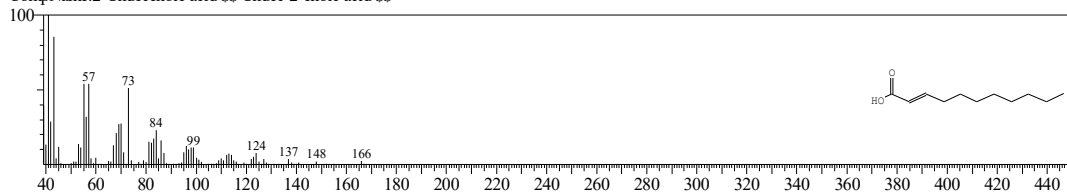

Hit#:5 Entry:42675 Library:NIST11.lib  
SE:76 Formula:C12H22O2 CAS:4412-16-2 MolWeight:198 RetIndex:1578  
CompName:2-Dodecenoic acid \$\$ Dodec-2-enoic acid # \$

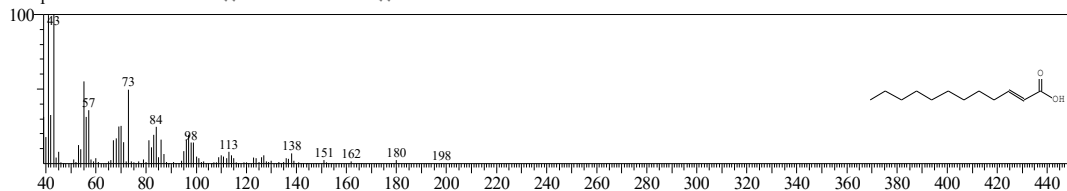



&lt;&lt; Target &gt;&gt;

Line#:24 R.Time:15.625(Scan#:1216) MassPeaks:135

RawMode:Single 15.625(1216) BasePeak:91.00(68652)

BG Mode:None Group 1 - Event 1

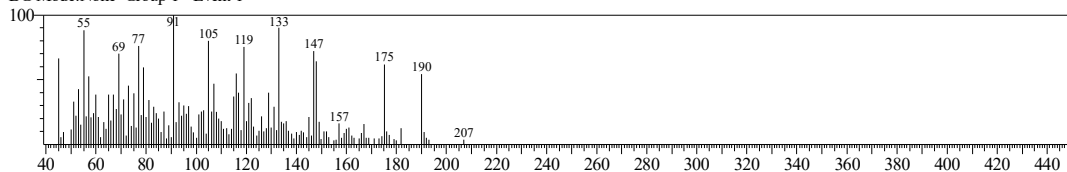

Hit#:1 Entry:37581 Library:NIST11.lib

SE:68 Formula:C<sub>13</sub>H<sub>18</sub>O CAS:38818-55-2 MolWeight:190 RetIndex:1454

CompName:Megastigmatrienone \$\$ 4-[(1E)-1,3-Butadienyl]-3,5,5-trimethyl-2-cyclohexen-1-one # \$\$

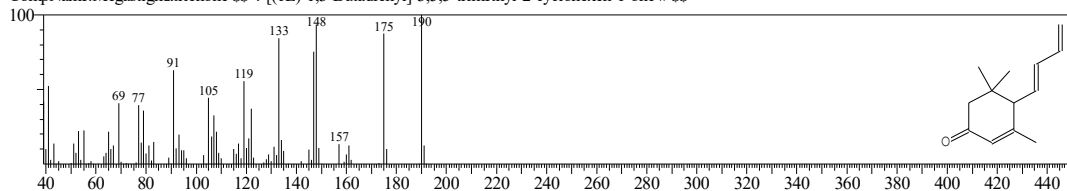

Hit#:2 Entry:21400 Library:NIST11.lib

SE:65 Formula:C<sub>12</sub>H<sub>18</sub> CAS:0-00-0 MolWeight:162 RetIndex:1052

CompName:2-(3,3-Dimethyl-but-1-ynyl)-1,1-dimethyl-3-methylene-cyclopropane \$\$ 2-(3,3-Dimethyl-1-butynyl)-1,1-dimethyl-3-methylenecyclopropane # \$\$

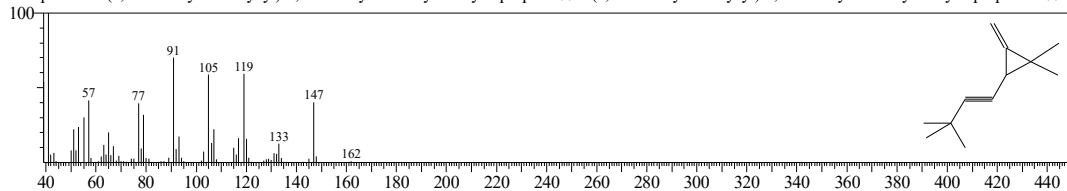

Hit#:3 Entry:21399 Library:NIST11.lib

SE:64 Formula:C<sub>12</sub>H<sub>18</sub> CAS:0-00-0 MolWeight:162 RetIndex:1052

CompName:1-(3,3-Dimethyl-but-1-ynyl)-1,2-dimethyl-3-methylene-cyclopropane \$\$ 1-(3,3-Dimethyl-1-butynyl)-1,2-dimethyl-3-methylenecyclopropane # \$\$

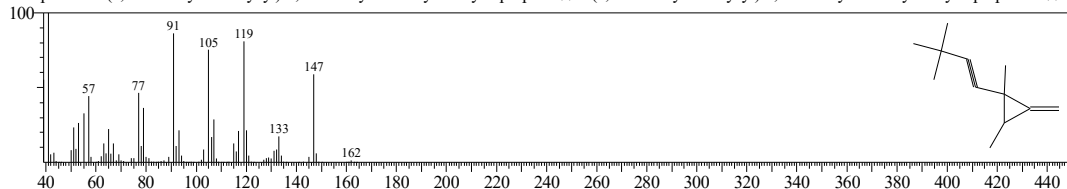

Hit#:4 Entry:70739 Library:NIST11.lib

SE:64 Formula:C<sub>15</sub>H<sub>26</sub>O<sub>2</sub> CAS:88588-48-1 MolWeight:238 RetIndex:1786

CompName:Cedran-diol, 8S,13- \$\$ Cedrane-8,13-diol # \$\$

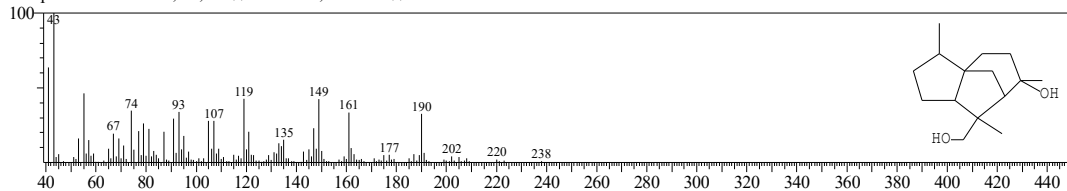

Hit#:5 Entry:131287 Library:NIST11.lib

SE:64 Formula:C<sub>21</sub>H<sub>32</sub>O<sub>2</sub> CAS:10178-35-5 MolWeight:316 RetIndex:2176

CompName:1-Naphthalenecarboxylic acid, decahydro-1,4a-dimethyl-6-methylene-5-(3-methyl-2,4-pentadienyl)-, methyl ester, [1S-[1.alpha.,4a.alpha.,5.alpha.(Z

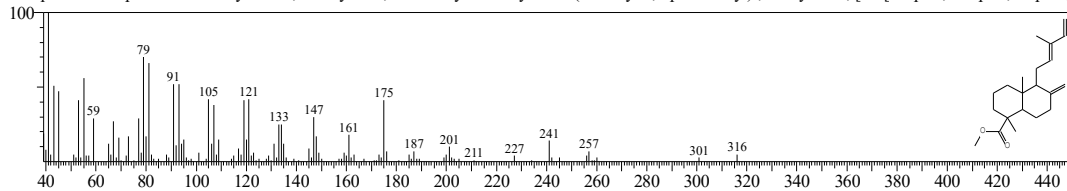

&lt;&lt; Target &gt;&gt;

Line#:25 R.Time:15.767(Scan#:1233) MassPeaks:142  
RawMode:Single 15.767(1233) BasePeak:108.00(567570)  
BG Mode:None Group 1 - Event 1

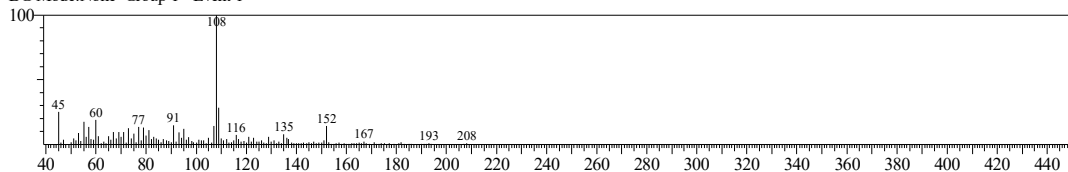

Hit#1 Entry:49452 Library:NIST11.lib

SE:78 Formula:C13H20O2 CAS:52210-15-8 MolWeight:208 RetIndex:1627

CompName:2-Cyclohexen-1-one, 4-(3-hydroxy-1-butenyl)-3,5,5-trimethyl-, [R-[R\*,R\*-(E)]]- \$S\$ 2-Cyclohexen-1-one, 4-[(1E,3R)-3-hydroxy-1-buten-1-yl]-3,5,

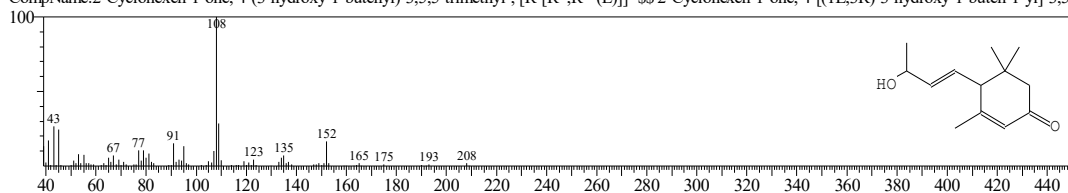

Hit#2 Entry:49451 Library:NIST11.lib

SE:74 Formula:C13H20O2 CAS:34318-21-3 MolWeight:208 RetIndex:1627

CompName:2-Cyclohexen-1-one, 4-(3-hydroxy-1-butenyl)-3,5,5-trimethyl- \$S\$ 3-Oxo-.alpha.-ionol \$S\$ 4-(3-Hydroxy-1-butenyl)-3,5,5-trimethyl-2-cyclohexen-1-

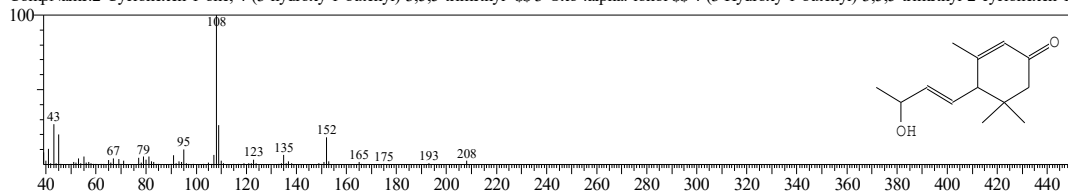

Hit#3 Entry:9560 Library:NIST11.lib

SE:73 Formula:C10H16O CAS:4501-58-0 MolWeight:152 RetIndex:1155

CompName:.alpha.-Campholenal \$S\$ (R)-.alpha.-Campholene aldehyde \$S\$ 3-Cyclopentene-1-acetaldehyde, 2,2,3-trimethyl- \$S\$ .alpha.-Campholene aldehyde \$S\$

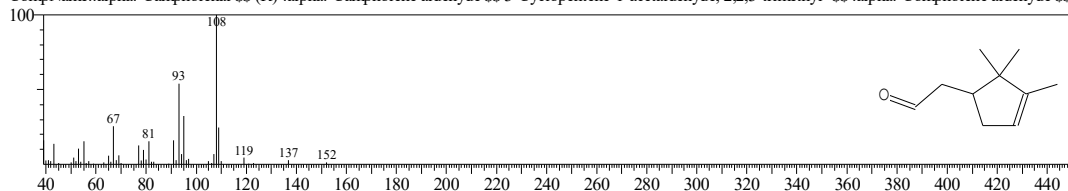

Hit#4 Entry:15539 Library:NIST11.lib

SE:71 Formula:C11H18 CAS:115948-98-6 MolWeight:150 RetIndex:1027

CompName:2,2-Dimethyl-3-vinyl-bicyclo[2.2.1]heptane

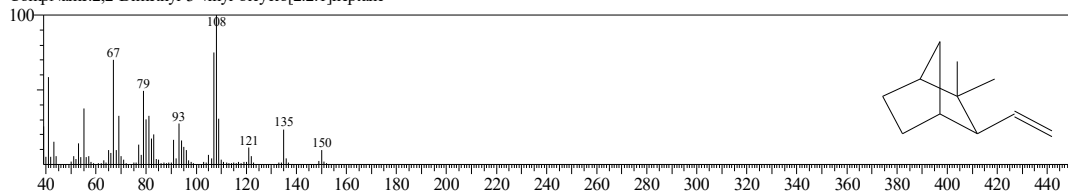

Hit#5 Entry:16472 Library:NIST11.lib

SE:71 Formula:C10H16O CAS:4501-58-0 MolWeight:152 RetIndex:1155

CompName:.alpha.-Campholenal \$S\$ (R)-.alpha.-Campholene aldehyde \$S\$ 3-Cyclopentene-1-acetaldehyde, 2,2,3-trimethyl- \$S\$ .alpha.-Campholene aldehyde \$S\$

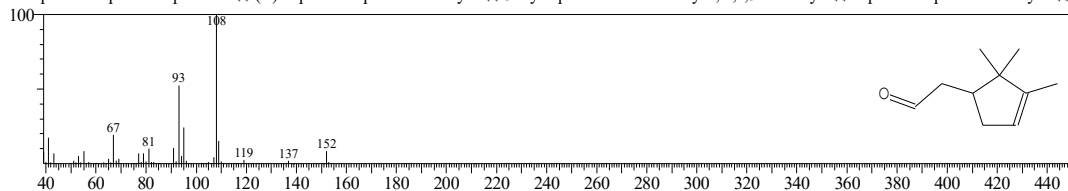

&lt;&lt; Target &gt;&gt;

Line#:26 R.Time:16.275(Scan#:1294) MassPeaks:147

RawMode:Single 16.275(1294) BasePeak:60.00(699999)

BG Mode:None Group 1 - Event 1

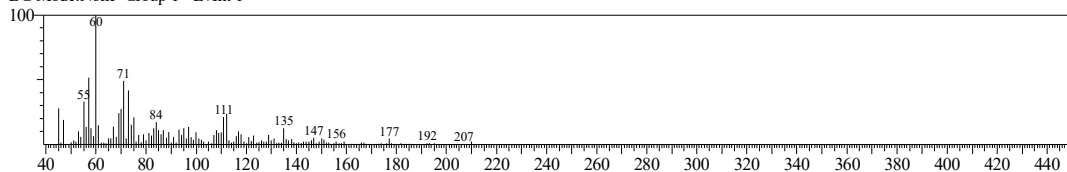

Hit#1 Entry:14323 Library:NIST11.lib

SI:75 Formula:C6H12O4 CAS:53585-08-3 MolWeight:148 RetIndex:1472

CompName:1,2,3,5-Cyclohexanetetrol, (1.alpha.,2.beta.,3.alpha.,5.beta.)- \$\$ 1,2,3,5-Cyclohexanetetrol # \$\$

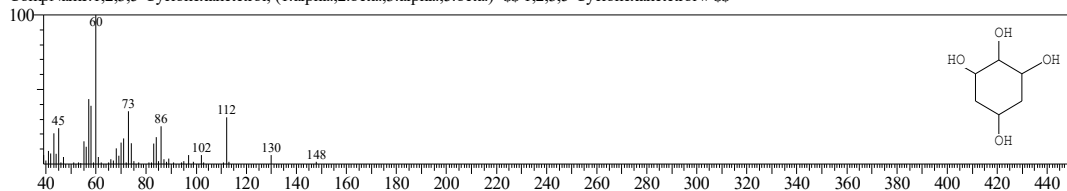

Hit#2 Entry:27150 Library:NIST11.lib

SI:74 Formula:C10H20S CAS:42779-08-8 MolWeight:172 RetIndex:1256

CompName:Octane, 1-(ethenylthio)- \$\$ 1-(Octylsulfanyl)ethylene # \$\$

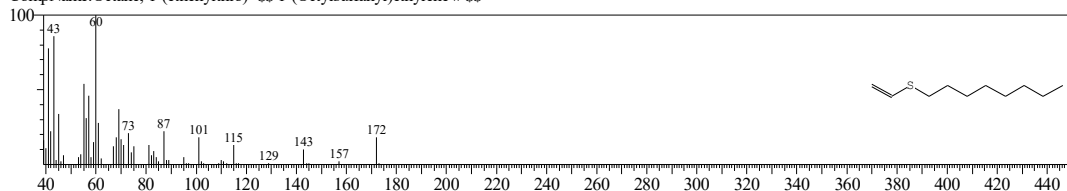

Hit#3 Entry:13090 Library:NIST11.lib

SI:73 Formula:C10H20O2 CAS:334-48-5 MolWeight:172 RetIndex:1372

CompName:n-Decanoic acid \$\$ Decanoic acid \$\$ n-Capric acid \$\$ n-Decoic acid \$\$ n-Decylic acid \$\$ Capric acid \$\$ Caprinic acid \$\$ Caprynic acid \$\$ Decoic

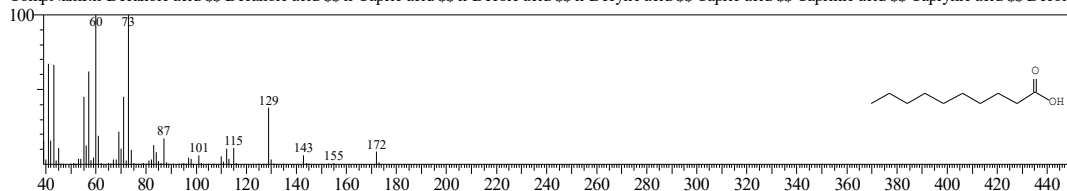

Hit#4 Entry:100625 Library:NIST11.lib

SI:73 Formula:C10H19AgO2 CAS:13126-67-5 MolWeight:278 RetIndex:0

CompName:Decanoic acid, silver(1+) salt \$\$ Silver decanoate \$\$

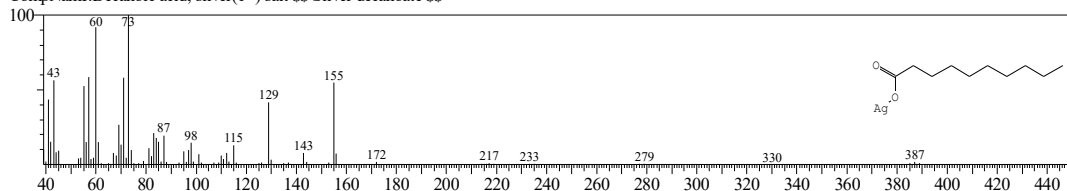

Hit#5 Entry:13091 Library:NIST11s.lib

SI:73 Formula:C10H20O2 CAS:334-48-5 MolWeight:172 RetIndex:1372

CompName:n-Decanoic acid \$\$ Decanoic acid \$\$ n-Capric acid \$\$ n-Decoic acid \$\$ n-Decylic acid \$\$ Capric acid \$\$ Caprinic acid \$\$ Caprynic acid \$\$ Decoic

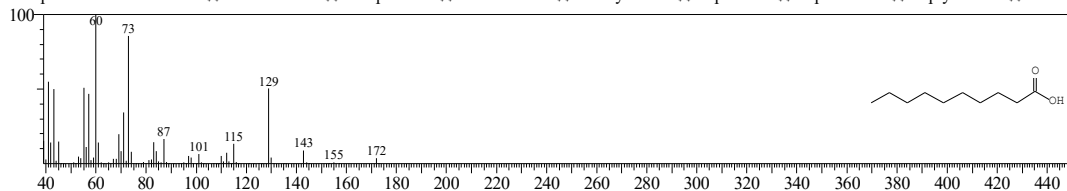

&lt;&lt; Target &gt;&gt;

Line#:27 R.Time:16.275(Scan#:1294) MassPeaks:147

RawMode:Single 16.275(1294) BasePeak:60.00(699999)

BG Mode:None Group 1 - Event 1

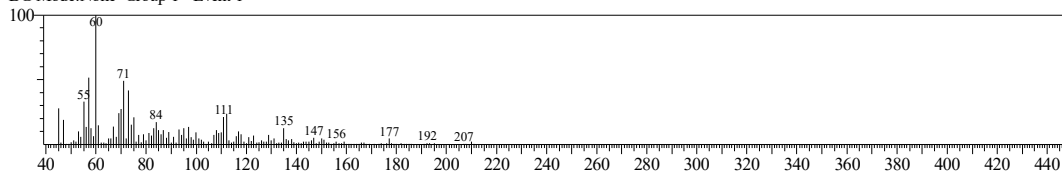

Hit#1 Entry:14323 Library:NIST11.lib

SI:75 Formula:C6H12O4 CAS:53585-08-3 MolWeight:148 RetIndex:1472

CompName:1,2,3,5-Cyclohexanetetrol, (1.alpha.,2.beta.,3.alpha.,5.beta.)- \$\$ 1,2,3,5-Cyclohexanetetrol # \$\$

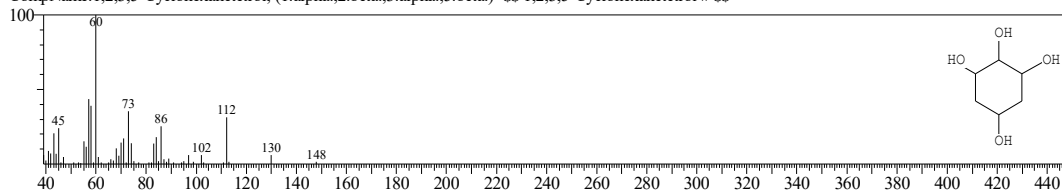

Hit#2 Entry:27150 Library:NIST11.lib

SI:74 Formula:C10H20S CAS:42779-08-8 MolWeight:172 RetIndex:1256

CompName:Octane, 1-(ethenylthio)- \$\$ 1-(Octylsulfanyl)ethylene # \$\$

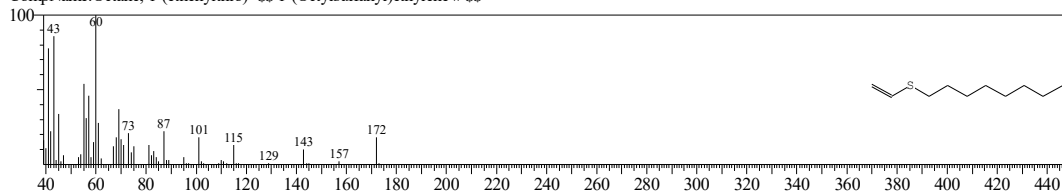

Hit#3 Entry:13090 Library:NIST11.lib

SI:73 Formula:C10H20O2 CAS:334-48-5 MolWeight:172 RetIndex:1372

CompName:n-Decanoic acid \$\$ Decanoic acid \$\$ n-Capric acid \$\$ n-Decoic acid \$\$ n-Decylic acid \$\$ Capric acid \$\$ Caprinic acid \$\$ Caprynic acid \$\$ Decoic

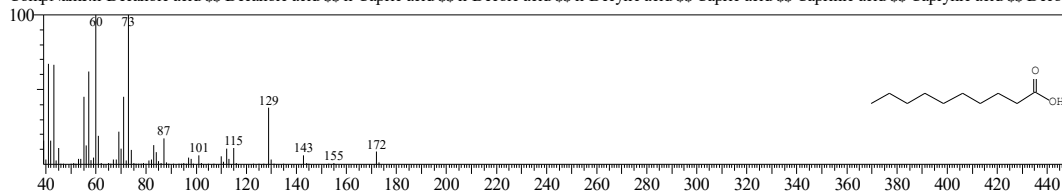

Hit#4 Entry:100625 Library:NIST11.lib

SI:73 Formula:C10H19AgO2 CAS:13126-67-5 MolWeight:278 RetIndex:0

CompName:Decanoic acid, silver(1+) salt \$\$ Silver decanoate \$\$

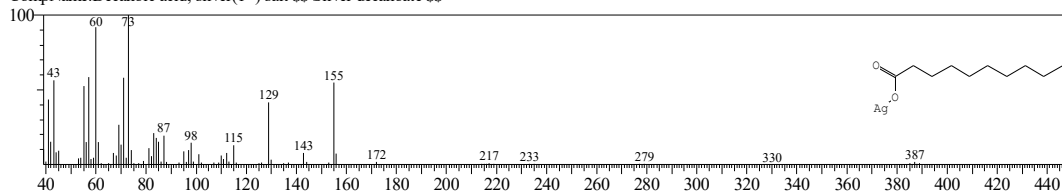

Hit#5 Entry:13091 Library:NIST11s.lib

SI:73 Formula:C10H20O2 CAS:334-48-5 MolWeight:172 RetIndex:1372

CompName:n-Decanoic acid \$\$ Decanoic acid \$\$ n-Capric acid \$\$ n-Decoic acid \$\$ n-Decylic acid \$\$ Capric acid \$\$ Caprinic acid \$\$ Caprynic acid \$\$ Decoic

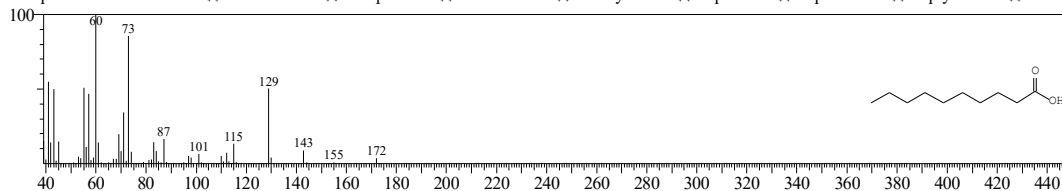

&lt;&lt; Target &gt;&gt;

Line#:28 R.Time:16.592(Scan#:1332) MassPeaks:148

RawMode:Single 16.592(1332) BasePeak:73.00(282847)

BG Mode:None Group 1 - Event 1

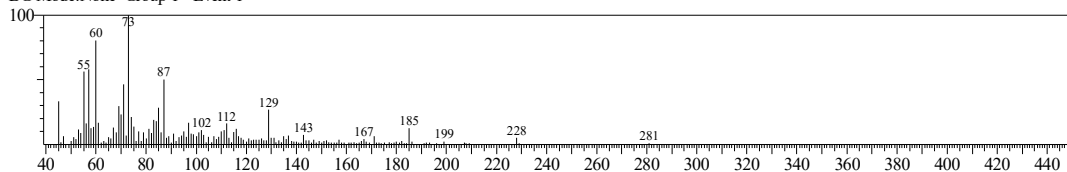

Hit#:1 Entry:53599 Library:NIST11.lib

SE:83 Formula:C13H26O2 CAS:638-53-9 MolWeight:214 RetIndex:1670

CompName:Tridecanoic acid \$\$ n-Tridecanoic acid \$\$ n-Tridecoic acid \$\$ Tridecylic acid \$\$

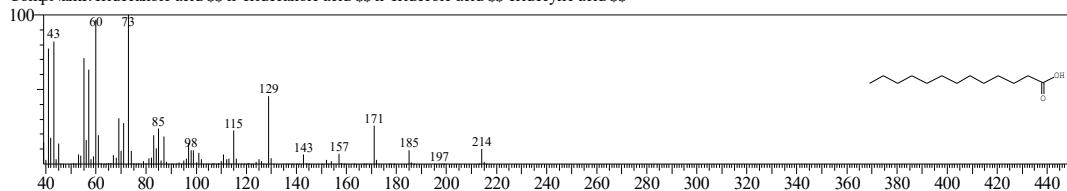

Hit#:2 Entry:100625 Library:NIST11.lib

SE:82 Formula:C10H19AgO2 CAS:13126-67-5 MolWeight:278 RetIndex:0

CompName:Decanoic acid, silver(1+) salt \$\$ Silver decanoate \$\$

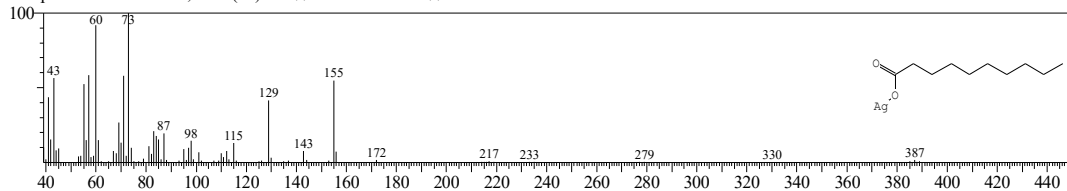

Hit#:3 Entry:73851 Library:NIST11.lib

SE:82 Formula:C15H30O2 CAS:1002-84-2 MolWeight:242 RetIndex:1869

CompName:Pentadecanoic acid \$\$ Pentadecylic acid \$\$ n-Pentadecanoic acid \$\$ n-Pentadecylic acid \$\$

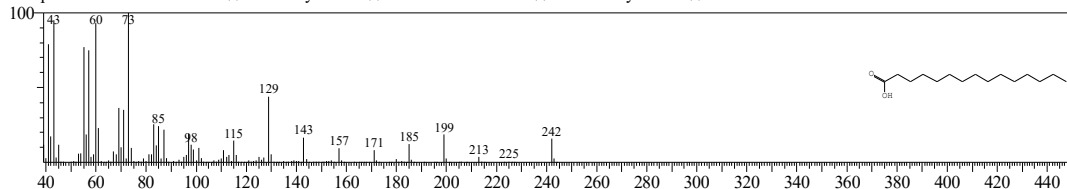

Hit#:4 Entry:63810 Library:NIST11.lib

SE:82 Formula:C14H28O2 CAS:544-63-8 MolWeight:228 RetIndex:1769

CompName:Tetradecanoic acid \$\$ Myristic acid \$\$ n-Tetradecanoic acid \$\$ n-Tetradecoic acid \$\$ Neo-Fat 14 \$\$ Univol U 316S \$\$ 1-Tridecanecarboxylic acid \$

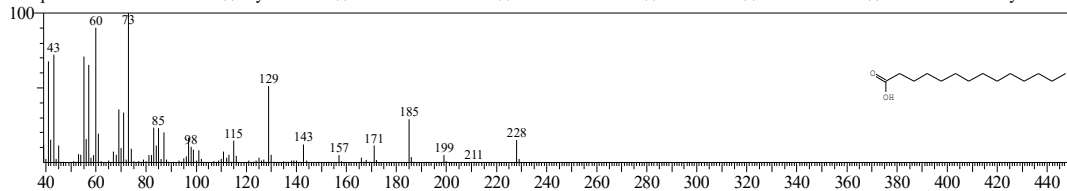

Hit#:5 Entry:19408 Library:NIST11s.lib

SE:82 Formula:C13H26O2 CAS:638-53-9 MolWeight:214 RetIndex:1670

CompName:Tridecanoic acid \$\$ n-Tridecanoic acid \$\$ n-Tridecoic acid \$\$ Tridecylic acid \$\$

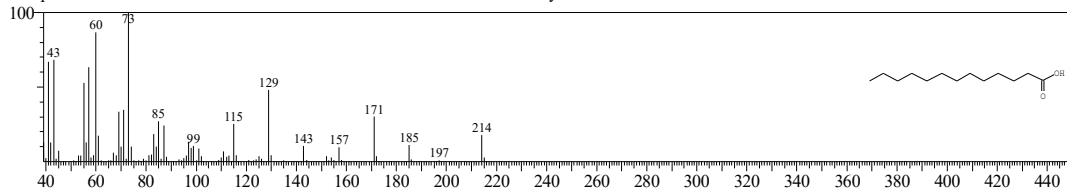

&lt;&lt; Target &gt;&gt;

Line#:29 R.Time:16.767(Scan#:1353) MassPeaks:154

RawMode:Single 16.767(1353) BasePeak:73.00(352554)

BG Mode:None Group 1 - Event 1

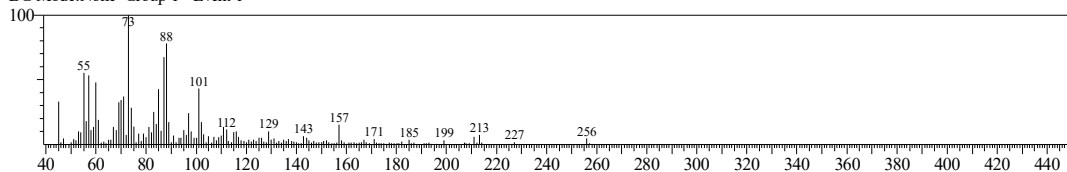

Hit#1 Entry:17521 Library:NIST11s.lib

SI:77 Formula:C12H24O2 CAS:143-07-7 MolWeight:200 RetIndex:1570

CompName:Dodecanoic acid \$\$ n-Dodecanoic acid \$\$ Neo-fat 12 \$\$ Aliphatic no. 4 \$\$ ABL \$\$ Dodecyl acid \$\$ Lauric acid \$\$ Laurostearic acid \$\$ Neo-fat 12-

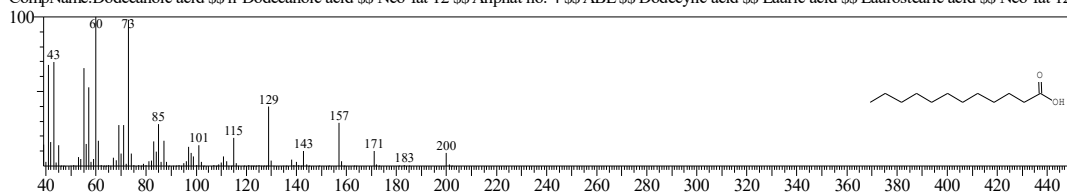

Hit#2 Entry:23313 Library:NIST11s.lib

SI:76 Formula:C16H32O2 CAS:57-10-3 MolWeight:256 RetIndex:1968

CompName:n-Hexadecanoic acid \$\$ Hexadecanoic acid \$\$ n-Hexadecanoic acid \$\$ Palmitic acid \$\$ Pentadecanecarboxylic acid \$\$ 1-Pentadecanecarboxylic acid

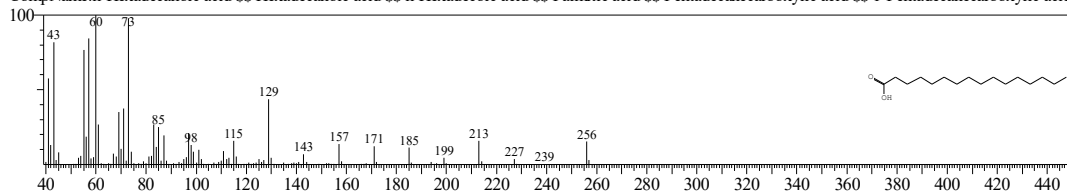

Hit#3 Entry:166830 Library:NIST11s.lib

SI:76 Formula:C24H48O2 CAS:5908-87-2 MolWeight:368 RetIndex:2574

CompName:Docosanoic acid, ethyl ester \$\$ Ethyl docosanoate # \$\$

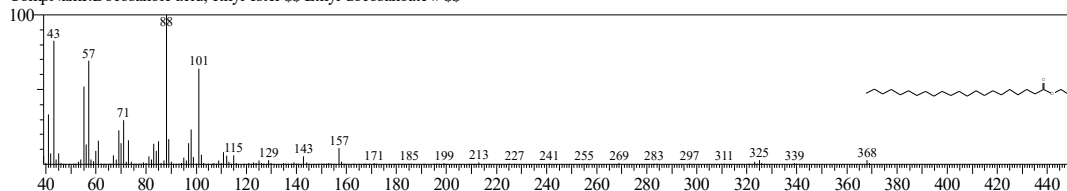

Hit#4 Entry:44009 Library:NIST11s.lib

SI:76 Formula:C12H24O2 CAS:143-07-7 MolWeight:200 RetIndex:1570

CompName:Dodecanoic acid \$\$ n-Dodecanoic acid \$\$ Neo-fat 12 \$\$ Aliphatic no. 4 \$\$ ABL \$\$ Dodecyl acid \$\$ Lauric acid \$\$ Laurostearic acid \$\$ Neo-fat 12-

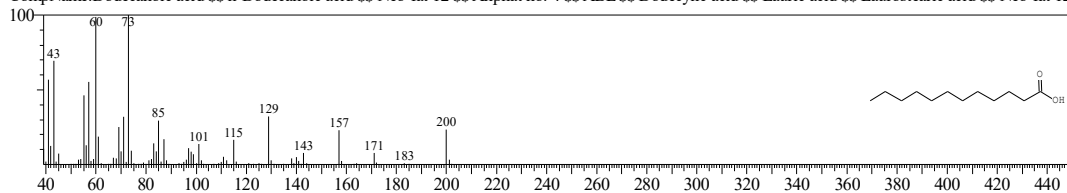

Hit#5 Entry:25180 Library:NIST11s.lib

SI:76 Formula:C18H36O2 CAS:628-97-7 MolWeight:284 RetIndex:1978

CompName:Hexadecanoic acid, ethyl ester \$\$ Palmitic acid, ethyl ester \$\$ Ethyl hexadecanoate \$\$ Ethyl palmitate \$\$ Ethyl n-hexadecanoate \$\$

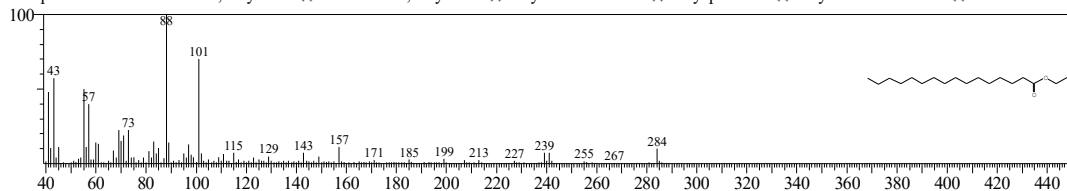

## &lt;&lt; Target &gt;&gt;

Line#:30 R.Time:16.908(Scan#:1370) MassPeaks:147

RawMode:Single 16.908(1370) BasePeak:73.00(357241)

BG Mode:None Group 1 - Event 1

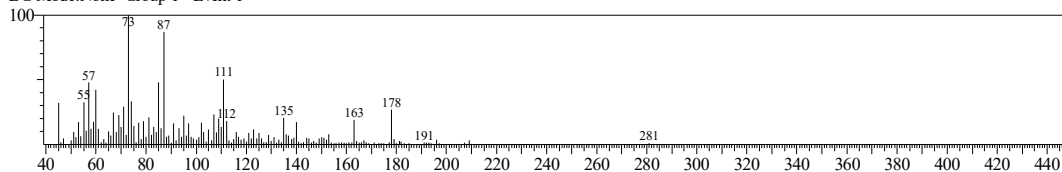

Hit#1 Entry:135733 Library:NIST11.lib

SE:69 Formula:C21H38O2 CAS:56687-68-4 MolWeight:322 RetIndex:2203

CompName:[1,1'-Bicyclopropyl]-2-octanoic acid, 2'-hexyl-, methyl ester

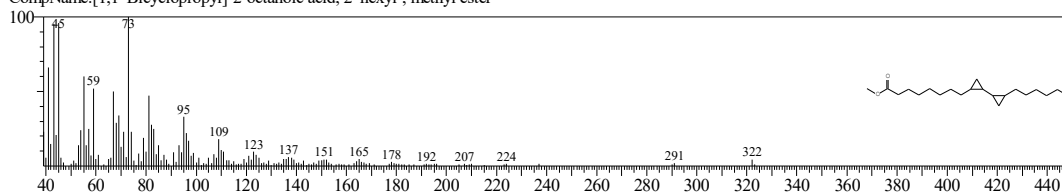

Hit#2 Entry:212076 Library:NIST11.lib

SE:68 Formula:C36H54O14 CAS:560-53-2 MolWeight:710 RetIndex:5558

CompName:Card-20(22)-enolide, 3-[(2,6-dideoxy-4-O-.beta.-D-glucopyranosyl-3-O-methyl-.beta.-D-ribo-hexopyranosyl)oxy]-5,14-dihydroxy-19-oxo-, (3.beta.

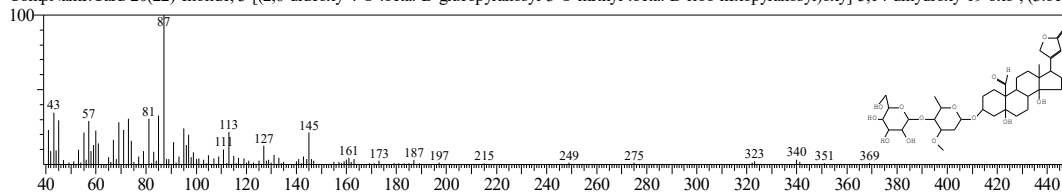

Hit#3 Entry:39438 Library:NIST11.lib

SE:66 Formula:C7H14O6 CAS:0-00-0 MolWeight:194 RetIndex:1647

CompName:3-O-Methyl-d-glucose 3-O-Methylhexose # 55

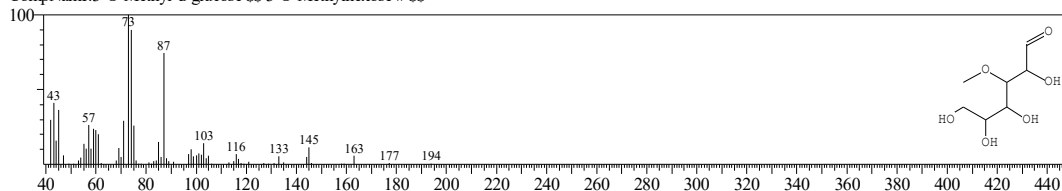

Hit#4 Entry:26685 Library:NIST11s.lib

SE:66 Formula:C19H34O3 CAS:40596-69-8 MolWeight:310 RetIndex:1933

CompName:Methoprene 55 2,4-Dodecadienoic acid, 11-methoxy-3,7,11-trimethyl-, 1-methylethyl ester, (E,E)- 55 Altosid 55 Altosid SR 10 55 Altoside 55 ENT

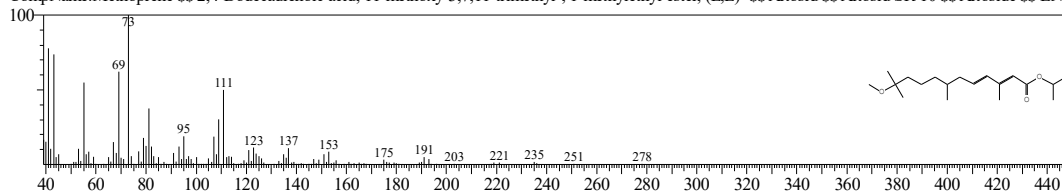

Hit#5 Entry:205078 Library:NIST11.lib

SE:66 Formula:C18H32O16 CAS:597-12-6 MolWeight:504 RetIndex:4506

CompName:alpha-D-Glucopyranoside, O-alpha-D-glucopyranosyl-(1.fwdarw.3)-.beta.-D-fructofuranosyl 55 Glucopyranoside, O-alpha-D-glucopyranosyl-(1

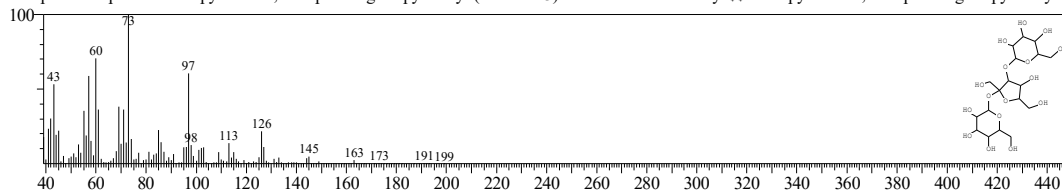

&lt;&lt; Target &gt;&gt;

Line#:31 R.Time:16.983(Scan#:1379) MassPeaks:149

RawMode:Single 16.983(1379) BasePeak:124.00(1320406)

BG Mode:None Group 1 - Event 1

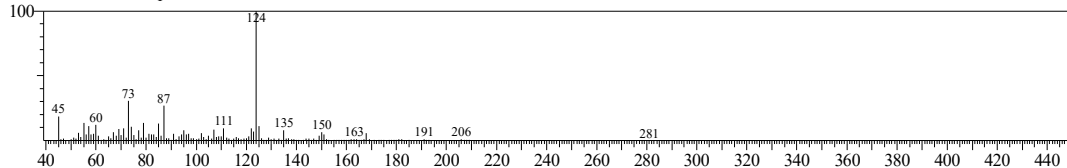

Hit#:1 Entry:107111 Library:NIST11.lib

SI:72 Formula:C13H18O5S CAS:0-00-0 MolWeight:286 RetIndex:2575

CompName:2-O-p-Methylphenyl-1-thio-.beta.-d-glucoside \$\$ 2-S-(4-Methylphenyl)-2-thiohexopyranose # \$\$

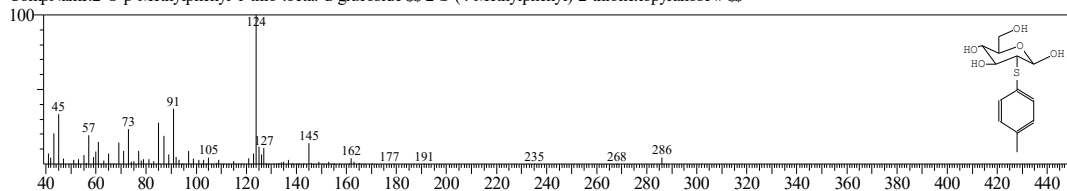

Hit#:2 Entry:107112 Library:NIST11.lib

SI:71 Formula:C13H18O5S CAS:0-00-0 MolWeight:286 RetIndex:2478

CompName:2-Methylphenyl-1-thio-.beta.-d-galactoside \$\$ 2-O-(4-Methylphenyl)-1-thiohexopyranose # \$\$

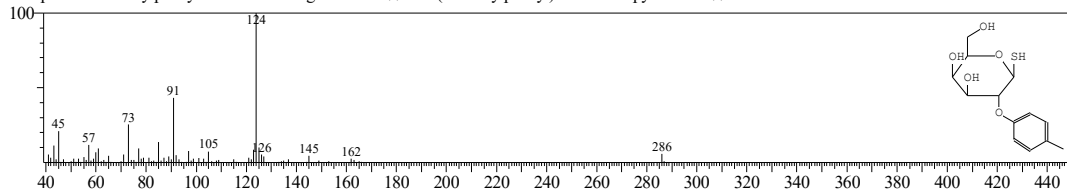

Hit#:3 Entry:107113 Library:NIST11.lib

SI:69 Formula:C13H18O5S CAS:0-00-0 MolWeight:286 RetIndex:2575

CompName:S-4-Methylphenyl-.beta.-D-glucoside \$\$ 4-Methylphenyl 1-thiohexopyranoside # \$\$

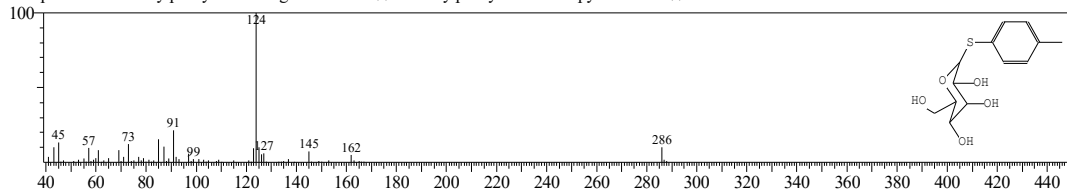

Hit#:4 Entry:72823 Library:NIST11.lib

SI:68 Formula:C13H23NO3 CAS:43224-65-3 MolWeight:241 RetIndex:1665

CompName:1-Acetyl-2,2,6,6-tetramethyl-4-acetyloxypiperidine \$\$ 1-Acetyl-2,2,6,6-tetramethyl-4-piperidinyol acetate # \$\$

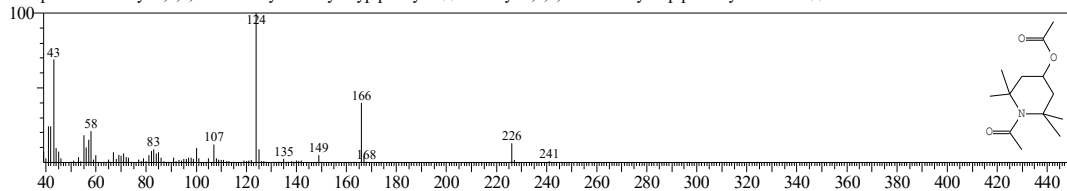

Hit#:5 Entry:33969 Library:NIST11.lib

SI:68 Formula:C11H20O2 CAS:22882-86-6 MolWeight:184 RetIndex:1415

CompName:4-Decenoic acid, 3-methyl-, (E)- \$\$ (4E)-3-Methyl-4-decenoic acid # \$\$

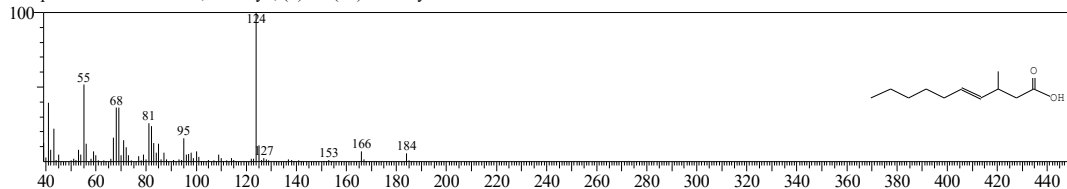



&lt;&lt; Target &gt;&gt;

Line#:32 R.Time:17.100(Scan#:1393) MassPeaks:149

RawMode:Single 17.100(1393) BasePeak:73.00(477374)

BG Mode:None Group 1 - Event 1

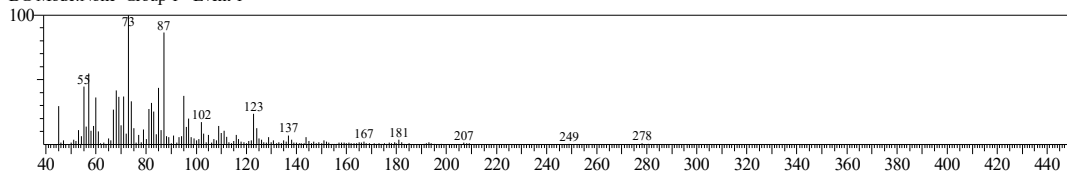

Hit#1 Entry:135733 Library:NIST11.lib

SE:81 Formula:C<sub>21</sub>H<sub>38</sub>O<sub>2</sub> CAS:56687-68-4 MolWeight:322 RetIndex:2203

CompName:[1,1'-Bicyclopropyl]-2-octanoic acid, 2'-hexyl-, methyl ester

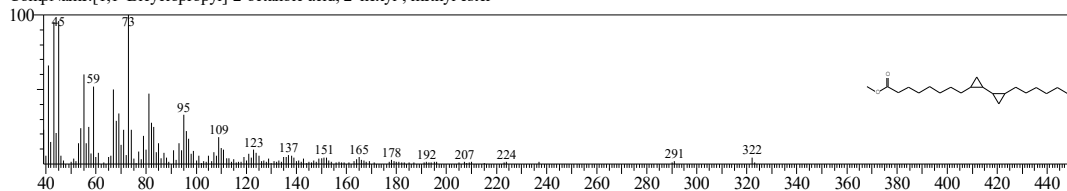

Hit#2 Entry:33864 Library:NIST11.lib

SE:75 Formula:C<sub>11</sub>H<sub>20</sub>O<sub>2</sub> CAS:4189-02-0 MolWeight:184 RetIndex:1479

CompName:2-Undecenoic acid \$\$ Undec-2-enoic acid \$\$

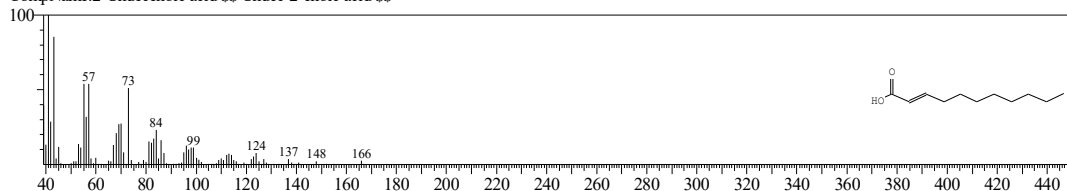

Hit#3 Entry:93487 Library:NIST11.lib

SE:75 Formula:C<sub>17</sub>H<sub>32</sub>O<sub>2</sub> CAS:0-00-0 MolWeight:268 RetIndex:1822

CompName:10-Methyl-E-11-tridecen-1-ol propionate \$\$ (11E)-10-Methyl-11-tridecenyl propionate # \$\$

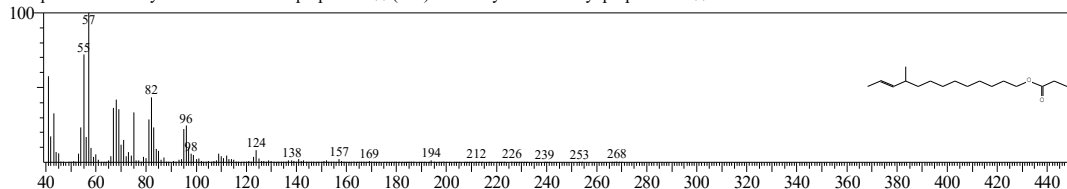

Hit#4 Entry:33865 Library:NIST11.lib

SE:75 Formula:C<sub>11</sub>H<sub>20</sub>O<sub>2</sub> CAS:15790-94-0 MolWeight:184 RetIndex:1479

CompName:trans-2-undecenoic acid \$\$ (2E)-2-Undecenoic acid # \$\$

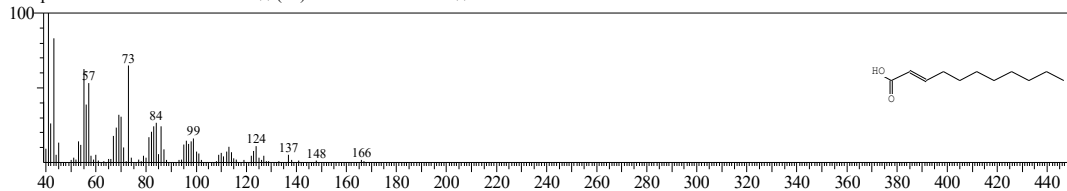

Hit#5 Entry:25037 Library:NIST11s.lib

SE:74 Formula:C<sub>18</sub>H<sub>34</sub>O<sub>2</sub> CAS:112-80-1 MolWeight:282 RetIndex:2175

CompName:Oleic Acid \$\$ 9-Octadecenoic acid (Z)- \$\$ .DELTA.9-cis-Oleic acid \$\$ cis-Oleic Acid \$\$ cis-9-Octadecenoic Acid \$\$ Emersol 211 \$\$ Emersol 220 V

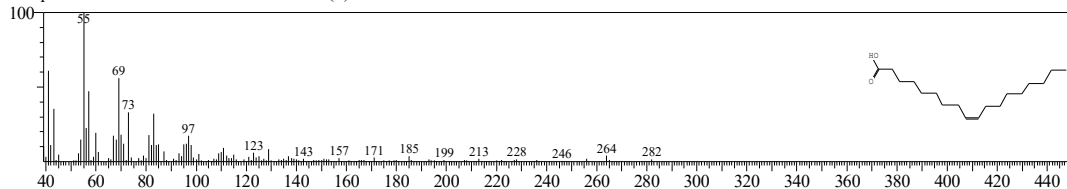

&lt;&lt; Target &gt;&gt;

Line#:33 R.Time:17.333(Scan#:1421) MassPeaks:156

RawMode:Single 17.333(1421) BasePeak:73.00(658908)

BG Mode:None Group 1 - Event 1

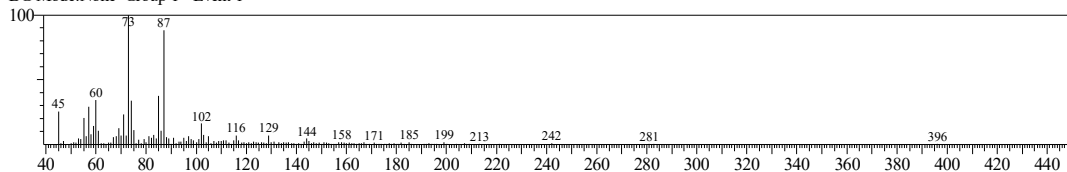

Hit#:1 Entry:39438 Library:NIST11.lib

SE:85 Formula:C7H14O6 CAS:0-00-0 MolWeight:194 RetIndex:1647

CompName:3-O-Methyl-d-glucose \$\$ 3-O-Methylhexose # \$\$

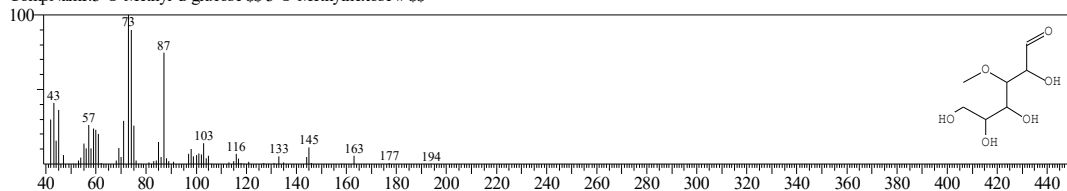

Hit#:2 Entry:39435 Library:NIST11.lib

SE:82 Formula:C7H14O6 CAS:0-00-0 MolWeight:194 RetIndex:1667

CompName:.alpha.-Methyl mannofuranoside \$\$ Methyl hexofuranoside # \$\$

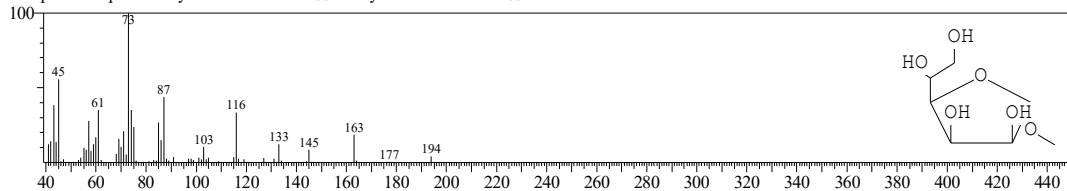

Hit#:3 Entry:14260 Library:NIST11.lib

SE:80 Formula:C6H12O6 CAS:3458-28-4 MolWeight:180 RetIndex:1698

CompName:d-Mannose \$\$ Mannose, d- \$\$ Carbinose \$\$ d(+)-Mannose \$\$ Mannose \$\$ Seminose \$\$ Hexose # \$\$

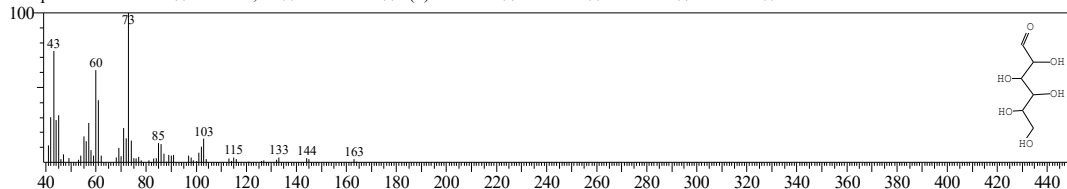

Hit#:4 Entry:39436 Library:NIST11.lib

SE:80 Formula:C7H14O6 CAS:4097-91-0 MolWeight:194 RetIndex:1667

CompName:.alpha.-d-Mannofuranoside, methyl \$\$ Methyl hexofuranoside # \$\$

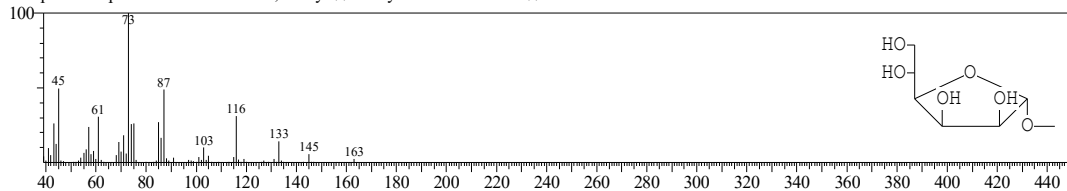

Hit#:5 Entry:142911 Library:NIST11.lib

SE:79 Formula:C17H32O6 CAS:0-00-0 MolWeight:332 RetIndex:2651

CompName:.beta.-D-Mannofuranoside, 1-O-(10-undecenyl)- \$\$ 10-Undecenyl hexofuranoside # \$\$

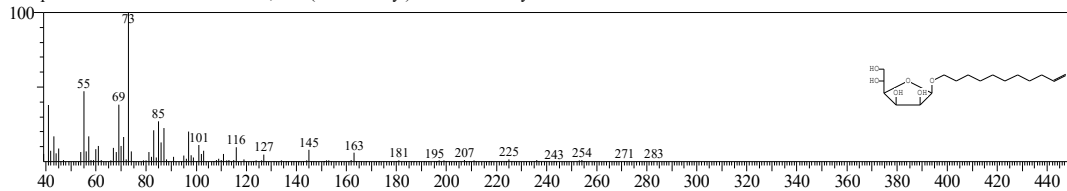

&lt;&lt; Target &gt;&gt;

Line#:34 R.Time:18.125(Scan#:1516) MassPeaks:200  
RawMode:Single 18.125(1516) BasePeak:73.00(1779060)  
BG Mode:None Group 1 - Event 1

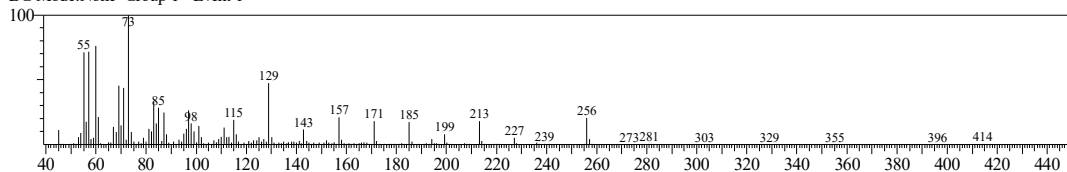

Hit#1 Entry:23313 Library:NIST11s.lib

SE:93 Formula:C16H32O2 CAS:57-10-3 MolWeight:256 RetIndex:1968

CompName:n-Hexadecanoic acid \$\$ Hexadecanoic acid \$\$ n-Hexadecanoic acid \$\$ Palmitic acid \$\$ Pentadecanecarboxylic acid \$\$ 1-Pentadecanecarboxylic acid

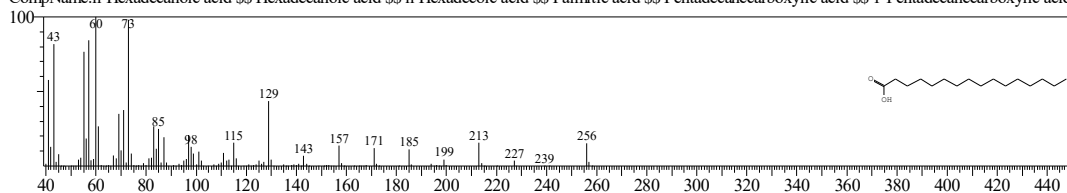

Hit#2 Entry:211367 Library:NIST11s.lib

SE:91 Formula:C38H80O8 CAS:28474-90-0 MolWeight:652 RetIndex:4765

CompName:l-(+)-Ascorbic acid 2,6-dihexadecanoate

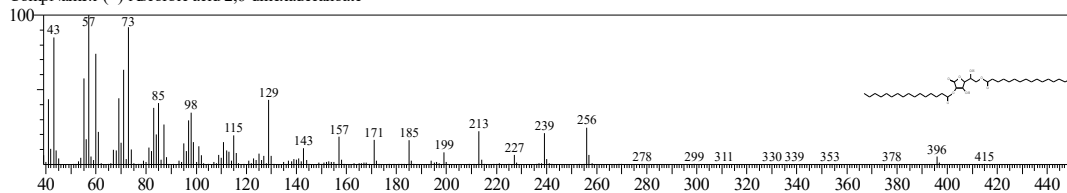

Hit#3 Entry:22188 Library:NIST11s.lib

SE:90 Formula:C15H30O2 CAS:1002-84-2 MolWeight:242 RetIndex:1869

CompName:Pentadecanoic acid \$\$ Pentadecylic acid \$\$ n-Pentadecanoic acid \$\$ n-Pentadecylic acid \$\$

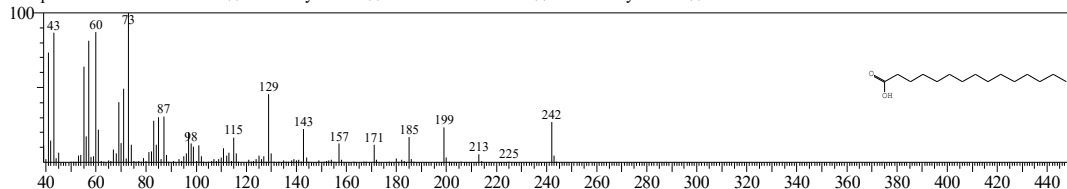

Hit#4 Entry:23305 Library:NIST11s.lib

SE:90 Formula:C16H32O2 CAS:57-10-3 MolWeight:256 RetIndex:1968

CompName:n-Hexadecanoic acid \$\$ Hexadecanoic acid \$\$ n-Hexadecanoic acid \$\$ Palmitic acid \$\$ Pentadecanecarboxylic acid \$\$ 1-Pentadecanecarboxylic acid

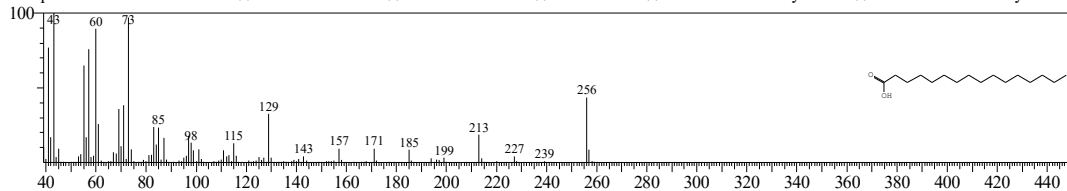

Hit#5 Entry:73851 Library:NIST11s.lib

SE:90 Formula:C15H30O2 CAS:1002-84-2 MolWeight:242 RetIndex:1869

CompName:Pentadecanoic acid \$\$ Pentadecylic acid \$\$ n-Pentadecanoic acid \$\$ n-Pentadecylic acid \$\$

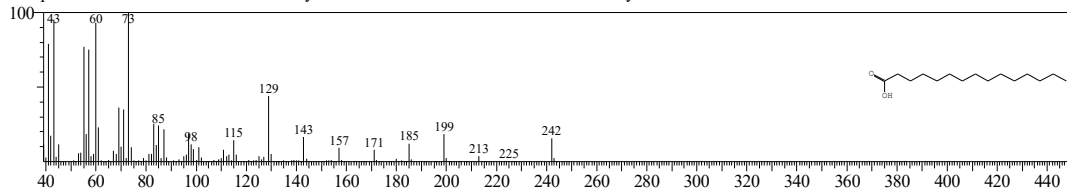

&lt;&lt; Target &gt;&gt;

Line#:35 R.Time:18.192(Scan#:1524) MassPeaks:192  
RawMode:Single 18.192(1524) BasePeak:88.00(4920052)  
BG Mode:None Group 1 - Event 1

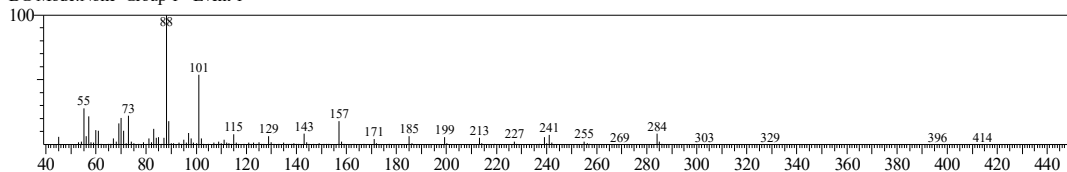

Hit#:1 Entry:106188 Library:NIST11.lib

SE:94 Formula:C18H36O2 CAS:628-97-7 MolWeight:284 RetIndex:1978

CompName:Hexadecanoic acid, ethyl ester \$\$ Palmitic acid, ethyl ester \$\$ Ethyl hexadecanoate \$\$ Ethyl palmitate \$\$ Ethyl n-hexadecanoate \$\$

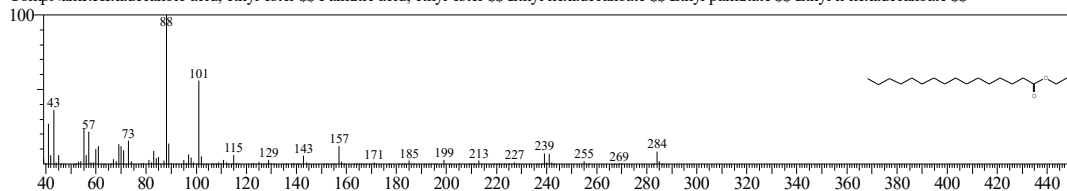

Hit#:2 Entry:95198 Library:NIST11.lib

SE:91 Formula:C17H34O2 CAS:0-00-0 MolWeight:270 RetIndex:1814

CompName:Ethyl 13-methyl-tetradecanoate

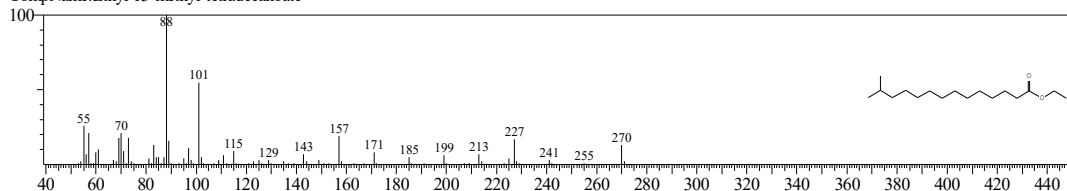

Hit#:3 Entry:25181 Library:NIST11.lib

SE:90 Formula:C18H36O2 CAS:628-97-7 MolWeight:284 RetIndex:1978

CompName:Hexadecanoic acid, ethyl ester \$\$ Palmitic acid, ethyl ester \$\$ Ethyl hexadecanoate \$\$ Ethyl palmitate \$\$ Ethyl n-hexadecanoate \$\$

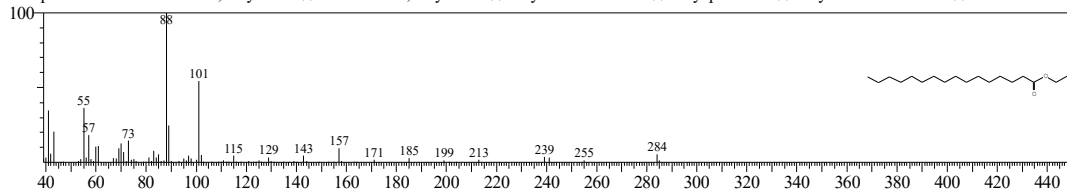

Hit#:4 Entry:95197 Library:NIST11.lib

SE:90 Formula:C17H34O2 CAS:41114-00-5 MolWeight:270 RetIndex:1878

CompName:Pentadecanoic acid, ethyl ester \$\$ Ethyl pentadecanoate \$\$ n-Pentadecanoic acid ethyl ester \$\$

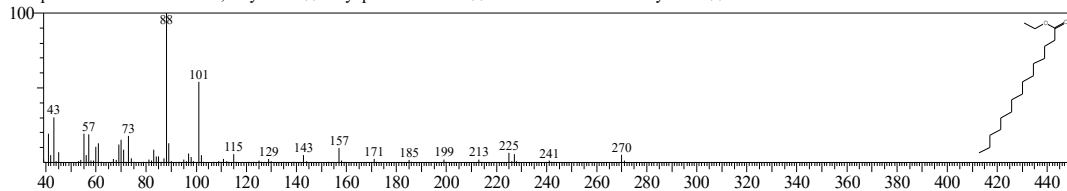

Hit#:5 Entry:26807 Library:NIST11.lib

SE:90 Formula:C20H40O2 CAS:111-61-5 MolWeight:312 RetIndex:2177

CompName:Octadecanoic acid, ethyl ester \$\$ Stearic acid, ethyl ester \$\$ Ethyl n-octadecanoate \$\$ Ethyl octadecanoate \$\$ Ethyl stearate \$\$ Radia 7185 \$\$

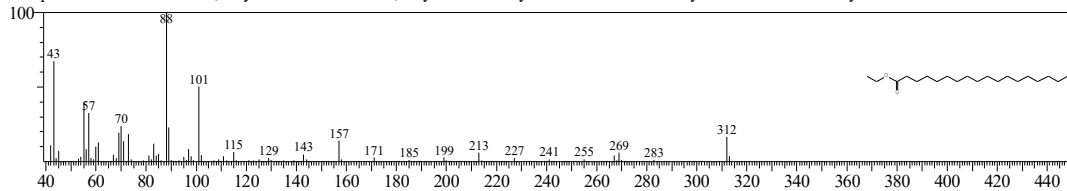

&lt;&lt; Target &gt;&gt;

Line#:36 R.Time:18.292(Scan#:1536) MassPeaks:207

RawMode:Single 18.292(1536) BasePeak:55.00(198759)

BG Mode:None Group 1 - Event 1

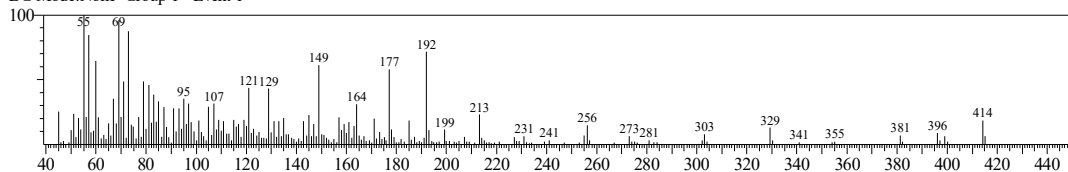

Hit#:1 Entry:29933 Library:NIST11s.lib

SE:63 Formula:C29H50O CAS:83-47-6 MolWeight:414 RetIndex:2731

CompName:.gamma.-Sitosterol \$\$ Stigmast-5-en-3-ol, (3.beta.,24S)- \$\$ Stigmast-5-en-3.beta.-ol, (24S)- \$\$ Clionasterol \$\$ Fucosterol, .beta.-dihydro- \$\$ 24.beta.

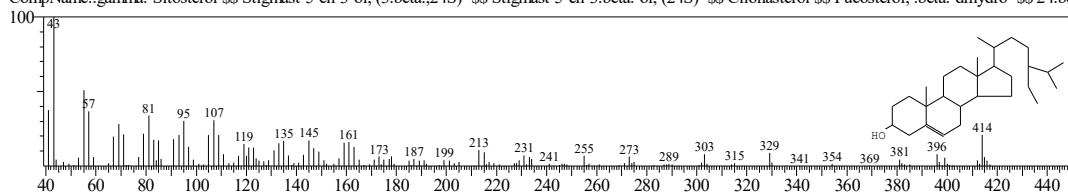

Hit#:2 Entry:187507 Library:NIST11s.lib

SE:62 Formula:C29H50O CAS:83-46-5 MolWeight:414 RetIndex:2731

CompName:.beta.-Sitosterol \$\$ Stigmast-5-en-3-ol, (3.beta.)- \$\$ Stigmast-5-en-3.beta.-ol \$\$ .alpha.-Dihydrofucosterol \$\$ .beta.-Sitosterin \$\$ Angelicin \$\$ Ange

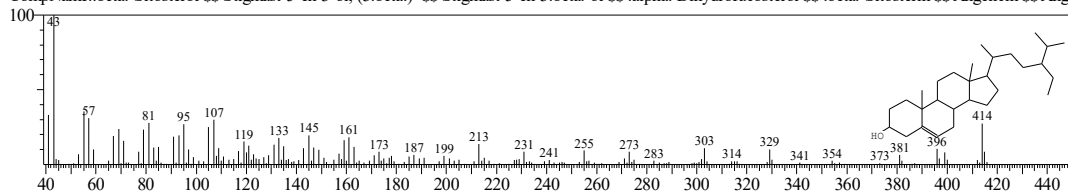

Hit#:3 Entry:29932 Library:NIST11s.lib

SE:62 Formula:C29H50O CAS:83-46-5 MolWeight:414 RetIndex:2731

CompName:.beta.-Sitosterol \$\$ Stigmast-5-en-3-ol, (3.beta.)- \$\$ Stigmast-5-en-3.beta.-ol \$\$ .alpha.-Dihydrofucosterol \$\$ .beta.-Sitosterin \$\$ Angelicin \$\$ Ange

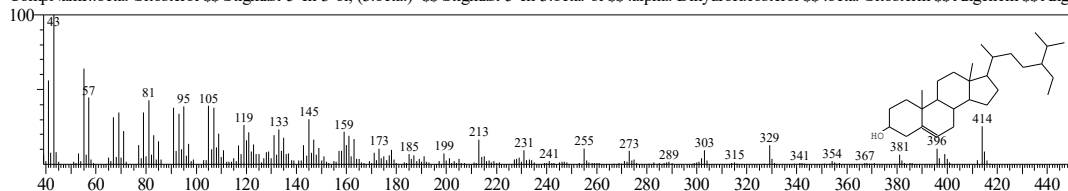

Hit#:4 Entry:187505 Library:NIST11s.lib

SE:61 Formula:C29H50O CAS:0-00-0 MolWeight:414 RetIndex:2703

CompName:Stigmastan-3-en-6-ol \$\$ Stigmast-3-en-6-ol # \$\$

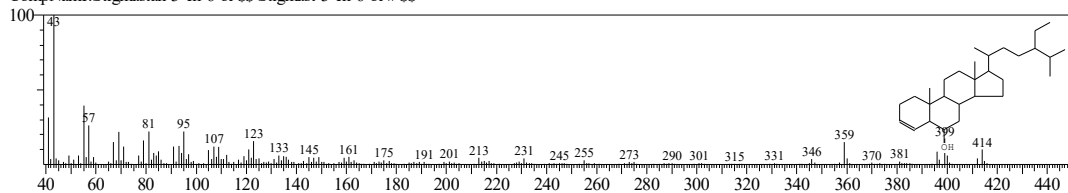

Hit#:5 Entry:187508 Library:NIST11s.lib

SE:60 Formula:C29H50O CAS:83-47-6 MolWeight:414 RetIndex:2731

CompName:.gamma.-Sitosterol \$\$ Stigmast-5-en-3-ol, (3.beta.,24S)- \$\$ Stigmast-5-en-3.beta.-ol, (24S)- \$\$ Clionasterol \$\$ Fucosterol, .beta.-dihydro- \$\$ 24.beta.

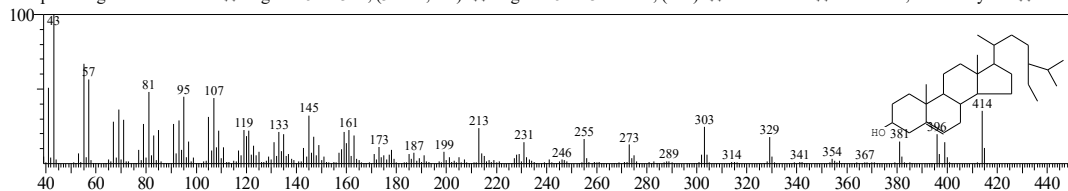

&lt;&lt; Target &gt;&gt;

Line#:37 R.Time:18.375(Scan#:1546) MassPeaks:215  
RawMode:Single 18.375(1546) BasePeak:55.00(180927)  
BG Mode:None Group 1 - Event 1

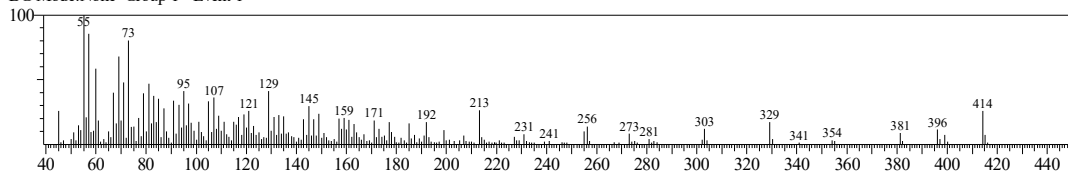

Hit#:1 Entry:29933 Library:NIST11s.lib

SE:73 Formula:C29H50O CAS:83-47-6 MolWeight:414 RetIndex:2731

CompName:.gamma.-Sitosterol \$\$ Stigmast-5-en-3-ol, (3.beta.,24S)- \$\$ Stigmast-5-en-3.beta.-ol, (24S)- \$\$ Clionasterol \$\$ Fucosterol, .beta.-dihydro- \$\$ 24.bet



Hit#:2 Entry:29932 Library:NIST11s.lib

SE:71 Formula:C29H50O CAS:83-46-5 MolWeight:414 RetIndex:2731

CompName:.beta.-Sitosterol \$\$ Stigmast-5-en-3-ol, (3.beta.)- \$\$ Stigmast-5-en-3.beta.-ol \$\$ .alpha.-Dihydrofucosterol \$\$ .beta.-Sitosterin \$\$ Angelicin \$\$ Ange

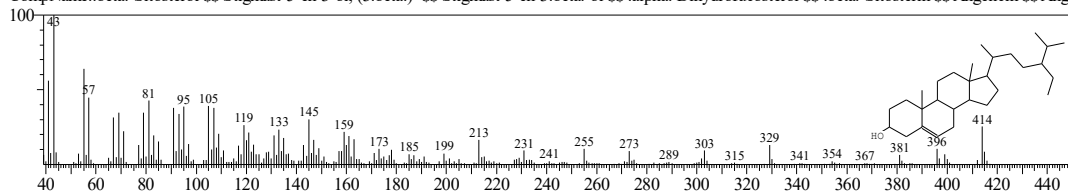

Hit#:3 Entry:187507 Library:NIST11s.lib

SE:70 Formula:C29H50O CAS:83-46-5 MolWeight:414 RetIndex:2731

CompName:.beta.-Sitosterol \$\$ Stigmast-5-en-3-ol, (3.beta.)- \$\$ Stigmast-5-en-3.beta.-ol \$\$ .alpha.-Dihydrofucosterol \$\$ .beta.-Sitosterin \$\$ Angelicin \$\$ Ange

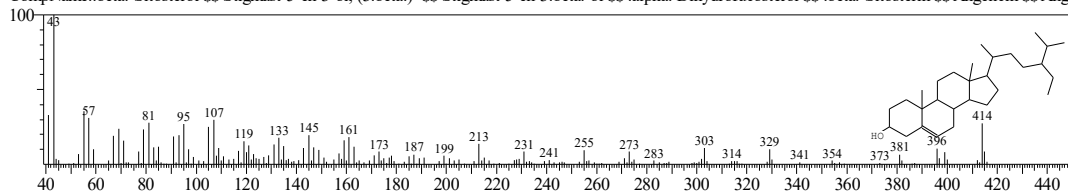

Hit#:4 Entry:187508 Library:NIST11s.lib

SE:69 Formula:C29H50O CAS:83-47-6 MolWeight:414 RetIndex:2731

CompName:.gamma.-Sitosterol \$\$ Stigmast-5-en-3-ol, (3.beta.,24S)- \$\$ Stigmast-5-en-3.beta.-ol, (24S)- \$\$ Clionasterol \$\$ Fucosterol, .beta.-dihydro- \$\$ 24.bet

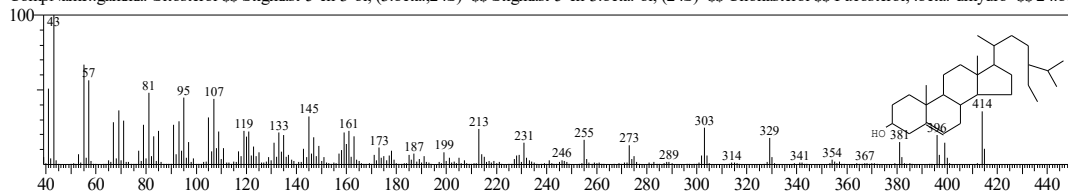

Hit#:5 Entry:187505 Library:NIST11s.lib

SE:65 Formula:C29H50O CAS:0-00-0 MolWeight:414 RetIndex:2703

CompName:Stigmastan-3-en-6-ol \$\$ Stigmast-3-en-6-ol # \$\$

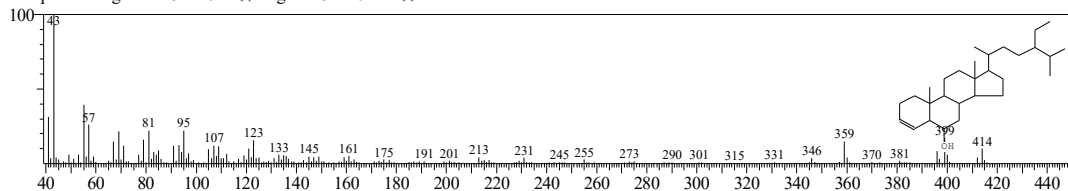

&lt;&lt; Target &gt;&gt;

Line#:38 R.Time:18.808(Scan#:1598) MassPeaks:190  
RawMode:Single 18.808(1598) BasePeak:88.00(191967)  
BG Mode:None Group 1 - Event 1

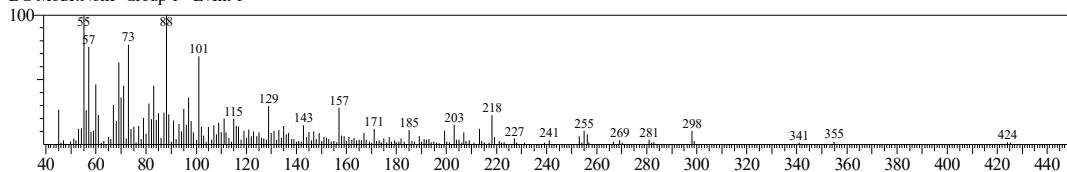

Hit#:1 Entry:51953 Library:NIST11.lib  
SI:76 Formula:C11H16O4 CAS:117132-08-8 MolWeight:212 RetIndex:1610  
CompName:9,9-Dimethoxybicyclo[3.3.1]nona-2,4-dione \$\$ 9,9-Dimethoxybicyclo[3.3.1]nona-2,4-dione # \$\$

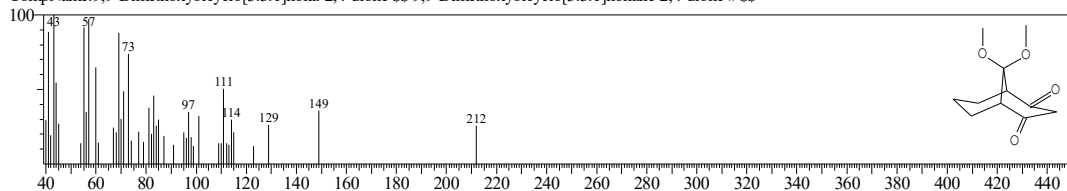

Hit#:2 Entry:117162 Library:NIST11.lib  
SI:76 Formula:C19H38O2 CAS:0-00-0 MolWeight:298 RetIndex:2013  
CompName:Ethyl 14-methyl-hexadecanoate

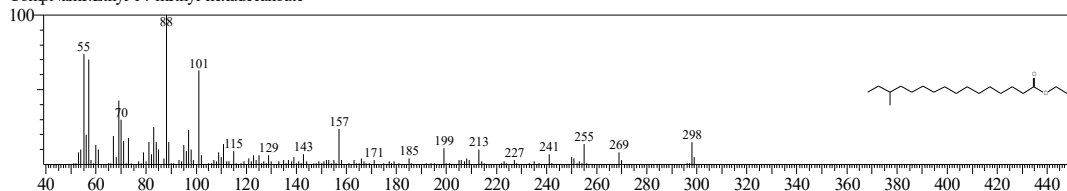

Hit#:3 Entry:43826 Library:NIST11.lib  
SI:75 Formula:C11H20O3 CAS:3433-16-7 MolWeight:200 RetIndex:1470  
CompName:Nonanoic acid, 9-oxo-, ethyl ester \$\$ Ethyl 9-oxononanoate # \$\$

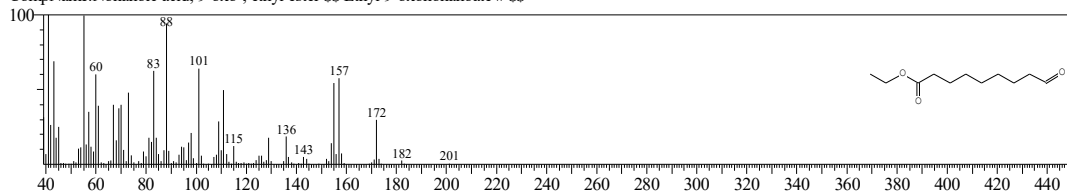

Hit#:4 Entry:128151 Library:NIST11.lib  
SI:74 Formula:C20H40O2 CAS:506-30-9 MolWeight:312 RetIndex:2366  
CompName:Eicosanoic acid \$\$ Arachic acid \$\$ Arachidic acid \$\$ Icosanoic acid \$\$ n-Eicosanoic acid \$\$ Arachidic acid (synthetic) \$\$

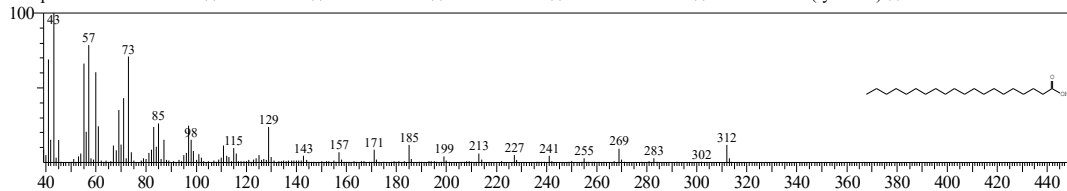

Hit#:5 Entry:42708 Library:NIST11.lib  
SI:74 Formula:C12H22O2 CAS:0-00-0 MolWeight:198 RetIndex:1407  
CompName:Propionic acid, 3-(2-methylcyclohexyl)-, ethyl ester \$\$ Ethyl 3-(2-methylcyclohexyl)propanoate # \$\$

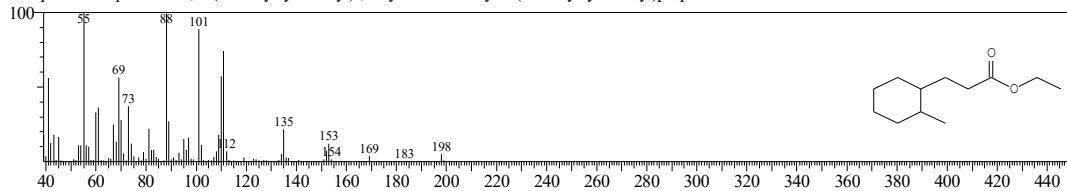

&lt;&lt; Target &gt;&gt;

Line#:39 R.Time:18.983(Scan#:1619) MassPeaks:191  
RawMode:Single 18.983(1619) BasePeak:71.00(6303335)  
BG Mode:None Group 1 - Event 1

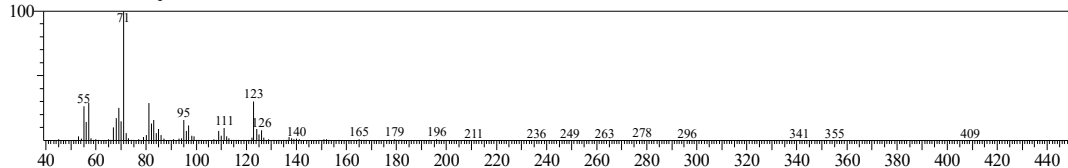

Hit#1 Entry:115516 Library:NIST11.lib

SE:97 Formula:C20H40O CAS:150-86-7 MolWeight:296 RetIndex:2045

CompName:Phytol \$\$ 2-Hexadecen-1-ol, 3,7,11,15-tetramethyl-, [R-[R\*,R\*-(E)]]- \$\$ trans-Phytol \$\$ 3,7,11,15-Tetramethyl-2-hexadecen-1-ol-, (2E,7R,11R)- \$

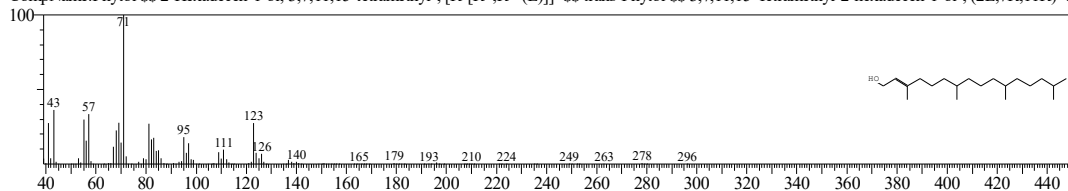

Hit#2 Entry:25943 Library:NIST11.lib

SE:95 Formula:C20H40O CAS:150-86-7 MolWeight:296 RetIndex:2045

CompName:Phytol \$\$ 2-Hexadecen-1-ol, 3,7,11,15-tetramethyl-, [R-[R\*,R\*-(E)]]- \$\$ trans-Phytol \$\$ 3,7,11,15-Tetramethyl-2-hexadecen-1-ol-, (2E,7R,11R)- \$

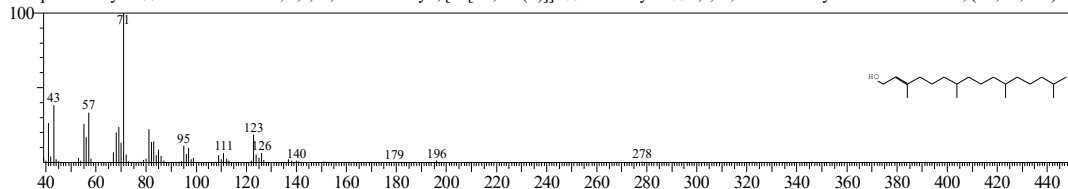

Hit#3 Entry:25942 Library:NIST11.lib

SE:95 Formula:C20H40O CAS:150-86-7 MolWeight:296 RetIndex:2045

CompName:Phytol \$\$ 2-Hexadecen-1-ol, 3,7,11,15-tetramethyl-, [R-[R\*,R\*-(E)]]- \$\$ trans-Phytol \$\$ 3,7,11,15-Tetramethyl-2-hexadecen-1-ol-, (2E,7R,11R)- \$

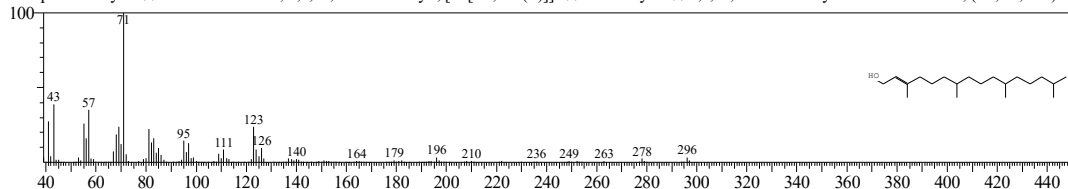

Hit#4 Entry:10360 Library:NIST11.lib

SE:87 Formula:C10H20O CAS:490-99-3 MolWeight:156 RetIndex:1164

CompName:Cyclohexanol, 5-methyl-2-(1-methylethyl)-, (1.alpha.,2.beta.,5.beta.)- \$\$ Menthol, trans-1,3,cis-1,4- \$\$ Isomenthol \$\$ Isomentol \$\$ 2-Isopropyl-5-n

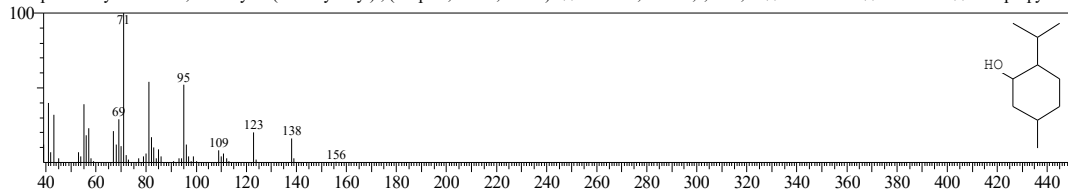

Hit#5 Entry:18670 Library:NIST11.lib

SE:86 Formula:C10H20O CAS:23283-97-8 MolWeight:156 RetIndex:1164

CompName:Cyclohexanol, 5-methyl-2-(1-methylethyl)-, [1S-(1.alpha.,2.beta.,5.beta.)]- \$\$ (1S,2R,5R)-(+)-Isomenthol \$\$ 2-Isopropyl-5-methylcyclohexanol # \$

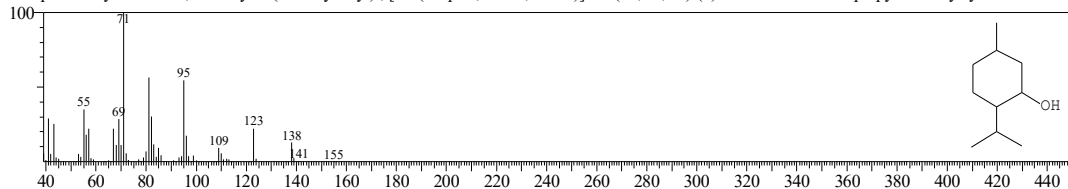



&lt;&lt; Target &gt;&gt;

Line#:40 R.Time:19.267(Scan#:1653) MassPeaks:223  
RawMode:Single 19.267(1653) BasePeak:67.00(1478470)  
BG Mode:None Group 1 - Event 1

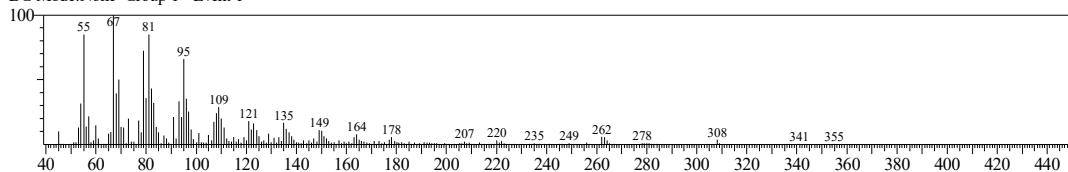

Hit#1 Entry:144979 Library:NIST11.lib

SE:90 Formula:C22H38O2 CAS:10152-71-3 MolWeight:334 RetIndex:2266

CompName:Cyclopropanooctanoic acid, 2-[[2-(2-ethylcyclopropyl)methyl]cyclopropyl]methyl]-, methyl ester \$Methyl 8-[2-(2-(2-ethylcyclopropyl)methyl)]c

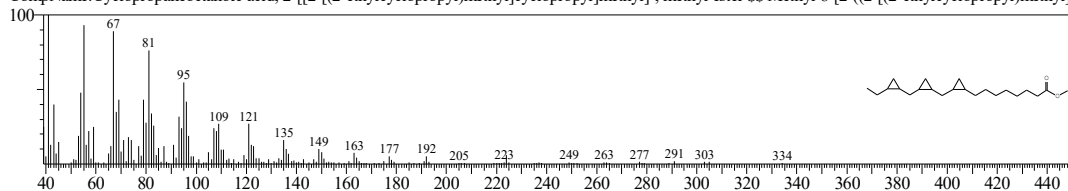

Hit#2 Entry:24902 Library:NIST11.lib

SE:89 Formula:C18H32O2 CAS:60-33-3 MolWeight:280 RetIndex:2183

CompName:9,12-Octadecadienoic acid (Z,Z)- \$cis-9,cis-12-Octadecadienoic acid \$cis,cis-Linoleic acid \$Grape seed oil \$Linoleic \$Linoleic acid \$Li

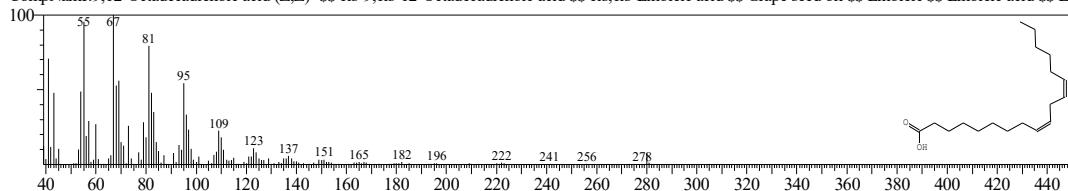

Hit#3 Entry:126507 Library:NIST11.lib

SE:89 Formula:C20H38O2 CAS:17367-08-7 MolWeight:310 RetIndex:2344

CompName:Ethanol, 2-(9,12-octadecadienyloxy)-, (Z,Z)- \$2-cis,cis-9,12-Octadecadienyloxyethanol \$2-[(9Z,12Z)-9,12-Octadecadienyloxy]ethanol # \$

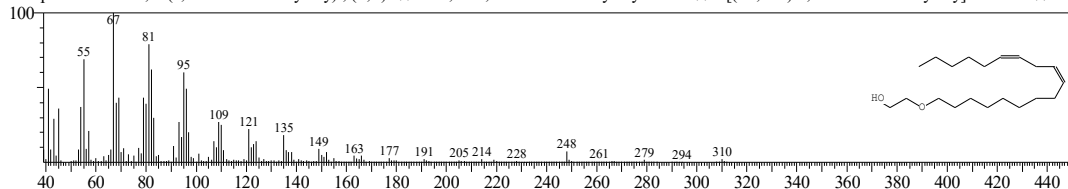

Hit#4 Entry:81324 Library:NIST11.lib

SE:89 Formula:C17H32O CAS:64566-18-3 MolWeight:252 RetIndex:1907

CompName:(R)-(-)-14-Methyl-8-hexadecyn-1-ol \$14-Methyl-8-hexadecyn-1-ol # \$

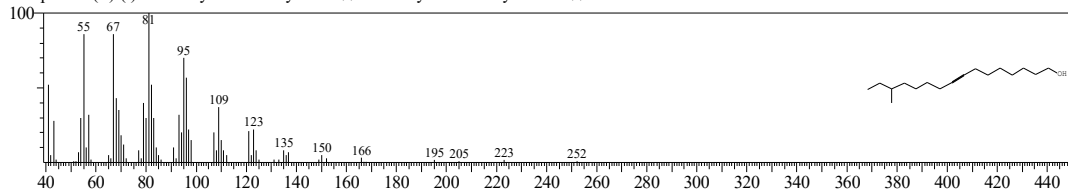

Hit#5 Entry:24903 Library:NIST11.lib

SE:88 Formula:C18H32O2 CAS:60-33-3 MolWeight:280 RetIndex:2183

CompName:9,12-Octadecadienoic acid (Z,Z)- \$cis-9,cis-12-Octadecadienoic acid \$cis,cis-Linoleic acid \$Grape seed oil \$Linoleic \$Linoleic acid \$Li

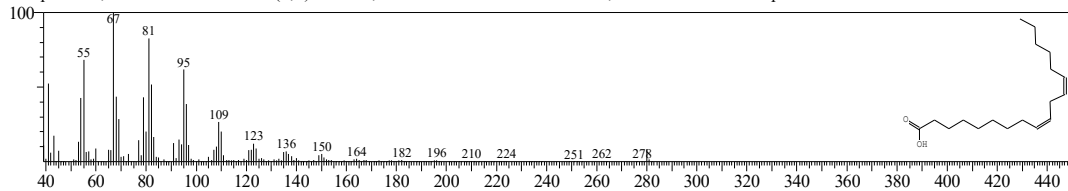

&lt;&lt; Target &gt;&gt;

Line#:41 R.Time:19.317(Scan#:1659) MassPeaks:225  
RawMode:Single 19.317(1659) BasePeak:55.00(1747105)  
BG Mode:None Group 1 - Event 1

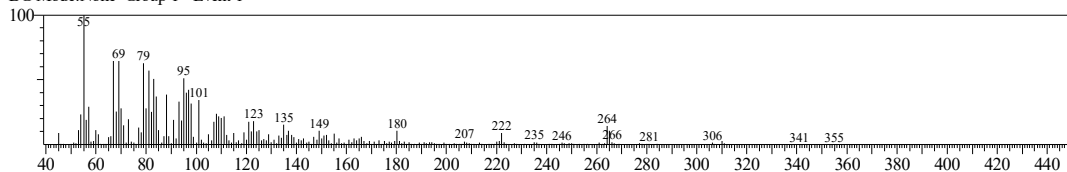

Hit#1 Entry:26691 Library:NIST11s.lib

SE:82 Formula:C20H38O2 CAS:111-62-6 MolWeight:310 RetIndex:2185

CompName:Ethyl Oleate \$\$ 9-Octadecenoic acid (Z)-, ethyl ester \$\$ Oleic acid, ethyl ester \$\$ (Z)-9-Octadecenoic acid ethyl ester \$\$ Ethyl cis-9-octadecenoate :

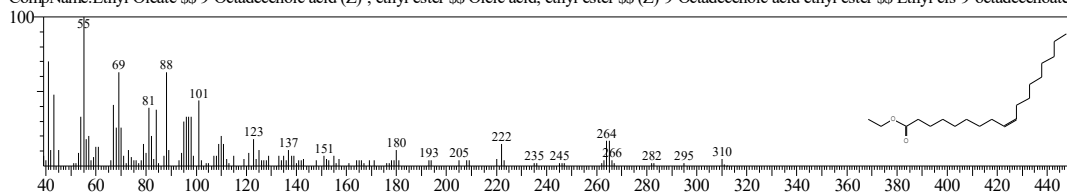

Hit#2 Entry:26694 Library:NIST11s.lib

SE:81 Formula:C20H38O2 CAS:111-62-6 MolWeight:310 RetIndex:2185

CompName:Ethyl Oleate \$\$ 9-Octadecenoic acid (Z)-, ethyl ester \$\$ Oleic acid, ethyl ester \$\$ (Z)-9-Octadecenoic acid ethyl ester \$\$ Ethyl cis-9-octadecenoate :

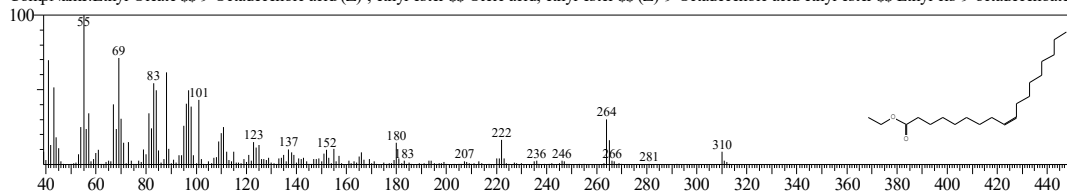

Hit#3 Entry:126491 Library:NIST11s.lib

SE:81 Formula:C20H38O2 CAS:6114-18-7 MolWeight:310 RetIndex:2185

CompName:(E)-9-Octadecenoic acid ethyl ester \$\$ 9-Octadecenoic acid, ethyl ester, (E)- \$\$ Ethyl 9-octadecenoate, (E)- \$\$ Ethyl (9E)-9-octadecenoate \$\$ Elaidi

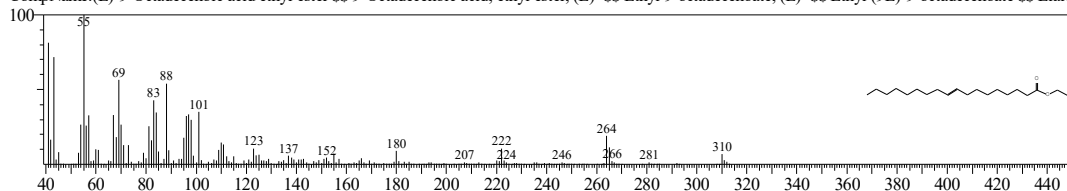

Hit#4 Entry:26693 Library:NIST11s.lib

SE:80 Formula:C20H38O2 CAS:111-62-6 MolWeight:310 RetIndex:2185

CompName:Ethyl Oleate \$\$ 9-Octadecenoic acid (Z)-, ethyl ester \$\$ Oleic acid, ethyl ester \$\$ (Z)-9-Octadecenoic acid ethyl ester \$\$ Ethyl cis-9-octadecenoate :

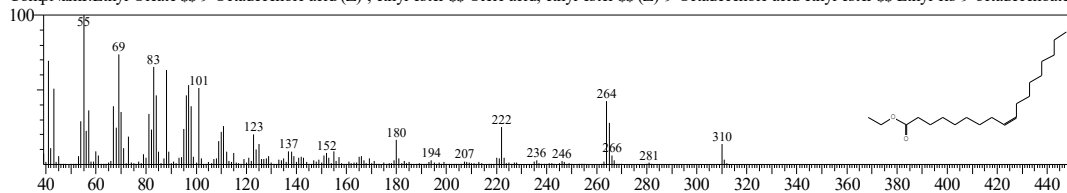

Hit#5 Entry:159418 Library:NIST11s.lib

SE:80 Formula:C21H40O4 CAS:3443-84-3 MolWeight:356 RetIndex:2705

CompName:9-Octadecenoic acid (Z)-, 2-hydroxy-1-(hydroxymethyl)ethyl ester \$\$ Olein, 2-mono- \$\$ .beta.-Monoolein \$\$ Glycerol 2-monooleate \$\$ 2-Monoole

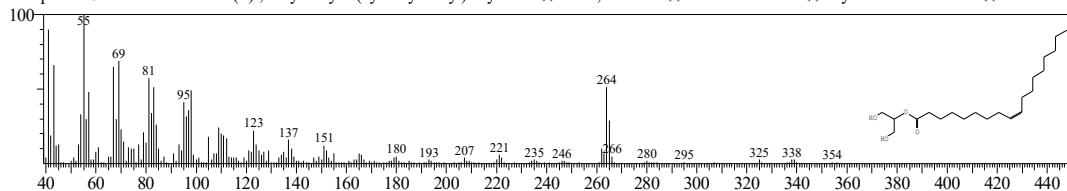

&lt;&lt; Target &gt;&gt;

Line#:42 R.Time:19.442(Scan#:1674) MassPeaks:212  
RawMode:Single 19.442(1674) BasePeak:88.00(2287434)  
BG Mode:None Group 1 - Event 1

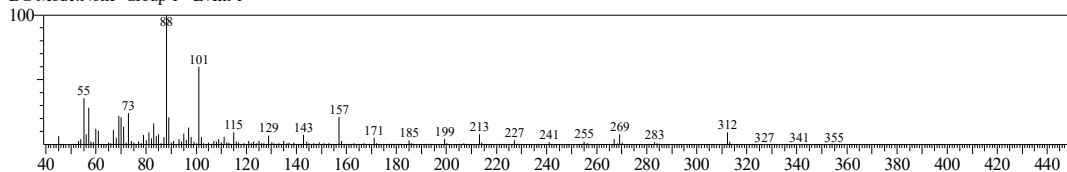

Hit#1 Entry:26807 Library:NIST11s.lib

SE:90 Formula:C20H40O2 CAS:111-61-5 MolWeight:312 RetIndex:2177

CompName:Octadecanoic acid, ethyl ester \$\$ Stearic acid, ethyl ester \$\$ Ethyl n-octadecanoate \$\$ Ethyl octadecanoate \$\$ Ethyl stearate \$\$ Radia 7185 \$\$

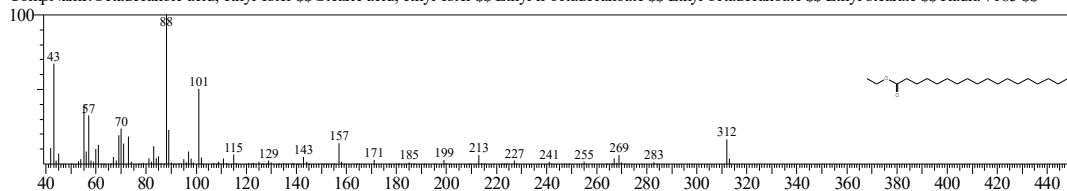

Hit#2 Entry:26809 Library:NIST11s.lib

SE:88 Formula:C20H40O2 CAS:111-61-5 MolWeight:312 RetIndex:2177

CompName:Octadecanoic acid, ethyl ester \$\$ Stearic acid, ethyl ester \$\$ Ethyl n-octadecanoate \$\$ Ethyl octadecanoate \$\$ Ethyl stearate \$\$ Radia 7185 \$\$

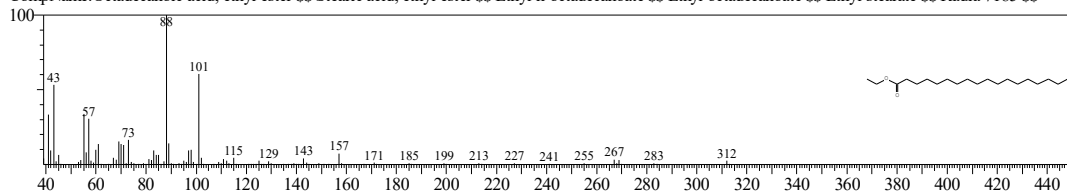

Hit#3 Entry:26811 Library:NIST11s.lib

SE:88 Formula:C20H40O2 CAS:55124-97-5 MolWeight:312 RetIndex:2112

CompName:Octadecanoic acid, 17-methyl-, methyl ester \$\$ Methyl 17-methyloctadecanoate # \$\$

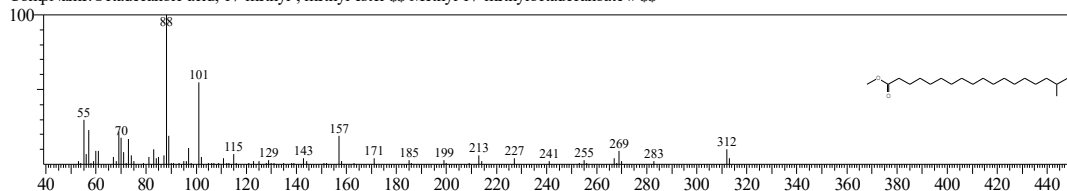

Hit#4 Entry:117164 Library:NIST11s.lib

SE:87 Formula:C19H38O2 CAS:0-00-0 MolWeight:298 RetIndex:2013

CompName:Ethyl 15-methyl-hexadecanoate

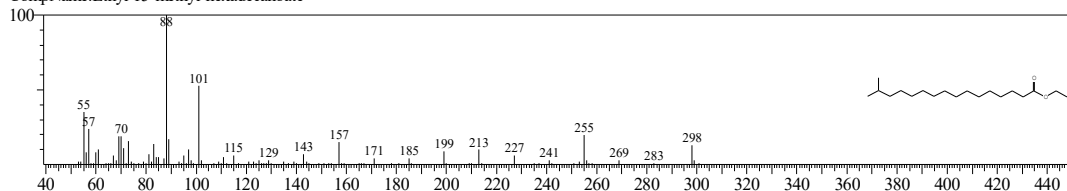

Hit#5 Entry:26810 Library:NIST11s.lib

SE:87 Formula:C20H40O2 CAS:111-61-5 MolWeight:312 RetIndex:2177

CompName:Octadecanoic acid, ethyl ester \$\$ Stearic acid, ethyl ester \$\$ Ethyl n-octadecanoate \$\$ Ethyl octadecanoate \$\$ Ethyl stearate \$\$ Radia 7185 \$\$

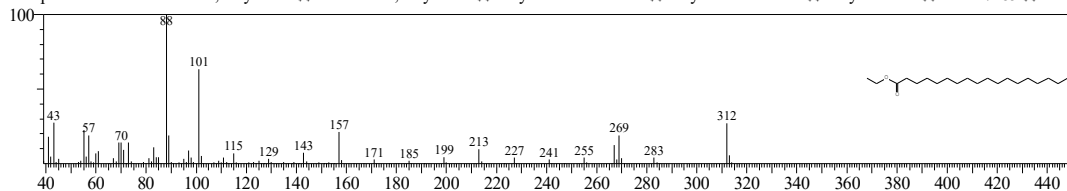

&lt;&lt; Target &gt;&gt;

Line#:43 R.Time:19.833(Scan#:1721) MassPeaks:214  
RawMode:Single 19.833(1721) BasePeak:218.10(222500)  
BG Mode:None Group 1 - Event 1

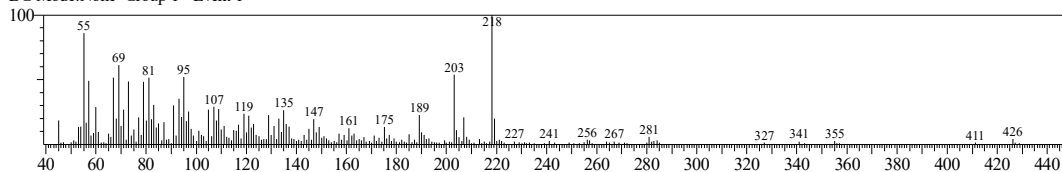

Hit#:1 Entry:120419 Library:NIST11.lib  
SI:72 Formula:C21H34O CAS:56052-96-1 MolWeight:302 RetIndex:2075  
CompName:Androstan-17-one, 16,16-dimethyl-, (5.alpha.)- \$ 16,16-Dimethylandrostan-17-one # \$ \$

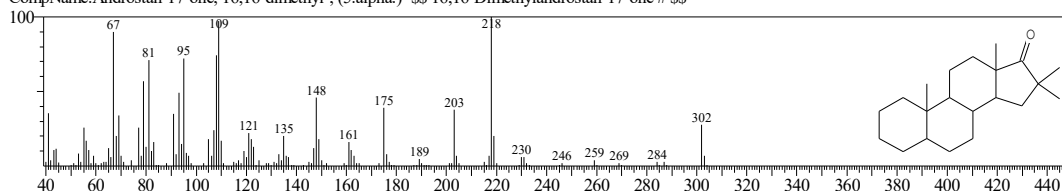

Hit#:2 Entry:99975 Library:NIST11.lib  
SI:69 Formula:C19H32O CAS:54411-60-8 MolWeight:276 RetIndex:1953  
CompName:D-Norandrostan-16-methanol, (5.alpha.,16.beta.)- \$ (8a,10a-Dimethylhexadecahydrocyclobuta[a]phenanthren-1-yl)methanol # \$ \$

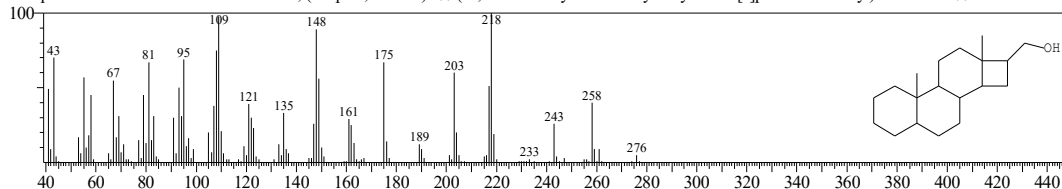

Hit#:3 Entry:110844 Library:NIST11.lib  
SI:69 Formula:C19H30O2 CAS:32319-09-8 MolWeight:290 RetIndex:2067  
CompName:D-Norandrostan-16-carboxylic acid, (5.alpha.,16.beta.)- \$ (8a,10a-Dimethylhexadecahydrocyclobuta[a]phenanthrene-1-carboxylic acid # \$ \$

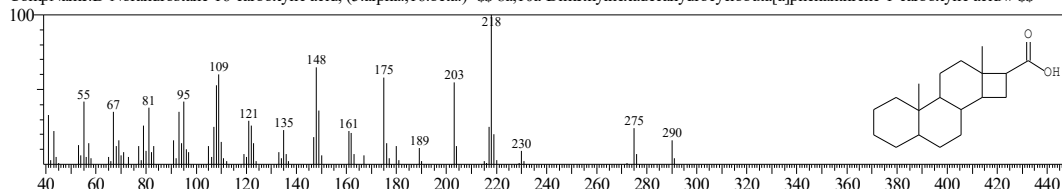

Hit#:4 Entry:186088 Library:NIST11.lib  
SI:68 Formula:C30H50 CAS:464-97-1 MolWeight:410 RetIndex:2685  
CompName:Urs-12-ene

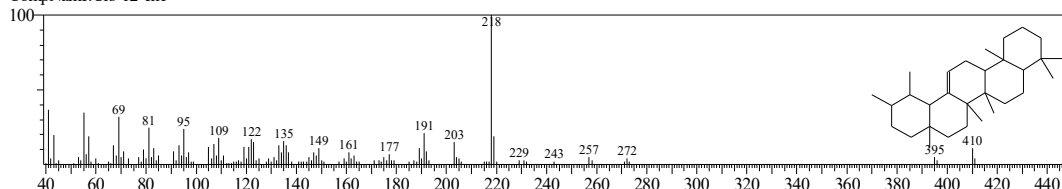

Hit#:5 Entry:56374 Library:NIST11.lib  
SI:68 Formula:C15H22O CAS:0-00-0 MolWeight:218 RetIndex:1673  
CompName:2(1H)Naphthalenone, 3,5,6,7,8,8a-hexahydro-4,8a-dimethyl-6-(1-methylethenyl)- \$ 6-Isopropenyl-4,8a-dimethyl-3,5,6,7,8,8a-hexahydro-2(1H)-na

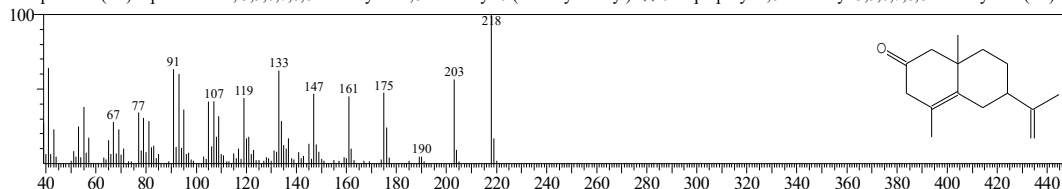

&lt;&lt; Target &gt;&gt;

Line#:44 R.Time:20.092(Scan#:1752) MassPeaks:213  
RawMode:Single 20.092(1752) BasePeak:55.00(173390)  
BG Mode:None Group 1 - Event 1

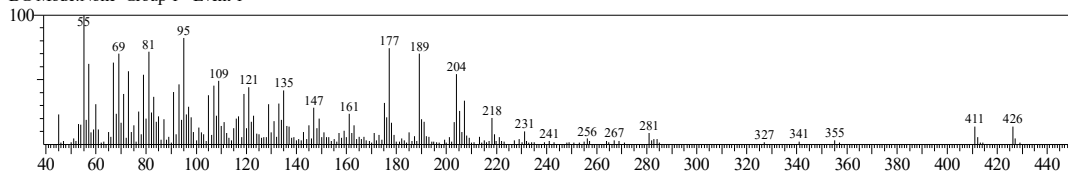

Hit#:1 Entry:59363 Library:NIST11.lib

SE:72 Formula:C15H26O CAS:473-04-1 MolWeight:222 RetIndex:1647

CompName:1-Naphthalenol, decahydro-1,4a-dimethyl-7-(1-methylethylidene)-, [1R-(1.alpha.,4a.beta.,8a.alpha.)]- \$S\$ Eudesm-7(11)-en-4-ol \$S\$ Juniper camphor

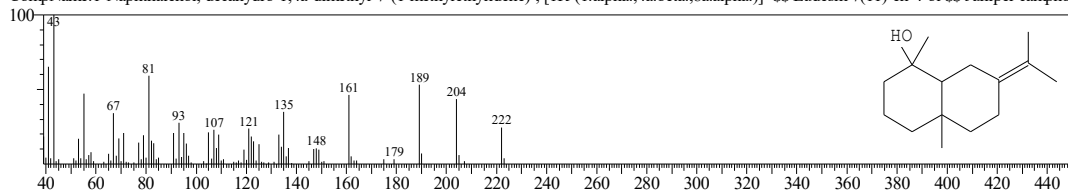

Hit#:2 Entry:89013 Library:NIST11.lib

SE:71 Formula:C18H30O CAS:0-00-0 MolWeight:262 RetIndex:1825

CompName:Sclearoxide(Cis-B/C) \$S\$ 3,4a,7,7,10a-Pentamethyl-4a,5,6,6a,7,8,9,10,10a,10b-decahydro-1H-benzo[f]chromene \$S\$

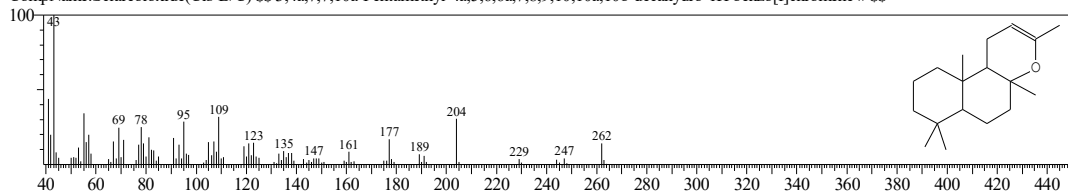

Hit#:3 Entry:59458 Library:NIST11.lib

SE:71 Formula:C15H26O CAS:465-24-7 MolWeight:222 RetIndex:1593

CompName:1,4-Methanoazulen-9-ol, decahydro-1,5,5,8a-tetramethyl-, [1R-(1.alpha.,3a.beta.,4.alpha.,8a.beta.,9S\*)]- \$S\$ Longiborneol \$S\$ Juniperol \$S\$

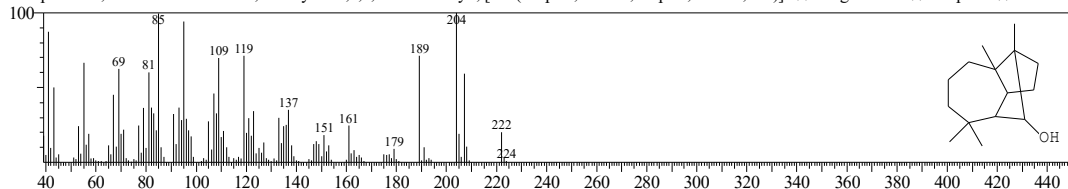

Hit#:4 Entry:57718 Library:NIST11.lib

SE:71 Formula:C15H24O CAS:0-00-0 MolWeight:220 RetIndex:1462

CompName:Aromadendrene oxide-(2)

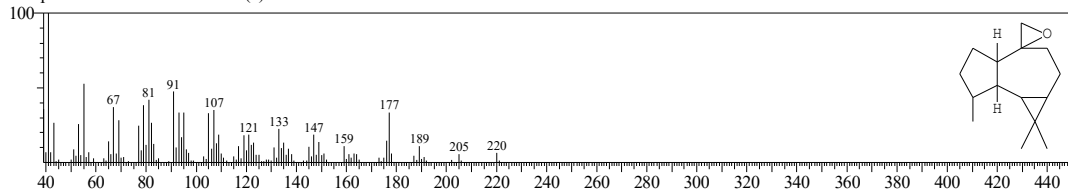

Hit#:5 Entry:46768 Library:NIST11.lib

SE:71 Formula:C15H24 CAS:473-13-2 MolWeight:204 RetIndex:1474

CompName:Naphthalene, 1,2,3,4,4a,5,6,8a-octahydro-4a,8-dimethyl-2-(1-methylethenyl)-, [2R-(2.alpha.,4a.alpha.,8a.beta.)]- \$S\$ .alpha.-Selinene \$S\$ 2-Isoprop

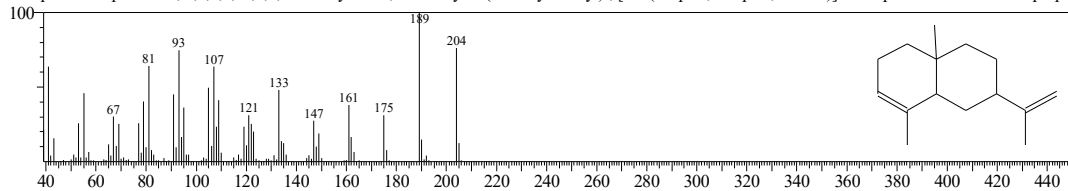

&lt;&lt; Target &gt;&gt;

Line#:45 R.Time:20.392(Scan#:1788) MassPeaks:214  
RawMode:Single 20.392(1788) BasePeak:218.10(185132)  
BG Mode:None Group 1 - Event 1

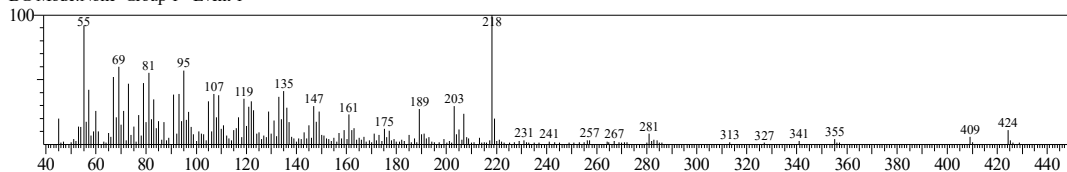

Hit#:1 Entry:120419 Library:NIST11.lib  
SI:73 Formula:C21H34O CAS:56052-96-1 MolWeight:302 RetIndex:2075  
CompName:Androstan-17-one, 16,16-dimethyl-, (5.alpha.)- \$\$(16,16-Dimethylandrostan-17-one)\$\$

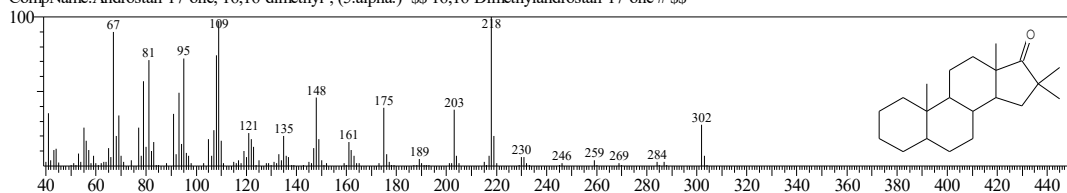

Hit#:2 Entry:101296 Library:NIST11.lib  
SI:72 Formula:C17H26O3 CAS:0-00-0 MolWeight:278 RetIndex:2018  
CompName:Acetic acid, 3-hydroxy-6-isopropenyl-4,8a-dimethyl-1,2,3,5,6,7,8,8a-octahydronaphthalen-2-yl ester \$\$(3-Hydroxy-6-isopropenyl-4,8a-dimethyl-1,2,3,5,6,7,8,8a-octahydronaphthalen-2-yl ester)\$\$

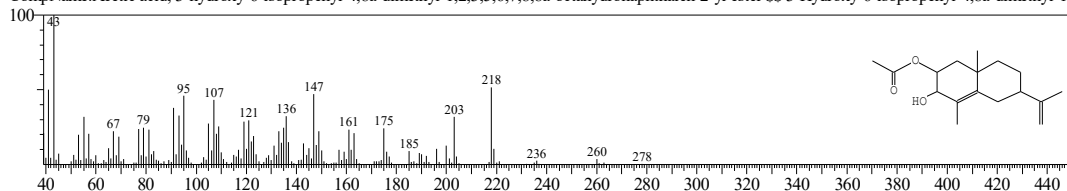

Hit#:3 Entry:101320 Library:NIST11.lib  
SI:72 Formula:C17H26O3 CAS:0-00-0 MolWeight:278 RetIndex:2018  
CompName:Acetic acid, 3-hydroxy-7-isopropenyl-1,4a-dimethyl-2,3,4,4a,5,6,7,8-octahydronaphthalen-2-yl ester \$\$(3-Hydroxy-7-isopropenyl-1,4a-dimethyl-2,3,4,4a,5,6,7,8-octahydronaphthalen-2-yl ester)\$\$

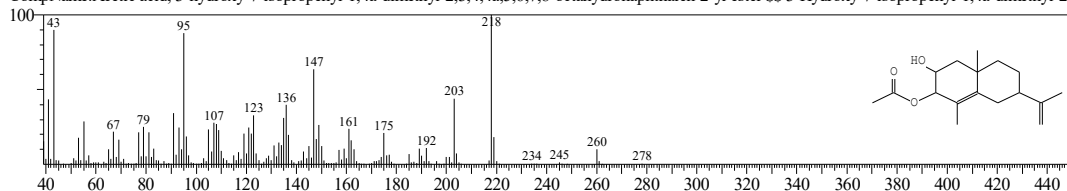

Hit#:4 Entry:99975 Library:NIST11.lib  
SI:71 Formula:C19H32O CAS:54411-60-8 MolWeight:276 RetIndex:1953  
CompName:D-Norandrostane-16-methanol, (5.alpha.,16.beta.)- \$\$(8a,10a-Dimethylhexadecahydrocyclobuta[a]phenanthren-1-yl)methanol)\$\$

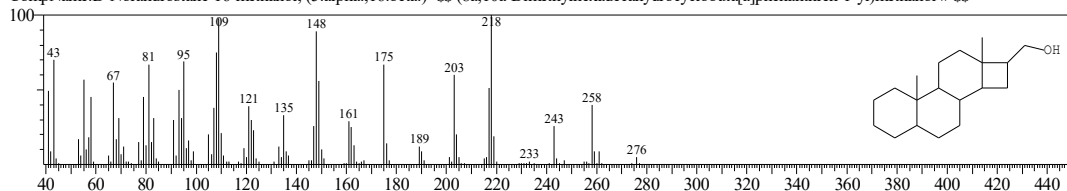

Hit#:5 Entry:110844 Library:NIST11.lib  
SI:70 Formula:C19H30O2 CAS:32319-09-8 MolWeight:290 RetIndex:2067  
CompName:D-Norandrostane-16-carboxylic acid, (5.alpha.,16.beta.)- \$\$(8a,10a-Dimethylhexadecahydrocyclobuta[a]phenanthrene-1-carboxylic acid)\$\$

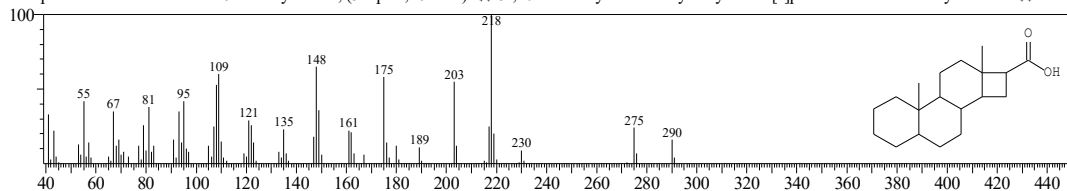

&lt;&lt; Target &gt;&gt;

Line#:46 R.Time:20.650(Scan#:1819) MassPeaks:207

RawMode:Single 20.650(1819) BasePeak:88.00(467740)

BG Mode:None Group 1 - Event 1

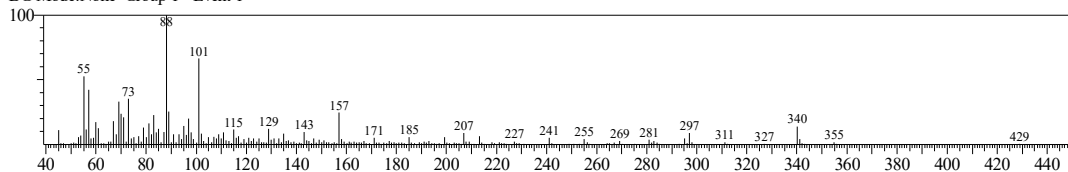

Hit#1 Entry:25180 Library:NIST11s.lib

SE:84 Formula:C18H36O2 CAS:628-97-7 MolWeight:284 RetIndex:1978

CompName:Hexadecanoic acid, ethyl ester \$\$ Palmitic acid, ethyl ester \$\$ Ethyl hexadecanoate \$\$ Ethyl palmitate \$\$ Ethyl n-hexadecanoate \$\$

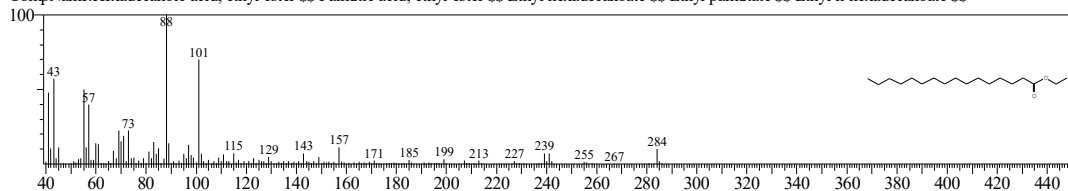

Hit#2 Entry:117162 Library:NIST11s.lib

SE:83 Formula:C19H38O2 CAS:0-00-0 MolWeight:298 RetIndex:2013

CompName:Ethyl 14-methyl-hexadecanoate

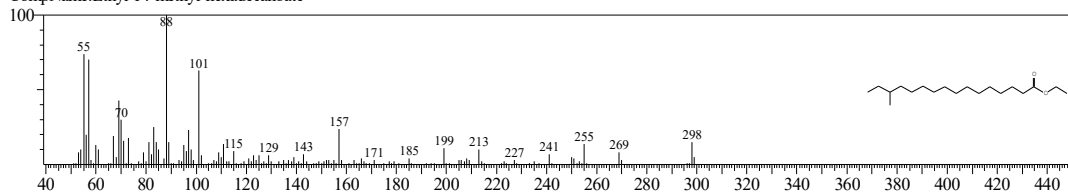

Hit#3 Entry:166830 Library:NIST11s.lib

SE:81 Formula:C24H48O2 CAS:5908-87-2 MolWeight:368 RetIndex:2574

CompName:Docosanoic acid, ethyl ester \$\$ Ethyl docosanoate # \$\$

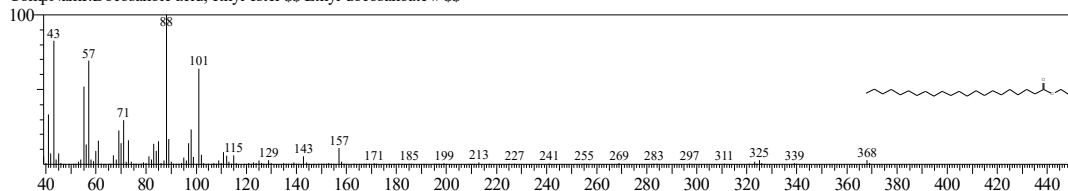

Hit#4 Entry:73692 Library:NIST11s.lib

SE:80 Formula:C14H26O3 CAS:151271-75-9 MolWeight:242 RetIndex:1769

CompName:12-Oxododecanoic acid, ethyl ester \$\$ Ethyl 12-oxododecanoate # \$\$

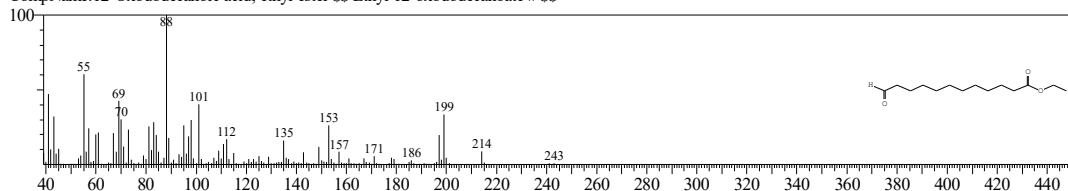

Hit#5 Entry:73860 Library:NIST11s.lib

SE:79 Formula:C15H30O2 CAS:28267-29-0 MolWeight:242 RetIndex:1680

CompName:Ethyl tridecanoate \$\$ Tridecanoic acid ethyl ester \$\$ n-Tridecanoic acid ethyl ester \$\$

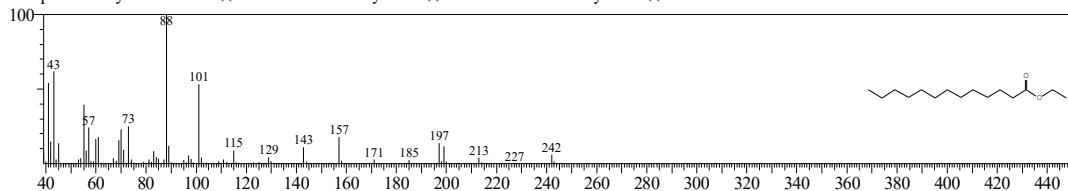

&lt;&lt; Target &gt;&gt;

Line#:47 R.Time:20.725(Scan#:1828) MassPeaks:192  
RawMode:Single 20.725(1828) BasePeak:55.00(143513)  
BG Mode:None Group 1 - Event 1

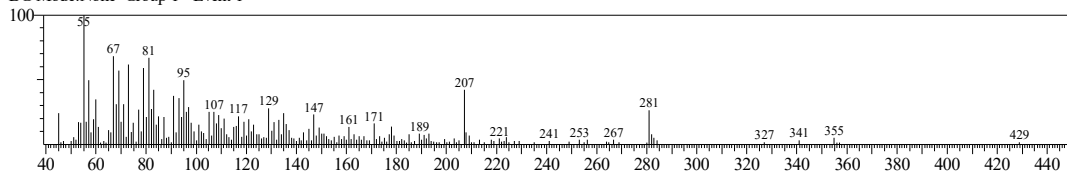

Hit#1 Entry:102809 Library:NIST11.lib  
SI:73 Formula:C18H32O2 CAS:34450-18-5 MolWeight:280 RetIndex:2165  
CompName:17-Octadecynoic acid

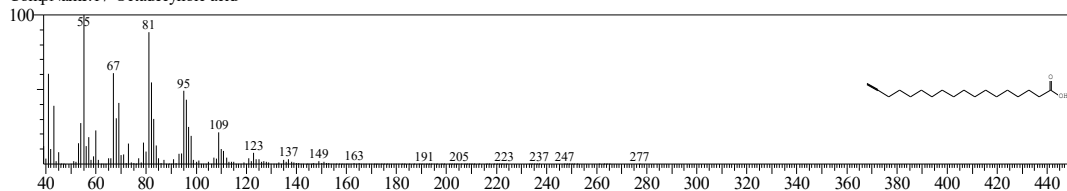

Hit#2 Entry:135733 Library:NIST11.lib  
SI:72 Formula:C21H38O2 CAS:56687-68-4 MolWeight:322 RetIndex:2203  
CompName:[1,1'-Bicyclopropyl]-2-octanoic acid, 2'-hexyl-, methyl ester

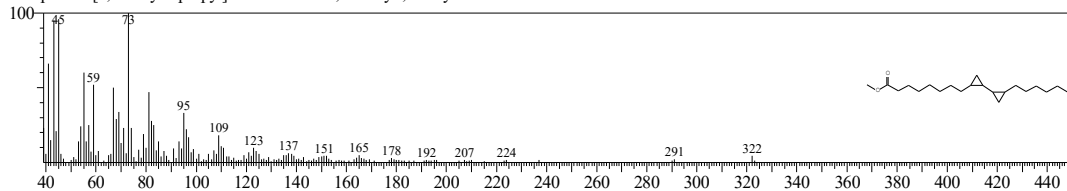

Hit#3 Entry:203338 Library:NIST11.lib  
SI:71 Formula:C30H52O3Si CAS:55759-94-9 MolWeight:488 RetIndex:3258  
CompName:9,10-Secocholesta-5,7,10(19)-triene-1,3-diol, 25-[(trimethylsilyl)oxy]-, (3.beta.,5Z,7E)- SS (5E,7E)-25-[(Trimethylsilyl)oxy]-9,10-secocholesta-5,7,

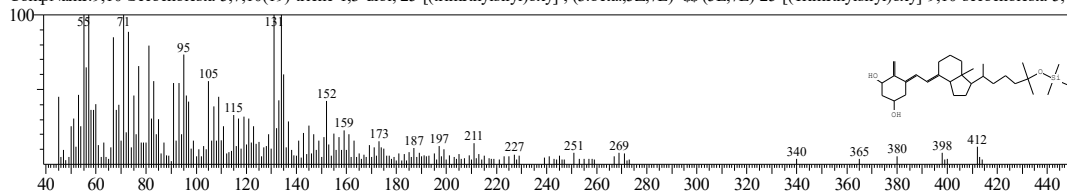

Hit#4 Entry:174146 Library:NIST11.lib  
SI:70 Formula:C22H42O3Si CAS:22074-68-6 MolWeight:382 RetIndex:2377  
CompName:9,12-Octadecadienoic acid, 18-(trimethylsiloxy)-, methyl ester SS Methyl (9E,12E)-18-[(trimethylsilyl)oxy]-9,12-octadecadienoate # SS

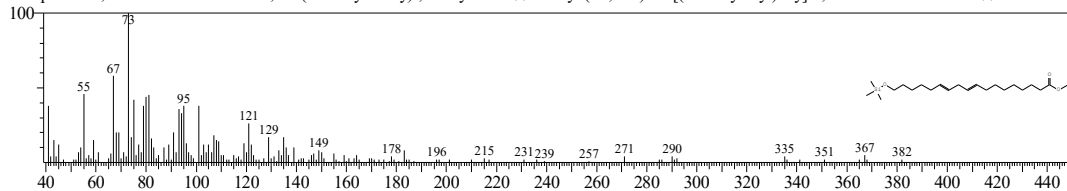

Hit#5 Entry:90501 Library:NIST11.lib  
SI:69 Formula:C18H32O CAS:56630-94-5 MolWeight:264 RetIndex:2077  
CompName:6,9,12-Octadecatrien-1-ol SS (6E,9E,12E)-6,9,12-Octadecatrien-1-ol # SS

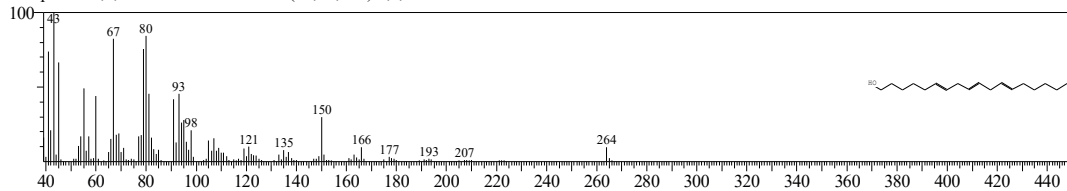

Supplement: s1 [file s1]
